# Supplementary material for: Sex-biased microRNA expression in mammals and birds reveals underlying regulatory mechanisms and a role in dosage compensation
Source: HighWire-hosted journal article supplement (doi:10.1101/gr.225391.117), 2017-10-27
Supplement: Supplemental_Table_S1.xlsx [file Supplemental_Table_S1.xlsx]

## Sheet: README
Supplemental Tables S1A-C contain coordinates for all known and novel miRNA precursor sequences
Genome coordinates correspond to the following releases:
Mouse	mm10
Opossum	monDom5
Chicken	galGal5
Some genome coordinates were obtained by mapping miRNA sequences to the genome with Bowtie (see main text for details). These are indicated by an -M[number] suffix

## Sheet: TableS1A_Mouse_miRNA_loci
chr1	12425985	12426106	mmu-mir-6341	0	+
chr1	20679009	20679082	mmu-mir-206	0	+
chr1	20682768	20682887	mmu-mir-133b	0	+
chr1	23272268	23272339	mmu-mir-30a	0	+
chr1	23291700	23291784	mmu-mir-30c-2	0	+
chr1	29421487	29421612	mmu-mir-6342	0	+
chr1	34117358	34117431	mmu-mir-6896	0	+
chr1	34433120	34433199	mmu-mir-5103	0	-
chr1	36144251	36144313	mmu-mir-6897	0	-
chr1	36348681	36348758	mmu-mir-6898	0	-
chr1	39186895	39186992	mmu-mir-6349	0	-
chr1	47467020	47467125	mmu-mir-6350	0	-
chr1	53849423	53849495	mmu-mir-7681	0	+
chr1	64042437	64042501	mmu-mir-6899	0	-
chr1	73855476	73855575	mmu-mir-6351	0	-
chr1	74206553	74206620	mmu-mir-1928	0	-
chr1	74394309	74394394	mmu-mir-26b	0	+
chr1	74900657	74900721	mmu-mir-375	0	-
chr1	76509559	76509643	mmu-mir-6343	0	+
chr1	77496652	77496768	mmu-mir-6352	0	-
chr1	82131915	82132019	mmu-mir-6344	0	+
chr1	84218848	84218961	mmu-mir-6353	0	-
chr1	84695838	84695915	mmu-mir-5126	0	+
chr1	85751947	85752074	mmu-mir-8096	0	+
chr1	86351980	86352127	mmu-mir-3535	0	-
chr1	92464482	92464542	mmu-mir-6900	0	-
chr1	92850377	92850443	mmu-mir-149	0	+
chr1	93274548	93274610	mmu-mir-6901	0	+
chr1	93346091	93346155	mmu-mir-6902	0	+
chr1	93352157	93352285	mmu-mir-6345	0	+
chr1	106546495	106546631	mmu-mir-3473f	0	-
chr1	118954219	118954300	mmu-mir-6346	0	+
chr1	128202360	128202430	mmu-mir-128-1	0	+
chr1	132198087	132198184	mmu-mir-135b	0	+
chr1	133726557	133726645	mmu-mir-6903	0	-
chr1	134946233	134946299	mmu-novel-1	0	-
chr1	135454602	135454683	mmu-mir-1231	0	-
chr1	137966454	137966541	mmu-mir-181a-1	0	+
chr1	137966638	137966718	mmu-mir-181b-1	0	+
chr1	151442392	151442450	mmu-mir-7682	0	+
chr1	153899925	153900036	mmu-mir-8114	0	+
chr1	158505624	158505733	mmu-mir-488	0	+
chr1	159340357	159340423	mmu-mir-1843b	0	+
chr1	160295863	160295972	mmu-mir-1927	0	-
chr1	162217813	162217923	mmu-mir-199a-2	0	+
chr1	162223367	162223477	mmu-mir-214	0	+
chr1	164217677	164217740	mmu-novel-2	0	+
chr1	167290124	167290225	mmu-mir-6347	0	+
chr1	168490642	168490762	mmu-mir-6348	0	+
chr1	169018973	169019089	mmu-mir-6354	0	-
chr1	171064590	171064652	mmu-mir-6546	0	-
chr1	171641839	171641900	mmu-mir-7683	0	-
chr1	176772324	176772423	mmu-mir-350	0	-
chr1	177579451	177579529	mmu-novel-3	0	-
chr1	180587200	180587267	mmu-mir-6904	0	+
chr1	184822406	184822488	mmu-mir-1981	0	-
chr1	185242974	185243043	mmu-mir-664	0	+
chr1	185313318	185313385	mmu-mir-194-1	0	+
chr1	185313580	185313692	mmu-mir-215	0	+
chr1	191998553	191998634	mmu-mir-3473c	0	-
# Genomic coordinates of all known (miRBase) and novel miRNA precursors analysed in this study
# Genome release: mm10
# All novel precursors have been submitted to miRBase
chr1	193507462	193507530	mmu-mir-205	0	-
chr1	194822000	194822064	mmu-mir-3962	0	+
chr1	195037039	195037120	mmu-mir-29b-2	0	+
chr1	195037546	195037634	mmu-mir-29c	0	+
chr10	7836380	7836474	mmu-mir-5104	0	+
chr10	20297580	20297688	mmu-mir-6413	0	-
chr10	22729371	22729432	mmu-mir-7663	0	-
chr10	24910663	24910733	mmu-mir-6905	0	+
chr10	41670738	41670793	mmu-mir-3473b	0	+
chr10	44359675	44359768	mmu-mir-1929	0	+
chr10	60126775	60126833	mmu-mir-6906	0	+
chr10	60923022	60923113	mmu-mir-6408	0	+
chr10	60960722	60960844	mmu-mir-466j	0	+
chr10	61774736	61774821	mmu-mir-5108	0	+
chr10	62194166	62194227	mmu-mir-7662	0	-
chr10	62682507	62682558	mmu-mir-7215	0	+
chr10	76008925	76009017	mmu-mir-6409	0	+
chr10	76207325	76207409	mmu-mir-678	0	-
chr10	77641223	77641307	mmu-mir-1930	0	+
chr10	78340149	78340207	mmu-mir-7659	0	-
chr10	78408474	78408545	mmu-mir-6907	0	-
chr10	78434798	78434902	mmu-mir-6410	0	+
chr10	78445094	78445157	mmu-mir-6908	0	-
chr10	79531028	79531090	mmu-mir-6909	0	-
chr10	79862586	79862652	mmu-mir-6910	0	+
chr10	80278163	80278232	mmu-mir-6911	0	+
chr10	80609259	80609329	mmu-mir-6912	0	+
chr10	80828796	80828870	mmu-mir-1982	0	+
chr10	81104613	81104673	mmu-mir-5615-1	0	-
chr10	81104615	81104675	mmu-mir-5615-2	0	+
chr10	81271596	81271687	mmu-mir-3057	0	+
chr10	81386346	81386412	mmu-mir-6913	0	+
chr10	81416239	81416297	mmu-mir-1191b	0	-
chr10	92072085	92072185	mmu-mir-135a-2	0	-
chr10	92137139	92137223	mmu-mir-1251	0	-
chr10	93162784	93162903	mmu-mir-1931	0	+
chr10	93433106	93433162	mmu-mir-7688	0	+
chr10	93963767	93963863	mmu-mir-331	0	-
chr10	94586136	94586199	mmu-mir-7211	0	-
chr10	95559230	95559321	mmu-mir-3058	0	-
chr10	97423477	97423562	mmu-mir-3966	0	+
chr10	101772691	101772772	mmu-mir-3059	0	+
chr10	104287268	104287376	mmu-mir-6411	0	+
chr10	111185629	111185698	mmu-novel-4	0	+
chr10	120447990	120448110	mmu-mir-763	0	-
chr10	122648338	122648435	mmu-mir-6412	0	+
chr10	122679314	122679415	mmu-mir-8104	0	+
chr10	122985641	122985719	mmu-let-7i	0	-
chr10	126710281	126710391	mmu-mir-378d	0	-
chr10	126995529	126995613	mmu-mir-26a-2	0	+
chr10	126998439	126998560	mmu-mir-546	0	+
chr10	128085285	128085363	mmu-mir-677	0	+
chr10	128382837	128382906	mmu-mir-6914	0	+
chr10	128388831	128388900	mmu-mir-6915	0	+
chr10	128458679	128458768	mmu-mir-8105	0	+
chr10	128511967	128512030	mmu-mir-6916	0	-
chr10	128584436	128584497	mmu-mir-6917	0	-
chr11	3516934	3517002	mmu-novel-5	0	+
chr11	4139363	4139446	mmu-mir-3060	0	+
chr11	4891344	4891402	mmu-mir-6918	0	+
chr11	6401629	6401693	mmu-mir-7651	0	+
chr11	21344587	21344675	mmu-mir-1933	0	-
chr11	26202239	26202348	mmu-mir-6372	0	+
chr11	28746190	28746276	mmu-mir-216b	0	+
chr11	28746197	28746266	mmu-mir-216c	0	-
chr11	28757011	28757083	mmu-mir-216a	0	+
chr11	28763727	28763835	mmu-mir-217	0	+
chr11	35616815	35616925	mmu-mir-218-2	0	+
chr11	35782395	35782481	mmu-mir-103-1	0	+
chr11	43374396	43374461	mmu-mir-146a	0	-
chr11	46102269	46102390	mmu-mir-8100	0	+
chr11	46170086	46170143	mmu-mir-7239	0	+
chr11	50069701	50069799	mmu-mir-340	0	+
chr11	50232244	50232306	mmu-mir-6919	0	+
chr11	50357784	50357879	mmu-mir-804	0	-
chr11	52126745	52126836	mmu-mir-3061	0	+
chr11	53409196	53409267	mmu-mir-6920	0	+
chr11	53763596	53763654	mmu-mir-7671	0	-
chr11	55501225	55501281	mmu-mir-7652	0	+
chr11	60200537	60200617	mmu-mir-6921	0	-
chr11	60202261	60202327	mmu-mir-6922	0	-
chr11	60728662	60728726	mmu-mir-5100	0	+
chr11	65734732	65734832	mmu-mir-744	0	-
chr11	67099803	67099875	mmu-mir-6923	0	+
chr11	68220891	68221011	mmu-mir-6406	0	+
chr11	68990573	68990678	mmu-mir-3062	0	-
chr11	69635399	69635519	mmu-mir-467f	0	-
chr11	69663042	69663125	mmu-mir-1934	0	+
chr11	69882031	69882094	mmu-mir-6924	0	-
chr11	70012042	70012131	mmu-mir-324	0	+
chr11	70234691	70234816	mmu-mir-497b	0	-
chr11	70234716	70234800	mmu-mir-497a	0	+
chr11	70235041	70235135	mmu-mir-195a	0	+
chr11	70438254	70438318	mmu-mir-7115	0	+
chr11	70705989	70706059	mmu-mir-6925	0	+
chr11	72388755	72388864	mmu-mir-6338	0	+
chr11	74868126	74868194	mmu-mir-6926	0	-
chr11	75173387	75173478	mmu-mir-212	0	+
chr11	75173681	75173747	mmu-mir-132	0	+
chr11	75463715	75463810	mmu-mir-22	0	+
chr11	75551428	75551511	mmu-mir-3971	0	+
chr11	77078063	77078172	mmu-mir-423	0	-
chr11	77467519	77467574	mmu-novel-7	0	+
chr11	78073004	78073070	mmu-mir-144	0	+
chr11	78073169	78073241	mmu-mir-451a	0	+
chr11	78073169	78073241	mmu-mir-451b	0	-
chr11	78178826	78178887	mmu-mir-7653	0	+
chr11	79711968	79712034	mmu-mir-193a	0	+
chr11	79726399	79726511	mmu-mir-365-2	0	+
chr11	82985002	82985065	mmu-mir-7679	0	-
chr11	85760615	85760702	mmu-mir-5110	0	-
chr11	86584066	86584158	mmu-mir-21a	0	-
chr11	86852603	86852658	mmu-novel-8	0	-
chr11	87113003	87113089	mmu-mir-301a	0	+
chr11	87756840	87756955	mmu-mir-142b	0	-
chr11	87756863	87756927	mmu-mir-142a	0	+
chr11	88352772	88352864	mmu-mir-378b	0	+
chr11	95963291	95963383	mmu-mir-3063	0	-
chr11	96265163	96265265	mmu-mir-196a-1	0	+
chr11	96317164	96317274	mmu-mir-10a	0	+
chr11	96850392	96850465	mmu-mir-152	0	+
chr11	97063767	97063874	mmu-mir-8103	0	+
chr11	97146363	97146419	mmu-mir-7235	0	-
chr11	97677059	97677130	mmu-mir-6927	0	+
chr11	97744896	97745035	mmu-mir-8102	0	+
chr11	98262605	98262662	mmu-mir-5119	0	+
chr11	100478410	100478480	mmu-mir-7116	0	-
chr11	101030339	101030409	mmu-mir-6928	0	+
chr11	101419186	101419253	mmu-mir-6929	0	-
chr11	102230039	102230150	mmu-mir-8101	0	-
chr11	102404919	102404987	mmu-mir-6930	0	-
chr11	102999847	102999921	mmu-mir-6931	0	-
chr11	106782692	106782759	mmu-mir-3064	0	-
chr11	107637721	107637779	mmu-mir-6932	0	+
chr11	107996847	107996916	mmu-mir-7223	0	+
chr11	115447960	115448060	mmu-mir-3968	0	-
chr11	115795823	115795886	mmu-mir-5621	0	+
chr11	117077347	117077457	mmu-mir-6516	0	+
chr11	118002269	118002350	mmu-mir-6933	0	+
chr11	119154075	119154137	mmu-mir-6934	0	-
chr11	119390471	119390561	mmu-mir-1932	0	+
chr11	120014764	120014862	mmu-mir-338	0	-
chr11	120014766	120014853	mmu-mir-3065	0	+
chr11	120347349	120347413	mmu-mir-6935	0	-
chr11	120624822	120624876	mmu-mir-6936	0	-
chr11	121387144	121387204	mmu-mir-7236	0	-
chr12	11299886	11299944	mmu-mir-7675	0	+
chr12	15800993	15801101	mmu-mir-6387	0	-
chr12	17355391	17355474	mmu-mir-3066	0	+
chr12	26414900	26415010	mmu-mir-6538	0	-
chr12	28679324	28679389	mmu-mir-6937	0	+
chr12	35194810	35194897	mmu-mir-680-3	0	-
chr12	36816204	36816278	mmu-mir-5099	0	+
chr12	40222711	40222811	mmu-mir-1938	0	-
chr12	44210312	44210373	mmu-mir-5627	0	+
chr12	54645932	54646012	mmu-mir-1892	0	-
chr12	69763834	69763944	mmu-mir-681	0	-
chr12	75909102	75909185	mmu-mir-5101	0	+
chr12	76533133	76533212	mmu-mir-5135	0	-
chr12	80391612	80391677	mmu-mir-1843a	0	-
chr12	81166150	81166234	mmu-mir-3067	0	+
chr12	85245922	85245985	mmu-mir-6938	0	-
chr12	87437678	87437757	mmu-mir-3068	0	-
chr12	93927337	93927464	mmu-mir-8099-2	0	+
chr12	101021672	101021768	mmu-mir-1190	0	-
chr12	102684927	102685020	mmu-mir-1936	0	-
chr12	104269205	104269253	mmu-novel-10	0	-
chr12	105031076	105031141	mmu-mir-3069	0	-
chr12	108658619	108658718	mmu-mir-342	0	+
chr12	108836972	108837068	mmu-mir-345	0	+
chr12	109544540	109544620	mmu-mir-1906-1	0	+
chr12	109563691	109563785	mmu-mir-770	0	+
chr12	109571989	109572080	mmu-mir-673	0	+
chr12	109580232	109580315	mmu-mir-493	0	+
chr12	109585788	109585885	mmu-mir-337	0	+
chr12	109585812	109585873	mmu-mir-3544	0	-
chr12	109586079	109586146	mmu-mir-540	0	+
chr12	109586313	109586407	mmu-mir-665	0	+
chr12	109587942	109588031	mmu-mir-3070-1	0	+
chr12	109588591	109588680	mmu-mir-3070-2	0	+
chr12	109590446	109590537	mmu-mir-431	0	+
chr12	109591714	109591838	mmu-mir-433	0	+
chr12	109592845	109592915	mmu-mir-127	0	+
chr12	109594505	109594599	mmu-mir-434	0	+
chr12	109594955	109595030	mmu-mir-432	0	+
chr12	109595317	109595397	mmu-mir-3071	0	-
chr12	109595326	109595388	mmu-mir-136	0	+
chr12	109611499	109611595	mmu-mir-341	0	+
chr12	109611821	109611941	mmu-mir-1188	0	+
chr12	109618257	109618336	mmu-mir-370	0	+
chr12	109681520	109681591	mmu-novel-11	0	+
chr12	109682196	109682273	mmu-mir-882	0	+
chr12	109709059	109709125	mmu-mir-379	0	+
chr12	109710174	109710256	mmu-mir-411	0	+
chr12	109710637	109710700	mmu-mir-299a	0	+
chr12	109710644	109710693	mmu-mir-299b	0	-
chr12	109711802	109711863	mmu-mir-380	0	+
chr12	109712316	109712436	mmu-mir-1197	0	+
chr12	109712507	109712593	mmu-mir-323	0	+
chr12	109712809	109712890	mmu-mir-758	0	+
chr12	109713480	109713577	mmu-mir-329	0	+
chr12	109715317	109715402	mmu-mir-494	0	+
chr12	109715576	109715650	mmu-mir-679	0	+
chr12	109715670	109715791	mmu-mir-1193	0	+
chr12	109717084	109717183	mmu-mir-666	0	+
chr12	109717257	109717333	mmu-mir-543	0	+
chr12	109718753	109718816	mmu-mir-495	0	+
chr12	109720005	109720097	mmu-mir-667	0	+
chr12	109722717	109722803	mmu-mir-376c	0	+
chr12	109723217	109723301	mmu-mir-654	0	+
chr12	109723457	109723539	mmu-mir-376b	0	+
chr12	109723780	109723848	mmu-mir-376a	0	+
chr12	109724312	109724391	mmu-mir-300	0	+
chr12	109726821	109726896	mmu-mir-381	0	+
chr12	109727332	109727414	mmu-mir-487b	0	+
chr12	109728128	109728202	mmu-mir-539	0	+
chr12	109729324	109729402	mmu-mir-544	0	+
chr12	109733770	109733846	mmu-mir-382	0	+
chr12	109734138	109734209	mmu-mir-134	0	+
chr12	109734731	109734797	mmu-mir-668	0	+
chr12	109734901	109734974	mmu-mir-485	0	+
chr12	109735618	109735700	mmu-mir-453	0	+
chr12	109738432	109738498	mmu-mir-154	0	+
chr12	109739118	109739197	mmu-mir-496a	0	+
chr12	109740509	109740577	mmu-mir-377	0	+
chr12	109742408	109742498	mmu-mir-541	0	+
chr12	109743157	109743236	mmu-mir-409	0	+
chr12	109743288	109743368	mmu-mir-412	0	+
chr12	109743417	109743496	mmu-mir-369	0	+
chr12	109743714	109743795	mmu-mir-410	0	+
chr12	109747877	109747960	mmu-mir-3072	0	+
chr12	110278047	110278129	mmu-mir-1247	0	-
chr12	111540936	111540997	mmu-novel-12	0	+
chr12	112109237	112109322	mmu-mir-3073a	0	+
chr12	112109249	112109309	mmu-mir-3073b	0	-
chr12	112130879	112130955	mmu-mir-203	0	+
chr12	112130886	112130946	mmu-novel-13	0	-
chr12	112659276	112659351	mmu-mir-6939	0	-
chr12	112733321	112733391	mmu-mir-6940	0	+
chr12	112920482	112920541	mmu-mir-6941	0	-
chr12	114469406	114469466	mmu-mir-7094-1	0	-
chr12	114513634	114513694	mmu-mir-7094-2	0	-
chr12	115695719	115695794	mmu-mir-6388	0	-
chr12	117250816	117250885	mmu-mir-153	0	+
chr13	17747472	17747593	mmu-mir-466i	0	+
chr13	21396577	21396638	mmu-mir-6942	0	-
chr13	21445159	21445240	mmu-mir-1896	0	+
chr13	24980054	24980118	mmu-novel-15	0	+
chr13	28710780	28710873	mmu-mir-6368	0	-
chr13	40865790	40865862	mmu-mir-5124a	0	+
chr13	48536023	48536099	mmu-let-7d	0	-
chr13	48537832	48537910	mmu-let-7f-1	0	-
chr13	48538187	48538260	mmu-let-7a-1	0	-
chr13	50544625	50544734	mmu-mir-683-1	0	-
chr13	50600971	50601080	mmu-mir-683-2	0	-
chr13	55453105	55453171	mmu-mir-6943	0	+
chr13	55477680	55477776	mmu-mir-6944	0	-
chr13	55507624	55507692	mmu-mir-6945	0	-
chr13	58023124	58023200	mmu-mir-874	0	-
chr13	58313043	58313149	mmu-mir-6369	0	-
chr13	58392778	58392886	mmu-mir-7a-1	0	-
chr13	62760738	62760846	mmu-mir-713	0	+
chr13	63300483	63300557	mmu-mir-23b	0	+
chr13	63300711	63300784	mmu-mir-27b	0	+
chr13	63301198	63301283	mmu-mir-3074-1	0	-
chr13	63301207	63301275	mmu-mir-24-1	0	+
chr13	71107088	71107209	mmu-mir-466f-4	0	+
chr13	74407064	74407173	mmu-mir-692-3	0	+
chr13	75645045	75645141	mmu-mir-682	0	+
chr13	82698274	82698333	mmu-mir-3961	0	-
chr13	83738813	83738885	mmu-mir-9-2	0	+
chr13	83738820	83738876	mmu-novel-16	0	-
chr13	93790776	93790837	mmu-mir-5624	0	+
chr13	109324743	109324824	mmu-mir-582	0	+
chr13	109903808	109903888	mmu-mir-1904	0	+
chr13	113035982	113036091	mmu-mir-449c	0	+
chr13	113037418	113037498	mmu-mir-449b	0	+
chr13	113037533	113037624	mmu-mir-449a	0	+
chr14	11282476	11282561	mmu-mir-5124b	0	+
chr14	20690634	20690703	mmu-mir-6946	0	+
chr14	24088876	24088930	mmu-mir-7210	0	+
chr14	25534438	25534523	mmu-mir-3075	0	+
chr14	26669546	26669608	mmu-mir-7672	0	-
chr14	29988887	29988952	mmu-mir-6947	0	+
chr14	30572148	30572208	mmu-mir-3076	0	+
chr14	34894608	34894706	mmu-mir-346	0	+
chr14	44947442	44947511	mmu-mir-327	0	-
chr14	45657960	45658053	mmu-mir-5131	0	-
chr14	46954829	46954928	mmu-mir-378c	0	-
chr14	54616676	54616785	mmu-mir-686	0	-
chr14	54643048	54643110	mmu-mir-6948	0	-
chr14	54949059	54949142	mmu-mir-208a	0	-
chr14	54975699	54975776	mmu-mir-208b	0	-
chr14	56082400	56082468	mmu-mir-6949	0	-
chr14	57798423	57798487	mmu-mir-3077	0	+
chr14	60228805	60228915	mmu-mir-719	0	-
chr14	61631879	61631972	mmu-mir-16-1	0	-
chr14	61632026	61632110	mmu-mir-15a	0	-
chr14	62837720	62837857	mmu-mir-8098	0	+
chr14	62865541	62865651	mmu-mir-6541	0	+
chr14	63150291	63150348	mmu-novel-17	0	-
chr14	63727188	63727267	mmu-mir-598	0	+
chr14	64590656	64590741	mmu-mir-124-1	0	+
chr14	64591184	64591271	mmu-mir-3078	0	+
chr14	67859635	67859745	mmu-mir-6539	0	-
chr14	69692247	69692320	mmu-mir-6950	0	+
chr14	70443509	70443591	mmu-mir-320	0	+
chr14	73206762	73206851	mmu-mir-687	0	-
chr14	78191372	78191478	mmu-mir-1971	0	-
chr14	79738430	79738528	mmu-mir-759	0	+
chr14	102982548	102982632	mmu-mir-5130	0	-
chr14	105623641	105623770	mmu-mir-6390	0	-
chr14	115043670	115043754	mmu-mir-17	0	+
chr14	115043850	115043946	mmu-mir-18a	0	+
chr14	115043999	115044081	mmu-mir-19a	0	+
chr14	115044156	115044263	mmu-mir-20a	0	+
chr14	115044304	115044391	mmu-mir-19b-1	0	+
chr14	115044426	115044506	mmu-mir-92a-1	0	+
chr14	117953742	117953847	mmu-mir-6239	0	-
chr14	118258633	118258736	mmu-mir-6241	0	+
chr14	118592368	118592472	mmu-mir-6391	0	-
chr15	12171491	12171574	mmu-mir-1898	0	+
chr15	25948226	25948287	mmu-mir-7212	0	+
chr15	27571493	27571558	mmu-mir-7117	0	+
chr15	29713330	29713404	mmu-mir-3964	0	-
chr15	35660830	35660918	mmu-mir-599	0	-
chr15	35660969	35661047	mmu-mir-875	0	-
chr15	36240045	36240164	mmu-mir-8097	0	-
chr15	38490472	38490547	mmu-mir-6951	0	-
chr15	50889024	50889114	mmu-mir-1907	0	-
chr15	53614204	53614279	mmu-mir-28c	0	-
chr15	68337414	68337510	mmu-mir-30b	0	-
chr15	68341207	68341289	mmu-mir-30d	0	-
chr15	73254814	73254882	mmu-mir-151	0	-
chr15	76064827	76064888	mmu-mir-6952	0	-
chr15	76215610	76215673	mmu-mir-1942	0	-
chr15	76248190	76248258	mmu-mir-6953	0	+
chr15	76290878	76290968	mmu-mir-3079	0	-
chr15	76433213	76433273	mmu-mir-6954	0	+
chr15	78284787	78284849	mmu-mir-7676-1	0	-
chr15	78348598	78348660	mmu-mir-7676-2	0	+
chr15	78891839	78891913	mmu-mir-6955	0	+
chr15	79002222	79002284	mmu-mir-6956	0	+
chr15	79375227	79375300	mmu-mir-1943	0	-
chr15	79998969	79999026	mmu-mir-7213	0	-
chr15	80646072	80646136	mmu-mir-6957	0	+
chr15	80940038	80940120	mmu-mir-5113	0	+
chr15	82198121	82198190	mmu-mir-33	0	+
chr15	82393918	82393978	mmu-mir-7684	0	-
chr15	82959217	82959296	mmu-mir-3080	0	-
chr15	83341802	83341858	mmu-novel-18	0	-
chr15	83362903	83362959	mmu-novel-19	0	-
chr15	84168269	84168377	mmu-mir-6392	0	+
chr15	84951525	84951623	mmu-mir-1249	0	-
chr15	85706615	85706685	mmu-let-7c-2	0	+
chr15	85707324	85707400	mmu-let-7b	0	+
chr15	87795849	87795943	mmu-mir-6393	0	-
chr15	89162847	89162908	mmu-mir-7118	0	-
chr15	89185464	89185537	mmu-mir-6958	0	-
chr15	89305657	89305732	mmu-mir-6959	0	-
chr15	90224359	90224412	mmu-mir-7648	0	+
chr15	98519761	98519878	mmu-mir-1291	0	-
chr15	99080804	99080865	mmu-mir-6960	0	+
chr15	100649162	100649229	mmu-mir-6961	0	-
chr15	101193868	101193931	mmu-mir-6962	0	+
chr15	101369351	101369434	mmu-mir-1941	0	+
chr15	102328647	102328709	mmu-novel-20	0	+
chr15	102671791	102671866	mmu-mir-688	0	-
chr15	102973349	102973434	mmu-mir-196a-2	0	+
chr15	103014909	103015001	mmu-mir-615	0	+
chr15	103285124	103285221	mmu-mir-148b	0	+
chr15	103350454	103350525	mmu-mir-6963	0	-
chr16	5215788	5215874	mmu-mir-6364	0	-
chr16	11254367	11254445	mmu-mir-1945	0	-
chr16	13449522	13449601	mmu-mir-193b	0	+
chr16	13453839	13453926	mmu-mir-365-1	0	+
chr16	13471079	13471180	mmu-mir-6365	0	-
chr16	14159625	14159692	mmu-mir-484	0	+
chr16	17124060	17124142	mmu-mir-130b	0	-
chr16	17124399	17124496	mmu-mir-301b	0	-
chr16	18165088	18165170	mmu-mir-6366	0	-
chr16	18284238	18284317	mmu-mir-1306	0	-
chr16	18284549	18284637	mmu-mir-3618	0	-
chr16	18327400	18327465	mmu-mir-185	0	-
chr16	20604451	20604536	mmu-mir-1224	0	+
chr16	21256012	21256066	mmu-mir-7680	0	-
chr16	22532055	22532184	mmu-mir-8095	0	-
chr16	22605325	22605432	mmu-mir-6362	0	+
chr16	24827854	24827940	mmu-mir-28a	0	+
chr16	28599934	28600043	mmu-mir-690	0	-
chr16	32267449	32267583	mmu-mir-1946a	0	-
chr16	33105360	33105445	mmu-mir-1947	0	+
chr16	42303361	42303469	mmu-mir-6540	0	-
chr16	43640654	43640737	mmu-mir-568	0	+
chr16	44013851	44013977	mmu-mir-3470b	0	+
chr16	44558045	44558129	mmu-mir-3081	0	-
chr16	50727131	50727245	mmu-mir-6363	0	+
chr16	55494730	55494797	mmu-mir-5118	0	+
chr16	57610785	57610845	mmu-novel-21	0	+
chr16	74341989	74342067	mmu-mir-691	0	-
chr16	77598935	77599000	mmu-mir-99a	0	+
chr16	77599671	77599738	mmu-let-7c-1	0	+
chr16	77646272	77646343	mmu-mir-125b-2	0	+
chr16	84714139	84714204	mmu-mir-155	0	+
chr16	91527442	91527544	mmu-mir-6367	0	-
chr16	93369719	93369816	mmu-mir-802	0	+
chr16	97877232	97877291	mmu-mir-6964	0	-
chr17	6895228	6895337	mmu-mir-692-1	0	-
chr17	17830187	17830257	mmu-mir-99b	0	+
chr17	17830365	17830432	mmu-let-7e	0	+
chr17	17830811	17830879	mmu-mir-125a	0	+
chr17	23823290	23823369	mmu-mir-5125	0	+
chr17	24234526	24234604	mmu-mir-5134	0	-
chr17	24240883	24240947	mmu-mir-6965	0	-
chr17	25160502	25160576	mmu-novel-22	0	+
chr17	25245550	25245638	mmu-mir-3547	0	-
chr17	25780807	25780879	mmu-mir-6966	0	+
chr17	25831364	25831428	mmu-mir-3082	0	-
chr17	26920961	26921019	mmu-mir-6967-1	0	+
chr17	26935471	26935539	mmu-mir-6968	0	+
chr17	26948055	26948119	mmu-mir-3083	0	-
chr17	26948059	26948116	mmu-novel-23	0	+
chr17	27091244	27091311	mmu-mir-7677	0	+
chr17	27317034	27317095	mmu-mir-7214	0	-
chr17	27328384	27328460	mmu-mir-7216	0	+
chr17	27355737	27355799	mmu-mir-7217	0	+
chr17	27358096	27358155	mmu-mir-7218	0	+
chr17	28558440	28558501	mmu-mir-6969	0	-
chr17	29595537	29595600	mmu-mir-7667	0	+
chr17	33886675	33886733	mmu-mir-6967-2	0	-
chr17	34024982	34025092	mmu-mir-219a-1	0	-
chr17	34025011	34025071	mmu-mir-219c	0	+
chr17	34841808	34841871	mmu-mir-6971	0	-
chr17	34845100	34845167	mmu-mir-6970	0	-
chr17	34857568	34857632	mmu-mir-6972	0	-
chr17	35194971	35195049	mmu-mir-6973a	0	+
chr17	35204474	35204557	mmu-mir-6974	0	-
chr17	35244074	35244135	mmu-mir-6975	0	+
chr17	35251288	35251405	mmu-mir-8094	0	+
chr17	35917888	35917969	mmu-mir-1894	0	+
chr17	35960729	35960814	mmu-mir-877	0	-
chr17	46231530	46231619	mmu-mir-693	0	+
chr17	46553826	46553889	mmu-mir-6976	0	-
chr17	56242987	56243098	mmu-mir-7b	0	+
chr17	56418845	56418909	mmu-mir-6977	0	-
chr17	57217171	57217228	mmu-mir-6978	0	-
chr17	64440805	64440907	mmu-mir-6420	0	+
chr17	67026146	67026235	mmu-mir-5709	0	-
chr17	70860502	70860600	mmu-mir-1195	0	-
chr17	80194911	80194968	mmu-novel-24	0	-
chr17	87220141	87220213	mmu-novel-25	0	-
chr18	6490563	6490646	mmu-mir-1893	0	-
chr18	10782908	10782976	mmu-mir-133a-1	0	-
chr18	10785445	10785567	mmu-mir-1b	0	+
chr18	10785480	10785552	mmu-mir-1a-2	0	-
chr18	11840360	11840438	mmu-mir-1901	0	-
chr18	12714810	12714895	mmu-mir-1948	0	+
chr18	23774863	23774989	mmu-mir-6360	0	-
chr18	24429109	24429170	mmu-mir-187	0	-
chr18	32880572	32880673	mmu-mir-6361	0	-
chr18	34759518	34759597	mmu-novel-26	0	+
chr18	35554566	35554636	mmu-mir-1949	0	+
chr18	37854604	37854660	mmu-mir-6979	0	-
chr18	37974502	37974617	mmu-mir-6981	0	-
chr18	37990886	37990945	mmu-mir-6980	0	-
chr18	56538138	56538198	mmu-mir-1258	0	+
chr18	59579629	59579735	mmu-mir-6355	0	+
chr18	60812075	60812163	mmu-mir-5107	0	+
chr18	60953872	60953932	mmu-mir-7220	0	+
chr18	60958072	60958140	mmu-mir-6982	0	+
chr18	61117467	61117531	mmu-mir-6983	0	+
chr18	61397834	61397900	mmu-mir-378a	0	-
chr18	61647824	61647894	mmu-mir-145a	0	-
chr18	61649195	61649258	mmu-mir-143	0	-
chr18	65248860	65248926	mmu-mir-122	0	+
chr18	65248862	65248921	mmu-novel-27	0	-
chr18	66219263	66219333	mmu-mir-694	0	-
chr18	68260919	68260973	mmu-mir-7219	0	-
chr18	68739399	68739501	mmu-mir-6356	0	+
chr18	69022198	69022273	mmu-mir-145b	0	-
chr18	70516785	70516889	mmu-mir-6357	0	+
chr18	76170551	76170652	mmu-mir-6358	0	+
chr18	81992009	81992080	mmu-mir-5127	0	-
chr18	82720280	82720340	mmu-mir-5112	0	+
chr18	88972029	88972110	mmu-mir-6359	0	+
chr19	3288919	3288983	mmu-mir-6984	0	+
chr19	3850766	3850816	mmu-novel-28	0	-
chr19	4263817	4263878	mmu-mir-6985	0	-
chr19	4623897	4623955	mmu-mir-6986	0	-
chr19	5679003	5679076	mmu-mir-6987	0	-
chr19	6051333	6051392	mmu-mir-6988	0	+
chr19	6134800	6134863	mmu-novel-29	0	-
chr19	6264642	6264728	mmu-mir-194-2	0	+
chr19	6264843	6264932	mmu-mir-192	0	+
chr19	6346479	6346544	mmu-mir-6989	0	+
chr19	6829885	6829944	mmu-mir-5046	0	-
chr19	6914195	6914286	mmu-mir-6990	0	-
chr19	7422572	7422642	mmu-mir-6991	0	+
chr19	8742970	8743079	mmu-mir-6992	0	+
chr19	8888698	8888774	mmu-mir-5136	0	-
chr19	10191374	10191439	mmu-mir-6993	0	+
chr19	11923727	11923800	mmu-mir-6994	0	+
chr19	16314891	16315004	mmu-mir-496b	0	-
chr19	22750604	22750672	mmu-mir-204	0	+
chr19	23149430	23149551	mmu-mir-1192	0	+
chr19	24942234	24942303	mmu-mir-3084-1	0	-
chr19	29135278	29135375	mmu-mir-101b	0	+
chr19	33157111	33157201	mmu-mir-3970	0	+
chr19	34820686	34820773	mmu-mir-107	0	-
chr19	34965395	34965469	mmu-mir-1950	0	+
chr19	40894702	40894789	mmu-mir-8092	0	+
chr19	41588650	41588789	mmu-mir-8091	0	+
chr19	42280081	42280170	mmu-mir-3085	0	-
chr19	44303170	44303231	mmu-mir-5114	0	+
chr19	44808405	44808529	mmu-mir-6405	0	+
chr19	46342761	46342870	mmu-mir-146b	0	+
chr19	47273518	47273589	mmu-mir-6995	0	-
chr19	47755021	47755157	mmu-mir-8090	0	-
chr19	53010655	53010756	mmu-mir-6407	0	-
chr19	55112918	55112976	mmu-novel-30	0	-
chr19	55192677	55192734	mmu-mir-6715	0	+
chr19	58051166	58051236	mmu-mir-5623	0	+
chr19	58911672	58911759	mmu-mir-3086	0	-
chr19	60774328	60774397	mmu-mir-3084-2	0	-
chr2	10466662	10466746	mmu-mir-466m	0	+
chr2	10466943	10467037	mmu-mir-466f-1	0	+
chr2	10467228	10467349	mmu-mir-669f	0	+
chr2	10467494	10467613	mmu-mir-669e	0	+
chr2	10467789	10467886	mmu-mir-669b	0	+
chr2	10468342	10468463	mmu-mir-669d	0	+
chr2	10468674	10468768	mmu-mir-466f-2	0	+
chr2	10468970	10469068	mmu-mir-669l	0	+
chr2	10471643	10471729	mmu-mir-669d-2	0	+
chr2	10471952	10472046	mmu-mir-466f-3	0	+
chr2	10472253	10472343	mmu-mir-297a-2	0	+
chr2	10472539	10472623	mmu-mir-466o	0	+
chr2	10473930	10474027	mmu-mir-467c	0	+
chr2	10474218	10474300	mmu-mir-466b-1	0	+
chr2	10474432	10474541	mmu-mir-669a-3	0	+
chr2	10475299	10475426	mmu-mir-669k	0	+
chr2	10476345	10476418	mmu-mir-467a-1	0	+
chr2	10476627	10476713	mmu-mir-466b-8	0	+
chr2	10476852	10476949	mmu-mir-669a-1	0	+
chr2	10477149	10477272	mmu-mir-669g	0	+
chr2	10477909	10478030	mmu-mir-669j	0	+
chr2	10478797	10478880	mmu-mir-467a-2	0	+
chr2	10479087	10479171	mmu-mir-466e	0	+
chr2	10479314	10479401	mmu-mir-669a-4	0	+
chr2	10481247	10481320	mmu-mir-467b	0	+
chr2	10481533	10481617	mmu-mir-466c-1	0	+
chr2	10481760	10481847	mmu-mir-669a-5	0	+
chr2	10483677	10483760	mmu-mir-467a-3	0	+
chr2	10483965	10484055	mmu-mir-466c-2	0	+
chr2	10484195	10484282	mmu-mir-669a-6	0	+
chr2	10486134	10486217	mmu-mir-467a-4	0	+
chr2	10486422	10486512	mmu-mir-466b-4	0	+
chr2	10486652	10486739	mmu-mir-669a-7	0	+
chr2	10488598	10488681	mmu-mir-467a-5	0	+
chr2	10488886	10488974	mmu-mir-466b-5	0	+
chr2	10489115	10489202	mmu-mir-669p-1	0	+
chr2	10491047	10491130	mmu-mir-467a-6	0	+
chr2	10491335	10491425	mmu-mir-466c-3	0	+
chr2	10491565	10491652	mmu-mir-669a-8	0	+
chr2	10493509	10493592	mmu-mir-467a-7	0	+
chr2	10493797	10493887	mmu-mir-466b-6	0	+
chr2	10494027	10494114	mmu-mir-669a-9	0	+
chr2	10495979	10496062	mmu-mir-467a-8	0	+
chr2	10496267	10496355	mmu-mir-466b-7	0	+
chr2	10496496	10496583	mmu-mir-669p-2	0	+
chr2	10498392	10498475	mmu-mir-467a-9	0	+
chr2	10498684	10498766	mmu-mir-466b-2	0	+
chr2	10498910	10498997	mmu-mir-669a-10	0	+
chr2	10500821	10500904	mmu-mir-467a-2_M1	0	+
chr2	10500821	10500904	mmu-mir-467a-5_M1	0	+
chr2	10500821	10500904	mmu-mir-467a-4_M1	0	+
chr2	10500821	10500904	mmu-mir-467a-8_M1	0	+
chr2	10500821	10500904	mmu-mir-467a-7_M1	0	+
chr2	10500821	10500904	mmu-mir-467a-9_M1	0	+
chr2	10500826	10500899	mmu-mir-467a-1_M1	0	+
chr2	10501108	10501198	mmu-mir-466b-4_M1	0	+
chr2	10501108	10501198	mmu-mir-466b-6_M1	0	+
chr2	10501110	10501198	mmu-mir-466b-5_M1	0	+
chr2	10501110	10501198	mmu-mir-466b-7_M1	0	+
chr2	10501112	10501194	mmu-mir-466b-1_M1	0	+
chr2	10501338	10501425	mmu-mir-669a-11	0	+
chr2	10503272	10503355	mmu-mir-467a-10	0	+
chr2	10503564	10503645	mmu-mir-466b-3	0	+
chr2	10503790	10503877	mmu-mir-669a-12	0	+
chr2	10505720	10505807	mmu-mir-467e	0	+
chr2	10506005	10506094	mmu-mir-466p	0	+
chr2	10507629	10507714	mmu-mir-467d	0	+
chr2	10507917	10507990	mmu-mir-466a	0	+
chr2	10509015	10509113	mmu-mir-297c	0	+
chr2	10509295	10509404	mmu-mir-669c	0	+
chr2	10510163	10510260	mmu-mir-669a-2	0	+
chr2	10511666	10511775	mmu-mir-297b	0	+
chr2	10511966	10512062	mmu-mir-466d	0	+
chr2	10512202	10512299	mmu-mir-669a-1_M1	0	+
chr2	10512206	10512293	mmu-mir-669a-4_M1	0	+
chr2	10512206	10512293	mmu-mir-669a-11_M1	0	+
chr2	10512206	10512293	mmu-mir-669a-5_M1	0	+
chr2	10512206	10512293	mmu-mir-669a-12_M1	0	+
chr2	10512206	10512293	mmu-mir-669a-9_M1	0	+
chr2	10512206	10512293	mmu-mir-669a-8_M1	0	+
chr2	10512206	10512293	mmu-mir-669a-10_M1	0	+
chr2	10512206	10512293	mmu-mir-669a-7_M1	0	+
chr2	10512206	10512293	mmu-mir-669a-6_M1	0	+
chr2	10512789	10512887	mmu-mir-669m-1	0	+
chr2	10513433	10513531	mmu-mir-669m-2	0	+
chr2	10513740	10513834	mmu-mir-466n	0	+
chr2	10514299	10514395	mmu-mir-669o	0	+
chr2	10514594	10514674	mmu-mir-466g	0	+
chr2	10514890	10514971	mmu-mir-466h	0	+
chr2	10515819	10515921	mmu-mir-297a-3	0	+
chr2	10516096	10516217	mmu-mir-466l	0	+
chr2	10517066	10517164	mmu-mir-297a-4	0	+
chr2	10517603	10517730	mmu-mir-669i	0	+
chr2	10518154	10518279	mmu-mir-669h	0	+
chr2	14261002	14261081	mmu-mir-511	0	+
chr2	17563513	17563626	mmu-mir-6419	0	+
chr2	18057845	18057903	mmu-mir-7655	0	+
chr2	22654282	22654350	mmu-mir-3967	0	+
chr2	25059810	25059873	mmu-mir-7664	0	+
chr2	25442778	25442834	mmu-mir-3087	0	+
chr2	26470058	26470119	mmu-mir-6996	0	-
chr2	26591356	26591429	mmu-mir-126a	0	+
chr2	26591362	26591420	mmu-mir-126b	0	-
chr2	27450548	27450630	mmu-mir-7578	0	-
chr2	28733277	28733351	mmu-mir-3088	0	+
chr2	29475214	29475294	mmu-mir-133c	0	-
chr2	29845630	29845727	mmu-mir-219a-2	0	-
chr2	29845646	29845711	mmu-mir-219b	0	+
chr2	29995949	29996020	mmu-mir-6997	0	+
chr2	30721209	30721293	mmu-mir-3089	0	+
chr2	31612420	31612484	mmu-mir-6998	0	+
chr2	32050945	32051008	mmu-mir-7674	0	+
chr2	32318264	32318343	mmu-mir-3154	0	+
chr2	32318459	32318569	mmu-mir-199b	0	+
chr2	32652328	32652414	mmu-mir-1954	0	+
chr2	32687629	32687766	mmu-mir-8093	0	-
chr2	32712806	32712888	mmu-mir-2861	0	-
chr2	32712899	32712972	mmu-mir-3960	0	-
chr2	37688200	37688284	mmu-mir-5128	0	-
chr2	38852734	38852810	mmu-mir-181a-2	0	+
chr2	38853829	38853918	mmu-mir-181b-2	0	+
chr2	42447438	42447568	mmu-mir-6336	0	-
chr2	45023099	45023177	mmu-mir-5129	0	-
chr2	56785810	56785907	mmu-mir-195b	0	+
chr2	65364295	65364400	mmu-mir-6337	0	-
chr2	67675456	67675516	mmu-mir-7224	0	+
chr2	67781042	67781140	mmu-mir-6335	0	+
chr2	74726069	74726137	mmu-mir-10b	0	+
chr2	80628704	80628790	mmu-mir-684-1	0	-
chr2	84741114	84741178	mmu-mir-130a	0	-
chr2	91944869	91944930	mmu-mir-6999	0	-
chr2	92191976	92192074	mmu-mir-1955	0	+
chr2	92387383	92387446	mmu-mir-7000	0	-
chr2	92592205	92592277	mmu-mir-7221	0	+
chr2	92594601	92594676	mmu-mir-7222	0	+
chr2	93421928	93422007	mmu-mir-7001	0	-
chr2	94241363	94241453	mmu-mir-129-2	0	-
chr2	94241377	94241442	mmu-mir-129b	0	+
chr2	94261299	94261399	mmu-mir-670	0	-
chr2	104428860	104428940	mmu-mir-1902	0	-
chr2	114150515	114150570	mmu-mir-7002	0	-
chr2	115638724	115638813	mmu-mir-1951	0	+
chr2	117185126	117185226	mmu-mir-674	0	+
chr2	120017516	120017579	mmu-mir-7665	0	+
chr2	122640802	122640881	mmu-mir-147	0	+
chr2	126902249	126902385	mmu-mir-3473g	0	-
chr2	130016291	130016408	mmu-mir-6339	0	-
chr2	130276305	130276364	mmu-novel-32	0	+
chr2	131040318	131040398	mmu-mir-6973b	0	-
chr2	131288051	131288137	mmu-mir-103-2	0	+
chr2	133564707	133564794	mmu-mir-3090	0	+
chr2	138819928	138820007	mmu-mir-1952	0	+
chr2	151967528	151967617	mmu-mir-1953	0	-
chr2	152865066	152865126	mmu-mir-5622	0	+
chr2	155356816	155356925	mmu-mir-695	0	+
chr2	155622879	155622958	mmu-mir-499	0	+
chr2	158243503	158243565	mmu-mir-7685	0	-
chr2	158638582	158638640	mmu-mir-3474	0	+
chr2	163068089	163068155	mmu-mir-7003	0	+
chr2	164354312	164354383	mmu-mir-7678	0	-
chr2	168640695	168640759	mmu-mir-7004	0	-
chr2	173701029	173701148	mmu-mir-6340	0	-
chr2	174267046	174267125	mmu-mir-296	0	-
chr2	174267503	174267585	mmu-mir-298	0	-
chr2	180179754	180179823	mmu-mir-7005	0	-
chr2	180257535	180257611	mmu-mir-3091	0	+
chr2	180389047	180389124	mmu-mir-1a-1	0	+
chr2	180398378	180398482	mmu-mir-133a-2	0	+
chr2	180894039	180894107	mmu-mir-124-3	0	+
chr2	181587899	181587968	mmu-mir-7006	0	-
chr3	17795661	17795770	mmu-mir-124-2	0	+
chr3	17795684	17795741	mmu-novel-33	0	-
chr3	20222289	20222359	mmu-mir-7007	0	-
chr3	27584899	27584995	mmu-mir-3092	0	-
chr3	28419942	28420018	mmu-mir-466q	0	+
chr3	29416822	29416920	mmu-mir-551b	0	+
chr3	29636743	29636851	mmu-mir-21b	0	+
chr3	31038965	31039028	mmu-mir-7008	0	+
chr3	34638463	34638542	mmu-mir-1897	0	+
chr3	34922544	34922651	mmu-mir-6378	0	-
chr3	36475460	36475524	mmu-mir-7009	0	-
chr3	46900667	46900782	mmu-mir-6379	0	-
chr3	55887283	55887339	mmu-novel-34	0	-
chr3	57317446	57317511	mmu-novel-35	0	-
chr3	57616608	57616722	mmu-mir-6377	0	+
chr3	65659287	65659426	mmu-mir-8120	0	+
chr3	69009771	69009835	mmu-mir-15b	0	+
chr3	69009901	69009996	mmu-mir-16-2	0	+
chr3	82106246	82106309	mmu-mir-7010	0	-
chr3	85467376	85467498	mmu-mir-466k	0	+
chr3	88215170	88215257	mmu-mir-3093	0	+
chr3	88215597	88215686	mmu-mir-9-1	0	+
chr3	88215612	88215670	mmu-novel-36	0	-
chr3	88440878	88440951	mmu-mir-7011	0	-
chr3	88536300	88536382	mmu-mir-1905	0	-
chr3	88632210	88632276	mmu-novel-37	0	+
chr3	89227115	89227198	mmu-mir-92b	0	-
chr3	90011152	90011210	mmu-mir-7669	0	-
chr3	90070019	90070099	mmu-mir-190b	0	+
chr3	90270148	90270212	mmu-mir-7012	0	+
chr3	95004167	95004239	mmu-mir-7013	0	+
chr3	95139059	95139186	mmu-mir-8099-1	0	-
chr3	95734910	95734973	mmu-mir-7014	0	-
chr3	97690508	97690562	mmu-mir-7225	0	-
chr3	99199343	99199453	mmu-mir-6481	0	-
chr3	115979901	115979955	mmu-mir-669n	0	+
chr3	116667556	116667617	mmu-novel-38	0	-
chr3	118433856	118433929	mmu-mir-137	0	+
chr3	122293584	122293703	mmu-mir-760	0	-
chr3	122541624	122541681	mmu-mir-7657	0	-
chr3	127545227	127545301	mmu-mir-302b	0	+
chr3	127545362	127545430	mmu-mir-302c	0	+
chr3	127545495	127545564	mmu-mir-302a	0	+
chr3	127545623	127545689	mmu-mir-302d	0	+
chr3	127545732	127545807	mmu-mir-367	0	+
chr3	134240504	134240583	mmu-mir-1895	0	-
chr3	137783534	137783615	mmu-mir-6380	0	-
chr3	138526420	138526485	mmu-mir-1956	0	+
chr3	140028248	140028370	mmu-let-7j	0	+
chr3	142623859	142623946	mmu-mir-6381	0	-
chr3	151023791	151023862	mmu-mir-3963	0	-
chr3	157544278	157544349	mmu-mir-186	0	+
chr4	3537089	3537191	mmu-mir-3471-2	0	+
chr4	10845499	10845630	mmu-mir-3471-1	0	-
chr4	11134096	11134182	mmu-mir-684-2	0	+
chr4	15942899	15942991	mmu-mir-6400	0	-
chr4	33438080	33438209	mmu-mir-8118	0	+
chr4	36645372	36645453	mmu-mir-876	0	-
chr4	36668509	36668586	mmu-mir-873a	0	-
chr4	36668509	36668586	mmu-mir-873b	0	+
chr4	40722916	40722995	mmu-mir-207	0	+
chr4	40850055	40850138	mmu-mir-5123	0	-
chr4	40993694	40993758	mmu-mir-3094	0	+
chr4	44607490	44607568	mmu-mir-5120	0	-
chr4	48213118	48213215	mmu-mir-1958	0	-
chr4	56895228	56895298	mmu-mir-32	0	-
chr4	58441011	58441098	mmu-mir-3095	0	-
chr4	63256850	63256932	mmu-mir-455	0	+
chr4	88122039	88122125	mmu-mir-491	0	+
chr4	88910556	88910662	mmu-mir-31	0	-
chr4	91373283	91373363	mmu-mir-6402	0	-
chr4	93927684	93927746	mmu-novel-40	0	+
chr4	94665156	94665237	mmu-mir-872	0	+
chr4	101346944	101347027	mmu-mir-101a	0	-
chr4	108087356	108087449	mmu-mir-6397	0	+
chr4	109017654	109017730	mmu-mir-761	0	+
chr4	118210504	118210564	mmu-mir-7226	0	-
chr4	119129778	119129844	mmu-mir-1957a	0	+
chr4	120769533	120769622	mmu-mir-30c-1	0	-
chr4	120772605	120772697	mmu-mir-30e	0	-
chr4	120772605	120772697	mmu-mir-30f	0	+
chr4	120973258	120973322	mmu-mir-7015	0	-
chr4	123293213	123293282	mmu-novel-41	0	+
chr4	123616419	123616521	mmu-mir-6398	0	+
chr4	124731693	124731802	mmu-mir-697	0	+
chr4	124743780	124743889	mmu-mir-698	0	+
chr4	125504748	125504857	mmu-mir-692-2	0	+
chr4	126559859	126559918	mmu-mir-7119	0	+
chr4	129214599	129214673	mmu-novel-42	0	+
chr4	129557682	129557811	mmu-mir-8119	0	-
chr4	129684499	129684571	mmu-mir-7016	0	-
chr4	132310003	132310069	mmu-novel-43	0	+
chr4	133195654	133195716	mmu-mir-7017	0	+
chr4	133369775	133369864	mmu-mir-5122	0	+
chr4	133717049	133717108	mmu-mir-7227	0	-
chr4	134567722	134567851	mmu-mir-6403	0	-
chr4	135416554	135416633	mmu-mir-700	0	-
chr4	137538285	137538370	mmu-mir-7018	0	+
chr4	138163208	138163292	mmu-mir-6399	0	+
chr4	138316131	138316200	mmu-mir-7019	0	-
chr4	139644041	139644111	mmu-mir-7020	0	+
chr4	139967525	139967620	mmu-mir-2139	0	-
chr4	143136099	143136162	mmu-mir-7021	0	-
chr4	148146935	148146996	mmu-mir-7022	0	-
chr4	149537862	149537922	mmu-mir-5616	0	+
chr4	149655503	149655567	mmu-mir-7023	0	-
chr4	150068453	150068555	mmu-mir-34a	0	+
chr4	150797897	150797952	mmu-novel-44	0	-
chr4	156053904	156053987	mmu-mir-429	0	-
chr4	156054895	156054985	mmu-mir-200a	0	-
chr4	156055680	156055750	mmu-mir-200b	0	-
chr4	156230058	156230115	mmu-mir-7658	0	-
chr5	9375703	9375779	mmu-mir-879	0	+
chr5	21673872	21673929	mmu-novel-45	0	-
chr5	24592113	24592211	mmu-mir-671	0	+
chr5	30170738	30170816	mmu-mir-1960	0	+
chr5	30647935	30648015	mmu-mir-5625	0	+
chr5	31667230	31667340	mmu-mir-3473e	0	-
chr5	32092722	32092784	mmu-novel-46	0	+
chr5	33898909	33898971	mmu-mir-7024	0	-
chr5	34574150	34574213	mmu-mir-7036b	0	+
chr5	34732852	34732972	mmu-mir-467g	0	-
chr5	35021048	35021115	mmu-mir-3097	0	+
chr5	36301569	36301628	mmu-mir-7689	0	+
chr5	41891341	41891423	mmu-mir-6414	0	+
chr5	48223941	48224051	mmu-mir-218-1	0	+
chr5	50252761	50252868	mmu-mir-8117	0	+
chr5	52135901	52136017	mmu-mir-6417	0	-
chr5	64970317	64970395	mmu-mir-574	0	+
chr5	75176830	75176904	mmu-mir-7025	0	+
chr5	77084514	77084577	mmu-novel-47	0	-
chr5	77272756	77272838	mmu-mir-5098	0	+
chr5	82798943	82799065	mmu-mir-1187	0	-
chr5	87595901	87595993	mmu-mir-3969	0	-
chr5	92458556	92458656	mmu-mir-6415	0	+
chr5	92788450	92788562	mmu-mir-1961	0	-
chr5	98475555	98475664	mmu-mir-703	0	-
chr5	104048002	104048063	mmu-mir-5619	0	+
chr5	110666074	110666141	mmu-mir-7026	0	-
chr5	111004143	111004252	mmu-mir-701	0	+
chr5	113324492	113324545	mmu-mir-7229	0	-
chr5	113337589	113337645	mmu-mir-7230	0	-
chr5	114404467	114404539	mmu-mir-7027	0	+
chr5	114719514	114719578	mmu-mir-7028	0	+
chr5	115580948	115581009	mmu-mir-7029	0	+
chr5	115645572	115645632	mmu-mir-7030	0	+
chr5	121819208	121819273	mmu-mir-7031	0	-
chr5	122682596	122682715	mmu-mir-8115	0	+
chr5	123522636	123522695	mmu-mir-7647	0	-
chr5	123996851	123996930	mmu-mir-7032	0	+
chr5	125781682	125781738	mmu-novel-48	0	+
chr5	134326453	134326522	mmu-mir-3965	0	+
chr5	134572075	134572114	mmu-mir-7228	0	+
chr5	135383729	135383810	mmu-mir-7033	0	-
chr5	135735805	135735889	mmu-mir-7034	0	-
chr5	136105521	136105603	mmu-mir-7035	0	+
chr5	136375715	136375803	mmu-mir-721	0	-
chr5	136991432	136991541	mmu-mir-702	0	+
chr5	137293779	137293876	mmu-mir-8116	0	+
chr5	137296623	137296688	mmu-mir-7036a	0	-
chr5	137529479	137529594	mmu-mir-6418	0	-
chr5	138165320	138165404	mmu-mir-25	0	-
chr5	138165522	138165610	mmu-mir-93	0	-
chr5	138165736	138165818	mmu-mir-106b	0	-
chr5	139369649	139369745	mmu-mir-339	0	-
chr5	139767878	139767943	mmu-mir-7037	0	-
chr5	140427338	140427409	mmu-mir-7038	0	+
chr5	144896731	144896816	mmu-mir-7039	0	-
chr5	147283188	147283298	mmu-let-7k	0	-
chr6	3721300	3721385	mmu-mir-653	0	-
chr6	3721896	3722003	mmu-mir-489	0	-
chr6	19555341	19555461	mmu-mir-6370	0	+
chr6	27936654	27936750	mmu-mir-592	0	-
chr6	29022618	29022691	mmu-mir-129-1	0	+
chr6	30165917	30165992	mmu-mir-182	0	-
chr6	30169445	30169551	mmu-mir-96	0	-
chr6	30169667	30169737	mmu-mir-183	0	-
chr6	30741298	30741396	mmu-mir-335	0	+
chr6	31062659	31062747	mmu-mir-29a	0	-
chr6	31063022	31063093	mmu-mir-29b-1	0	-
chr6	36421741	36421825	mmu-mir-490	0	+
chr6	38507324	38507393	mmu-mir-7670	0	+
chr6	47803575	47803652	mmu-mir-704	0	-
chr6	50572397	50572508	mmu-mir-6371	0	+
chr6	51269811	51269910	mmu-mir-148a	0	-
chr6	52230080	52230165	mmu-mir-196b	0	-
chr6	71271670	71271801	mmu-mir-8112	0	+
chr6	71882637	71882692	mmu-novel-49	0	-
chr6	81895589	81895663	mmu-mir-7232	0	-
chr6	81896598	81896676	mmu-mir-468	0	-
chr6	83049710	83049773	mmu-mir-7040	0	+
chr6	83090310	83090387	mmu-mir-3470a	0	-
chr6	83400995	83401102	mmu-mir-6374	0	-
chr6	85336291	85336373	mmu-mir-705	0	-
chr6	85790139	85790234	mmu-mir-6375	0	-
chr6	88104127	88104258	mmu-mir-6376	0	-
chr6	94606363	94606415	mmu-mir-7041	0	-
chr6	99184961	99185019	mmu-novel-50	0	-
chr6	102794383	102794485	mmu-mir-6373	0	+
chr6	108489742	108489803	mmu-mir-7661	0	+
chr6	113707207	113707265	mmu-mir-7042	0	+
chr6	115775656	115775719	mmu-mir-7660	0	+
chr6	116645977	116646047	mmu-mir-7043	0	-
chr6	118085191	118085263	mmu-mir-7044	0	+
chr6	120034227	120034311	mmu-mir-706	0	-
chr6	122831376	122831437	mmu-mir-7231	0	+
chr6	124717913	124717985	mmu-mir-141	0	-
chr6	124718321	124718390	mmu-mir-200c	0	-
chr6	125097023	125097086	mmu-mir-7045	0	+
chr6	125195791	125195878	mmu-mir-3098	0	+
chr6	125234683	125234812	mmu-mir-8113	0	-
chr6	127788083	127788143	mmu-mir-7233	0	-
chr6	128974839	128974895	mmu-mir-7649	0	-
chr6	129691534	129691643	mmu-mir-680-1	0	+
chr7	3218625	3218708	mmu-mir-290a	0	+
chr7	3218637	3218695	mmu-mir-290b	0	-
chr7	3218918	3219000	mmu-mir-291a	0	+
chr7	3219188	3219270	mmu-mir-292a	0	+
chr7	3219197	3219259	mmu-mir-292b	0	-
chr7	3219481	3219560	mmu-mir-291b	0	+
chr7	3220342	3220422	mmu-mir-293	0	+
chr7	3220640	3220724	mmu-mir-294	0	+
chr7	3220772	3220841	mmu-mir-295	0	+
chr7	3415065	3415156	mmu-mir-935	0	+
chr7	3655961	3656047	mmu-mir-3572	0	+
chr7	4917964	4918030	mmu-novel-51	0	+
chr7	6803586	6803670	mmu-mir-3099	0	+
chr7	7298890	7298946	mmu-mir-5620	0	+
chr7	7298890	7298947	mmu-novel-52	0	-
chr7	10958436	10958512	mmu-mir-297a-1	0	-
chr7	19086827	19086892	mmu-mir-3100	0	+
chr7	19181464	19181562	mmu-mir-330	0	+
chr7	19386642	19386717	mmu-mir-343	0	+
chr7	24970009	24970075	mmu-mir-7046	0	-
chr7	24987603	24987667	mmu-mir-7047	0	-
chr7	25097065	25097175	mmu-mir-6537	0	-
chr7	25217667	25217725	mmu-mir-7048	0	-
chr7	27176005	27176093	mmu-mir-3101	0	-
chr7	27205535	27205655	mmu-mir-1191a	0	+
chr7	28351506	28351565	mmu-novel-53	0	+
chr7	28560924	28560984	mmu-mir-7049	0	-
chr7	29083635	29083694	mmu-mir-1963	0	-
chr7	29773293	29773376	mmu-mir-1964	0	+
chr7	29906508	29906567	mmu-mir-7668	0	+
chr7	30552827	30552904	mmu-mir-9769	0	+
chr7	30589379	30589437	mmu-mir-3569	0	+
chr7	31040257	31040317	mmu-mir-7050	0	-
chr7	43457496	43457569	mmu-mir-7051	0	+
chr7	44470346	44470411	mmu-mir-7052	0	+
chr7	44538105	44538178	mmu-mir-7053	0	-
chr7	44849698	44849771	mmu-mir-707	0	+
chr7	45012425	45012487	mmu-mir-7054	0	-
chr7	45121756	45121821	mmu-mir-150	0	+
chr7	45126917	45126991	mmu-mir-5121	0	-
chr7	45173302	45173361	mmu-mir-7055	0	+
chr7	47083165	47083224	mmu-mir-7056	0	-
chr7	53891760	53891889	mmu-mir-6238	0	-
chr7	57581060	57581162	mmu-mir-6389	0	+
chr7	61683123	61683192	mmu-mir-344d-1	0	-
chr7	61685271	61685351	mmu-mir-344d-2	0	-
chr7	61726248	61726328	mmu-mir-344d-3	0	-
chr7	61735536	61735602	mmu-mir-344e	0	-
chr7	61739349	61739409	mmu-mir-344h-1	0	-
chr7	61742365	61742425	mmu-mir-344h-2	0	-
chr7	61790518	61790581	mmu-mir-344b	0	-
chr7	61837310	61837402	mmu-mir-344c	0	-
chr7	61877769	61877864	mmu-mir-344-1	0	-
chr7	61940026	61940106	mmu-mir-344-2	0	-
chr7	61982288	61982359	mmu-mir-344g	0	-
chr7	62046180	62046248	mmu-mir-344f	0	-
chr7	62085222	62085310	mmu-mir-344i	0	-
chr7	64205805	64205911	mmu-mir-211	0	+
chr7	64249982	64250099	mmu-mir-6416	0	-
chr7	66381666	66381724	mmu-mir-7057	0	-
chr7	73819589	73819641	mmu-mir-7234	0	+
chr7	78888276	78888373	mmu-mir-7a-2	0	+
chr7	79505263	79505353	mmu-mir-9-3	0	+
chr7	79505278	79505336	mmu-novel-54	0	-
chr7	81529915	81529988	mmu-mir-1839	0	+
chr7	81613305	81613368	mmu-novel-55	0	-
chr7	96249423	96249532	mmu-mir-708	0	+
chr7	96305666	96305765	mmu-mir-6394	0	+
chr7	99552268	99552363	mmu-mir-326	0	+
chr7	100882305	100882409	mmu-mir-3102	0	-
chr7	101475375	101475443	mmu-mir-139	0	+
chr7	126367970	126368045	mmu-mir-7058	0	-
chr7	126579473	126579532	mmu-mir-7059	0	-
chr7	127489250	127489387	mmu-mir-7060	0	+
chr7	127527938	127527999	mmu-novel-56	0	+
chr7	127708486	127708562	mmu-mir-762	0	+
chr7	128288368	128288435	mmu-mir-3103	0	-
chr7	130908267	130908335	mmu-mir-7061	0	+
chr7	135566161	135566282	mmu-mir-1962	0	+
chr7	139779017	139779126	mmu-mir-6401	0	+
chr7	139957565	139957622	mmu-mir-7686	0	-
chr7	139957688	139957760	mmu-mir-202	0	-
chr7	139986808	139986874	mmu-mir-7062	0	-
chr7	141221383	141221493	mmu-mir-210	0	-
chr7	141620700	141620791	mmu-mir-7063	0	+
chr7	141992178	141992241	mmu-mir-3104	0	+
chr7	142577063	142577147	mmu-mir-675	0	-
chr7	142654923	142654996	mmu-mir-483	0	-
chr7	143570670	143570759	mmu-mir-7064	0	-
chr7	143933114	143933208	mmu-mir-6404	0	+
chr7	144009253	144009338	mmu-mir-3105	0	+
chr8	8690092	8690162	mmu-mir-7654	0	-
chr8	11635693	11635736	mmu-mir-7238	0	-
chr8	12947940	12948070	mmu-mir-9768	0	+
chr8	13136071	13136132	mmu-mir-7065	0	+
chr8	13189030	13189098	mmu-mir-1968	0	-
chr8	16168756	16168838	mmu-mir-3106	0	-
chr8	21594042	21594098	mmu-novel-57	0	-
chr8	23142554	23142682	mmu-mir-486a	0	+
chr8	23142572	23142662	mmu-mir-486b	0	-
chr8	25159124	25159233	mmu-mir-8108	0	-
chr8	34166621	34166712	mmu-mir-6395	0	-
chr8	38252132	38252202	mmu-mir-383	0	-
chr8	40307874	40307929	mmu-mir-7666	0	-
chr8	64514331	64514441	mmu-mir-710	0	-
chr8	70102523	70102586	mmu-mir-7066	0	-
chr8	70798134	70798192	mmu-mir-7240	0	+
chr8	70895507	70895570	mmu-mir-7067	0	-
chr8	70925524	70925618	mmu-mir-1969	0	+
chr8	71631046	71631106	mmu-mir-6769b	0	-
chr8	72470015	72470089	mmu-mir-7068	0	-
chr8	73016511	73016591	mmu-mir-28b	0	+
chr8	83723877	83723984	mmu-mir-1668	0	-
chr8	84005627	84005764	mmu-mir-8111	0	+
chr8	84011514	84011633	mmu-mir-1199	0	-
chr8	84086098	84086186	mmu-mir-709	0	+
chr8	84178715	84178787	mmu-mir-181d	0	-
chr8	84178872	84178961	mmu-mir-181c	0	-
chr8	84208517	84208592	mmu-mir-23a	0	+
chr8	84208671	84208758	mmu-mir-27a	0	+
chr8	84208814	84208921	mmu-mir-24-2	0	+
chr8	84208824	84208907	mmu-mir-3074-2	0	-
chr8	84867946	84868008	mmu-mir-7069	0	+
chr8	85062085	85062171	mmu-mir-7070	0	+
chr8	85700904	85701021	mmu-mir-8109	0	+
chr8	88138205	88138274	mmu-mir-7071	0	+
chr8	89024734	89024831	mmu-mir-8110	0	+
chr8	94324310	94324381	mmu-mir-138-2	0	+
chr8	94505045	94505105	mmu-mir-7072	0	+
chr8	95753150	95753214	mmu-mir-7073	0	-
chr8	105308363	105308460	mmu-mir-328	0	-
chr8	105615465	105615573	mmu-mir-1966	0	+
chr8	105951636	105951699	mmu-mir-7074	0	-
chr8	107096024	107096106	mmu-mir-7075	0	-
chr8	107551243	107551313	mmu-mir-140	0	+
chr8	108936859	108936938	mmu-mir-3108	0	+
chr8	111016449	111016530	mmu-mir-3473d	0	-
chr8	111450199	111450322	mmu-mir-1957b	0	+
chr8	111689600	111689674	mmu-mir-7076	0	-
chr8	117453022	117453079	mmu-mir-7077	0	+
chr8	117459264	117459328	mmu-mir-7078	0	+
chr8	120538695	120538754	mmu-mir-7687	0	+
chr8	121978023	121978086	mmu-mir-7237	0	+
chr8	122622264	122622375	mmu-mir-6396	0	-
chr8	123104974	123105043	mmu-mir-7079	0	+
chr8	123130105	123130172	mmu-mir-7080	0	+
chr8	124022640	124022722	mmu-mir-1967	0	+
chr8	128278147	128278225	mmu-mir-21c	0	-
chr8	128359240	128359320	mmu-mir-1903	0	+
chr9	3038668	3038743	mmu-mir-101c	0	-
chr9	7784389	7784440	mmu-mir-5618	0	+
chr9	8246785	8246881	mmu-mir-1899	0	+
chr9	9894430	9894521	mmu-mir-6237	0	+
chr9	14180026	14180072	mmu-novel-58	0	-
chr9	15312610	15312669	mmu-mir-7650	0	+
chr9	20914089	20914164	mmu-mir-7081	0	-
chr9	21032250	21032328	mmu-mir-1900	0	-
chr9	21075496	21075588	mmu-mir-7082	0	-
chr9	21496494	21496564	mmu-mir-199a-1	0	-
chr9	21613443	21613576	mmu-mir-1946b	0	-
chr9	21809940	21810000	mmu-mir-7083	0	-
chr9	22113943	22114013	mmu-mir-7084	0	-
chr9	41531424	41531504	mmu-mir-100	0	+
chr9	41536731	41536797	mmu-let-7a-2	0	+
chr9	41581925	41582002	mmu-mir-125b-1	0	+
chr9	44400422	44400488	mmu-mir-7085	0	+
chr9	45266642	45266707	mmu-mir-7086	0	-
chr9	45939520	45939590	mmu-mir-7087	0	-
chr9	51103033	51103110	mmu-mir-34c	0	-
chr9	51103561	51103645	mmu-mir-34b	0	-
chr9	51103575	51103634	mmu-novel-59	0	+
chr9	52115622	52115739	mmu-mir-6244	0	+
chr9	53400804	53400886	mmu-mir-130c	0	-
chr9	54708312	54708381	mmu-mir-5710	0	+
chr9	58221149	58221254	mmu-mir-6385	0	+
chr9	62122517	62122594	mmu-mir-5133	0	-
chr9	67236659	67236726	mmu-mir-190a	0	-
chr9	67727716	67727780	mmu-mir-7241	0	-
chr9	67729498	67729577	mmu-mir-7242	0	-
chr9	69456943	69457031	mmu-mir-3109	0	+
chr9	70405693	70405753	mmu-mir-5626	0	-
chr9	74966742	74966802	mmu-novel-60	0	+
chr9	88325743	88325802	mmu-novel-61	0	-
chr9	89802259	89802328	mmu-mir-184	0	-
chr9	92267257	92267361	mmu-mir-6386	0	-
chr9	94751828	94751890	mmu-mir-7656	0	+
chr9	102304923	102304975	mmu-mir-7243	0	-
chr9	104426112	104426187	mmu-mir-2136	0	+
chr9	106154123	106154213	mmu-mir-135a-1	0	+
chr9	106178845	106178923	mmu-let-7g	0	+
chr9	108081497	108081583	mmu-mir-7088	0	+
chr9	108459093	108459160	mmu-novel-62	0	+
chr9	108568318	108568392	mmu-mir-191	0	+
chr9	108568776	108568861	mmu-mir-425	0	+
chr9	108969921	108970003	mmu-mir-711	0	+
chr9	109889642	109889710	mmu-mir-7089	0	+
chr9	110635998	110636115	mmu-mir-8107	0	-
chr9	112118635	112118711	mmu-mir-128-2	0	-
chr9	115381818	115381939	mmu-mir-467h	0	+
chr9	119031795	119031885	mmu-mir-26a-1	0	+
chr9	120955085	120955147	mmu-mir-7090	0	+
chr9	122273889	122274028	mmu-mir-8106	0	-
chr9	122682875	122682974	mmu-mir-138-1	0	+
chrM	6152	6190	mmu-novel-64	0	+
chrX	7237682	7237774	mmu-mir-500	0	-
chrX	7241242	7241351	mmu-mir-501	0	-
chrX	7241981	7242046	mmu-mir-362	0	-
chrX	7247988	7248056	mmu-mir-188	0	-
chrX	7248401	7248497	mmu-mir-532	0	-
chrX	7807100	7807221	mmu-mir-1198	0	+
chrX	19146293	19146388	mmu-mir-221	0	-
chrX	19146892	19146971	mmu-mir-222	0	-
chrX	20863125	20863182	mmu-mir-5617	0	-
chrX	38210440	38210520	mmu-mir-3110	0	+
chrX	52378120	52378181	mmu-mir-6384	0	-
chrX	52422406	52422515	mmu-mir-717	0	-
chrX	52741692	52741767	mmu-mir-363	0	-
chrX	52741837	52741928	mmu-mir-92a-2	0	-
chrX	52741982	52742066	mmu-mir-19b-2	0	-
chrX	52742112	52742192	mmu-mir-20b	0	-
chrX	52742330	52742413	mmu-mir-18b	0	-
chrX	52742502	52742567	mmu-mir-106a	0	-
chrX	53047996	53048078	mmu-mir-450b	0	-
chrX	53048153	53048244	mmu-mir-450a-1	0	-
chrX	53048298	53048367	mmu-mir-450a-2	0	-
chrX	53049402	53049487	mmu-mir-542	0	-
chrX	53053254	53053353	mmu-mir-351	0	-
chrX	53053983	53054054	mmu-mir-503	0	-
chrX	53054254	53054349	mmu-mir-322	0	-
chrX	56587851	56587914	mmu-mir-5116	0	-
chrX	59097657	59097736	mmu-mir-504	0	-
chrX	60394402	60394492	mmu-mir-505	0	-
chrX	66776756	66776818	mmu-mir-743a	0	-
chrX	66777255	66777332	mmu-mir-743b	0	-
chrX	66780372	66780437	mmu-mir-742	0	-
chrX	66780757	66780833	mmu-mir-883a	0	-
chrX	66789889	66789967	mmu-mir-883b	0	-
chrX	66792594	66792661	mmu-mir-471	0	-
chrX	66796804	66796875	mmu-mir-741	0	-
chrX	66799222	66799297	mmu-mir-463	0	-
chrX	66800529	66800607	mmu-mir-880	0	-
chrX	66801507	66801585	mmu-mir-878	0	-
chrX	66801943	66802021	mmu-mir-881	0	-
chrX	66810427	66810504	mmu-mir-871	0	-
chrX	66813950	66814025	mmu-mir-470	0	-
chrX	66822655	66822713	mmu-mir-465d	0	-
chrX	66825954	66826035	mmu-mir-465c-1	0	-
chrX	66829201	66829280	mmu-mir-465b-1	0	-
chrX	66832516	66832597	mmu-mir-465c-2	0	-
chrX	66835763	66835842	mmu-mir-465b-2	0	-
chrX	66839051	66839125	mmu-mir-465a	0	-
chrX	67988095	67988161	mmu-mir-201	0	-
chrX	67988373	67988451	mmu-mir-547	0	-
chrX	68010104	68010179	mmu-mir-509	0	-
chrX	72261030	72261112	mmu-mir-224	0	-
chrX	72262223	72262308	mmu-mir-452	0	-
chrX	72589987	72590094	mmu-mir-767	0	-
chrX	72591499	72591579	mmu-mir-105	0	-
chrX	72992078	72992144	mmu-mir-2137	0	+
chrX	74023527	74023598	mmu-mir-5132	0	-
chrX	74023848	74023936	mmu-mir-718	0	-
chrX	74274026	74274105	mmu-mir-7091	0	-
chrX	74317361	74317429	mmu-mir-7092	0	+
chrX	88759473	88759553	mmu-mir-1906-2	0	-
chrX	94274573	94274637	mmu-mir-7673	0	+
chrX	96242816	96242926	mmu-mir-223	0	+
chrX	100381096	100381185	mmu-mir-676	0	+
chrX	103572920	103572996	mmu-mir-421	0	-
chrX	103573059	103573154	mmu-mir-374b	0	-
chrX	103573084	103573133	mmu-mir-374c	0	+
chrX	104116174	104116274	mmu-mir-672	0	-
chrX	105344281	105344369	mmu-mir-384	0	-
chrX	105379081	105379179	mmu-mir-325	0	-
chrX	106309825	106309935	mmu-mir-6382	0	+
chrX	113074823	113074893	mmu-mir-361	0	-
chrX	134075315	134075397	mmu-mir-3112	0	+
chrX	134757630	134757731	mmu-mir-7093	0	+
chrX	135746715	135746769	mmu-mir-7646	0	+
chrX	135786113	135786217	mmu-mir-1970	0	-
chrX	136183244	136183360	mmu-mir-6383	0	+
chrX	140310947	140311012	mmu-mir-3475	0	+
chrX	142738999	142739097	mmu-mir-652	0	+
chrX	144297789	144297899	mmu-mir-680-2	0	+
chrX	145039343	145039414	mmu-mir-3472	0	+
chrX	146999404	146999509	mmu-mir-3552	0	+
chrX	147002258	147002366	mmu-mir-764	0	+
chrX	147009440	147009527	mmu-mir-1912	0	+
chrX	147010600	147010686	mmu-mir-1264	0	+
chrX	147064904	147065002	mmu-mir-1298	0	+
chrX	147158209	147158321	mmu-mir-448	0	+
chrX	150547384	150547445	mmu-mir-3620	0	-
chrX	151859561	151859637	mmu-mir-3113	0	+
chrX	151912352	151912423	mmu-let-7f-2	0	+
chrX	151913213	151913321	mmu-mir-98	0	+
chrX	162874917	162874995	mmu-mir-3473a	0	-

## Sheet: TableS1B_Opossum_miRNA_loci
# Genomic coordinates of all known (miRBase) and novel miRNA precursors analysed in this study
# Genome release: monDom5
# All novel precursors have been submitted to miRBase
chr1	131622	131668	mdo-novel-1	0	+
chr1	3445802	3445856	mdo-mir-7256	0	+
chr1	11130354	11130409	mdo-mir-7247	0	+
chr1	40434742	40434804	mdo-novel-2	0	-
chr1	41225366	41225425	mdo-mir-7257	0	+
chr1	48274734	48274798	mdo-mir-7277	0	-
chr1	63576961	63577021	mdo-novel-3	0	+
chr1	67940683	67940727	mdo-mir-7255	0	+
chr1	72640993	72641094	mdo-mir-340	0	+
chr1	81981105	81981189	mdo-mir-107	0	+
chr1	109630335	109630403	mdo-mir-146b	0	-
chr1	109663247	109663309	mdo-mir-7346	0	+
chr1	118003104	118003165	mdo-mir-7292	0	-
chr1	120539100	120539184	mdo-mir-184	0	-
chr1	122600867	122600931	mdo-mir-7296	0	-
chr1	122711569	122711659	mdo-mir-9a-1	0	-
chr1	122711586	122711644	mdo-novel-4	0	+
chr1	142496645	142496742	mdo-mir-204	0	-
chr1	147980880	147980965	mdo-mir-190a	0	+
chr1	155944996	155945054	mdo-mir-7248	0	+
chr1	156805234	156805294	mdo-novel-5	0	+
chr1	167505379	167505438	mdo-novel-6	0	-
chr1	169808419	169808478	mdo-novel-7	0	-
chr1	170282569	170282628	mdo-novel-8	0	+
chr1	172794233	172794310	mdo-mir-208a	0	-
chr1	172843321	172843378	mdo-mir-208b	0	-
chr1	173882513	173882572	mdo-novel-9	0	+
chr1	197442972	197443055	mdo-mir-7311	0	-
chr1	203612029	203612111	mdo-mir-147b	0	+
chr1	241059257	241059320	mdo-novel-10	0	+
chr1	266108105	266108166	mdo-novel-11	0	-
chr1	273898551	273898610	mdo-novel-12	0	-
chr1	311187370	311187451	mdo-mir-203	0	-
chr1	318718770	318718830	mdo-mir-7250	0	+
chr1	330615488	330615562	mdo-mir-1543	0	+
chr1	356034883	356034974	mdo-mir-146a	0	+
chr1	366217901	366217964	mdo-mir-7251	0	+
chr1	366803974	366804037	mdo-novel-13	0	+
chr1	366806261	366806318	mdo-novel-14	0	+
chr1	367063024	367063100	mdo-mir-103-1	0	-
chr1	367287192	367287256	mdo-mir-218-2	0	-
chr1	377173844	377173914	mdo-mir-145	0	-
chr1	377176750	377176813	mdo-mir-143	0	-
chr1	387013520	387013575	mdo-mir-7252	0	+
chr1	388091964	388092023	mdo-novel-15	0	+
chr1	388424205	388424284	mdo-mir-499	0	+
chr1	391799411	391799472	mdo-mir-7253	0	+
chr1	398141670	398141731	mdo-mir-7254	0	+
chr1	419148105	419148167	mdo-mir-181a-2	0	+
chr1	419149424	419149484	mdo-mir-181b-2	0	+
chr1	420501858	420501917	mdo-mir-7349	0	-
chr1	432007065	432007119	mdo-novel-16	0	-
chr1	432014376	432014430	mdo-novel-17	0	-
chr1	432129484	432129549	mdo-novel-18	0	-
chr1	432130345	432130406	mdo-mir-7356	0	-
chr1	432130348	432130408	mdo-novel-19	0	+
chr1	439137214	439137271	mdo-novel-20	0	+
chr1	447811940	447812023	mdo-mir-138	0	+
chr1	449545255	449545317	mdo-mir-7361	0	-
chr1	451465628	451465715	mdo-mir-455	0	-
chr1	452950973	452951036	mdo-mir-7366	0	-
chr1	452988893	452988956	mdo-novel-21	0	-
chr1	452989421	452989484	mdo-novel-22	0	-
chr1	453718397	453718457	mdo-mir-7372	0	-
chr1	453998858	453998947	mdo-mir-199b-1	0	-
chr1	454138609	454138700	mdo-mir-219-1	0	-
chr1	464344550	464344622	mdo-mir-151	0	+
chr1	464882830	464882899	mdo-mir-126	0	-
chr1	465628490	465628548	mdo-novel-23	0	-
chr1	468988542	468988605	mdo-novel-24	0	+
chr1	472807064	472807124	mdo-novel-25	0	-
chr1	472807065	472807127	mdo-novel-26	0	+
chr1	473547945	473548004	mdo-novel-27	0	+
chr1	474834579	474834647	mdo-mir-124a-3	0	-
chr1	476650620	476650680	mdo-mir-133a-2	0	-
chr1	476676454	476676515	mdo-mir-1-2	0	-
chr1	484720549	484720603	mdo-novel-28	0	-
chr1	508387923	508387986	mdo-novel-29	0	-
chr1	508775880	508775943	mdo-novel-30	0	+
chr1	527897918	527897979	mdo-novel-31	0	-
chr1	553093579	553093636	mdo-mir-7244	0	-
chr1	554605518	554605580	mdo-novel-32	0	+
chr1	577087573	577087631	mdo-mir-7245	0	-
chr1	580149256	580149333	mdo-mir-1540a	0	-
chr1	580149266	580149325	mdo-mir-1540b	0	+
chr1	587845368	587845435	mdo-mir-7258	0	+
chr1	587846263	587846348	mdo-mir-124a-1	0	+
chr1	604807200	604807258	mdo-mir-7259	0	+
chr1	628336541	628336602	mdo-mir-7260	0	+
chr1	630558408	630558468	mdo-novel-33	0	-
chr1	630558410	630558470	mdo-novel-34	0	+
chr1	630563487	630563545	mdo-novel-35	0	+
chr1	638493847	638493944	mdo-mir-216	0	+
chr1	638507639	638507721	mdo-mir-217	0	+
chr1	646033022	646033085	mdo-mir-7283	0	+
chr1	652176084	652176148	mdo-novel-36	0	-
chr1	699814287	699814343	mdo-mir-7249	0	+
chr1	699870956	699871026	mdo-mir-140	0	+
chr1	702937968	702938025	mdo-novel-37	0	-
chr1	704776838	704776899	mdo-mir-7246	0	-
chr1	708461214	708461269	mdo-novel-38	0	-
chr1	727148311	727148395	mdo-mir-103-2	0	-
chr1	727221038	727221103	mdo-novel-39	0	-
chr1	735911454	735911510	mdo-novel-40	0	-
chr2	2324781	2324845	mdo-novel-41	0	-
chr2	3426183	3426252	mdo-mir-761	0	+
chr2	9613528	9613581	mdo-mir-7271	0	+
chr2	11542126	11542193	mdo-novel-42	0	-
chr2	19197024	19197085	mdo-mir-7273	0	+
chr2	20448566	20448634	mdo-mir-186	0	+
chr2	21758872	21758934	mdo-mir-7284	0	-
chr2	21758874	21758936	mdo-novel-43	0	+
chr2	26267861	26267944	mdo-mir-101-1	0	+
chr2	37484367	37484427	mdo-mir-7281	0	+
chr2	44490335	44490393	mdo-mir-7262b	0	-
chr2	64368077	64368187	mdo-mir-214	0	-
chr2	64374174	64374233	mdo-mir-199b-2	0	-
chr2	66320914	66320985	mdo-novel-44	0	-
chr2	66673619	66673681	mdo-novel-45	0	+
chr2	76169638	76169698	mdo-mir-7263	0	+
chr2	99872866	99872953	mdo-mir-181b-1	0	-
chr2	99873078	99873142	mdo-mir-181a-1	0	-
chr2	103683708	103683769	mdo-mir-7261	0	-
chr2	109895968	109896039	mdo-novel-46	0	-
chr2	110937528	110937591	mdo-novel-47	0	-
chr2	111348470	111348570	mdo-mir-135b	0	-
chr2	114183792	114183848	mdo-mir-29a-2	0	-
chr2	114184521	114184585	mdo-mir-29b-2	0	-
chr2	116544494	116544566	mdo-mir-205a	0	+
chr2	116544496	116544554	mdo-novel-48	0	-
chr2	130471224	130471327	mdo-mir-215	0	-
chr2	142994546	142994599	mdo-mir-7262a	0	-
chr2	172169919	172169993	mdo-mir-21	0	-
chr2	172985793	172985856	mdo-mir-130c-1	0	+
chr2	172986773	172986858	mdo-mir-301	0	+
chr2	173163236	173163297	mdo-mir-7272	0	+
chr2	174133934	174134008	mdo-mir-142	0	+
chr2	188533052	188533128	mdo-mir-190b	0	-
chr2	189628300	189628355	mdo-novel-49	0	+
chr2	189889681	189889743	mdo-mir-92b	0	+
chr2	191328852	191328914	mdo-mir-9a-3	0	-
chr2	191328856	191328914	mdo-novel-50	0	+
chr2	194202398	194202458	mdo-novel-51	0	+
chr2	194425218	194425303	mdo-novel-52	0	-
chr2	199146017	199146080	mdo-novel-53	0	-
chr2	200362980	200363053	mdo-mir-152	0	-
chr2	201156731	201156821	mdo-mir-10a	0	-
chr2	201215984	201216044	mdo-mir-196a	0	-
chr2	211815233	211815302	mdo-novel-54	0	-
chr2	214563884	214563945	mdo-mir-7274	0	+
chr2	233748730	233748789	mdo-mir-7275	0	+
chr2	233883738	233883827	mdo-mir-338	0	+
chr2	253492943	253493024	mdo-mir-7276	0	+
chr2	254142492	254142553	mdo-novel-55	0	-
chr2	255707662	255707746	mdo-mir-497	0	+
chr2	255708031	255708103	mdo-mir-195	0	+
chr2	257689982	257690071	mdo-mir-93	0	+
chr2	257690279	257690362	mdo-mir-25	0	+
chr2	258214661	258214722	mdo-novel-56	0	-
chr2	266544098	266544153	mdo-novel-57	0	-
chr2	266773412	266773474	mdo-mir-7278	0	+
chr2	266832840	266832915	mdo-novel-58	0	+
chr2	267617181	267617245	mdo-mir-7264	0	-
chr2	268510734	268510798	mdo-novel-59	0	-
chr2	270337829	270337893	mdo-novel-60	0	-
chr2	270698644	270698704	mdo-mir-219-2	0	+
chr2	274924412	274924466	mdo-mir-7265	0	-
chr2	278258770	278258829	mdo-mir-7279	0	+
chr2	279202649	279202700	mdo-mir-7266	0	-
chr2	281225213	281225274	mdo-novel-61	0	-
chr2	285084928	285084995	mdo-novel-62	0	-
chr2	300498998	300499074	mdo-mir-206	0	+
chr2	300507721	300507779	mdo-novel-63	0	+
chr2	306241181	306241232	mdo-novel-64	0	+
chr2	307627201	307627265	mdo-novel-65	0	+
chr2	322643033	322643094	mdo-mir-30c-1	0	-
chr2	322692511	322692583	mdo-mir-30a	0	-
chr2	339814389	339814450	mdo-mir-7280	0	+
chr2	350619853	350619915	mdo-novel-66	0	-
chr2	381750183	381750251	mdo-novel-67	0	-
chr2	431800199	431800260	mdo-novel-68	0	+
chr2	461276628	461276690	mdo-novel-69	0	+
chr2	463982401	463982457	mdo-mir-137a	0	-
chr2	487885134	487885185	mdo-mir-7282	0	+
chr2	504311645	504311711	mdo-mir-193a	0	-
chr2	504323797	504323852	mdo-novel-71	0	-
chr2	504461003	504461066	mdo-mir-7267	0	-
chr2	506777374	506777436	mdo-mir-451	0	-
chr2	506777489	506777574	mdo-mir-144	0	-
chr2	508353809	508353911	mdo-novel-72	0	-
chr2	510678405	510678490	mdo-mir-28	0	-
chr2	517205524	517205605	mdo-mir-22	0	-
chr2	517205534	517205596	mdo-novel-73	0	+
chr2	517205668	517205727	mdo-mir-7268	0	-
chr2	517586548	517586614	mdo-mir-132	0	-
chr2	517587362	517587453	mdo-mir-212	0	-
chr2	522642137	522642208	mdo-novel-74	0	-
chr2	541547257	541547317	mdo-mir-1548	0	-
chr2	541547456	541547520	mdo-mir-7269	0	-
chr2	541551022	541551080	mdo-mir-7270	0	-
chr3	17544591	17544650	mdo-mir-449c	0	-
chr3	17545605	17545684	mdo-mir-449a	0	-
chr3	17545754	17545816	mdo-mir-449b	0	-
chr3	17940148	17940205	mdo-mir-7298	0	-
chr3	18146514	18146576	mdo-novel-75	0	-
chr3	19324682	19324742	mdo-novel-76	0	-
chr3	19324684	19324744	mdo-novel-77	0	+
chr3	75989941	75990000	mdo-novel-78	0	-
chr3	87606199	87606280	mdo-mir-187	0	+
chr3	107991824	107991883	mdo-novel-79	0	-
chr3	128596672	128596735	mdo-novel-80	0	+
chr3	141777651	141777708	mdo-novel-81	0	-
chr3	173742223	173742316	mdo-mir-124a-2	0	-
chr3	199923561	199923618	mdo-novel-82	0	-
chr3	215711845	215711932	mdo-mir-9a-2	0	+
chr3	215711860	215711916	mdo-novel-83	0	-
chr3	234083787	234083847	mdo-novel-84	0	+
chr3	243050759	243050819	mdo-novel-85	0	-
chr3	247368063	247368137	mdo-mir-122	0	-
chr3	247368073	247368131	mdo-novel-86	0	+
chr3	263364373	263364459	mdo-mir-1-1	0	+
chr3	263368064	263368151	mdo-mir-133a-1	0	+
chr3	277140122	277140184	mdo-novel-87	0	+
chr3	362140419	362140476	mdo-mir-7293	0	+
chr3	364601259	364601342	mdo-mir-599	0	-
chr3	364601416	364601491	mdo-mir-875	0	-
chr3	387473285	387473345	mdo-mir-7285	0	-
chr3	410851524	410851583	mdo-mir-7286	0	-
chr3	414604733	414604793	mdo-mir-30b	0	-
chr3	414610854	414610917	mdo-novel-88	0	-
chr3	421520910	421520977	mdo-novel-89	0	+
chr3	429211872	429211959	mdo-novel-90	0	+
chr3	429645669	429645728	mdo-mir-137b	0	-
chr3	430288133	430288194	mdo-mir-199b-3	0	+
chr3	446336413	446336475	mdo-novel-91	0	+
chr3	446461128	446461192	mdo-mir-181b-3	0	-
chr3	446461501	446461573	mdo-mir-181a-3	0	-
chr3	446525825	446525898	mdo-mir-23a	0	+
chr3	446525994	446526080	mdo-mir-27a	0	+
chr3	446526143	446526216	mdo-mir-24-2	0	+
chr3	447750033	447750093	mdo-mir-7294	0	+
chr3	452322540	452322598	mdo-novel-92	0	+
chr3	452650306	452650365	mdo-mir-9b	0	-
chr3	457792409	457792476	mdo-mir-7287	0	-
chr3	465007919	465007979	mdo-mir-7288	0	-
chr3	481242205	481242258	mdo-mir-7295	0	+
chr3	484373841	484373900	mdo-mir-7289	0	-
chr3	488132645	488132710	mdo-novel-93	0	-
chr3	498005957	498006018	mdo-mir-7297	0	+
chr3	499814745	499814807	mdo-novel-94	0	-
chr3	503327577	503327636	mdo-novel-95	0	+
chr3	506150236	506150294	mdo-mir-7290	0	-
chr3	510012157	510012218	mdo-novel-96	0	-
chr3	511101360	511101418	mdo-mir-130b	0	-
chr3	511102162	511102221	mdo-mir-130c-2	0	-
chr3	514100645	514100701	mdo-mir-7291	0	-
chr3	514438607	514438673	mdo-novel-97	0	-
chr3	518067371	518067460	mdo-mir-1546	0	-
chr3	518067387	518067447	mdo-novel-98	0	+
chr4	1003540	1003622	mdo-mir-125b-1	0	+
chr4	17426715	17426783	mdo-mir-222a	0	+
chr4	17427279	17427353	mdo-mir-221	0	+
chr4	17899130	17899186	mdo-mir-7312	0	-
chr4	17899132	17899188	mdo-novel-99	0	+
chr4	18052694	18052757	mdo-novel-100	0	-
chr4	27847913	27847976	mdo-novel-101	0	+
chr4	61378041	61378133	mdo-novel-102	0	-
chr4	80422357	80422416	mdo-mir-7313	0	-
chr4	132653245	132653301	mdo-mir-128b	0	+
chr4	183165422	183165509	mdo-mir-885	0	+
chr4	183165621	183165682	mdo-novel-103	0	-
chr4	183248458	183248522	mdo-mir-7307	0	+
chr4	187496023	187496134	mdo-mir-10b	0	+
chr4	190697490	190697546	mdo-novel-104	0	-
chr4	190755005	190755072	mdo-mir-7314	0	-
chr4	222401198	222401256	mdo-novel-105	0	+
chr4	226180100	226180180	mdo-mir-100	0	+
chr4	226185496	226185563	mdo-let-7a-2	0	+
chr4	226228924	226228981	mdo-novel-106	0	+
chr4	226229990	226230053	mdo-mir-125b-2	0	+
chr4	227007540	227007603	mdo-novel-107	0	-
chr4	241558813	241558868	mdo-novel-108	0	-
chr4	241888508	241888566	mdo-mir-34c	0	-
chr4	241889197	241889256	mdo-mir-34b	0	-
chr4	241889197	241889260	mdo-novel-109	0	+
chr4	248808418	248808474	mdo-novel-110	0	-
chr4	254998466	254998523	mdo-novel-111	0	+
chr4	272772527	272772587	mdo-mir-7299	0	-
chr4	318199415	318199498	mdo-mir-15a	0	+
chr4	318199559	318199649	mdo-mir-16-1	0	+
chr4	318254538	318254597	mdo-novel-112	0	+
chr4	326415431	326415491	mdo-novel-113	0	+
chr4	327821748	327821816	mdo-novel-114	0	+
chr4	328235627	328235688	mdo-mir-7308	0	+
chr4	333448304	333448365	mdo-novel-115	0	+
chr4	335163694	335163785	mdo-mir-1547	0	-
chr4	347282325	347282394	mdo-mir-139	0	+
chr4	362166096	362166154	mdo-mir-7300	0	-
chr4	362266312	362266375	mdo-novel-116	0	+
chr4	362633938	362633998	mdo-mir-7309	0	+
chr4	367747845	367747914	mdo-novel-117	0	-
chr4	368329506	368329565	mdo-mir-7310	0	+
chr4	380255119	380255178	mdo-novel-118	0	-
chr4	382856418	382856474	mdo-novel-119	0	-
chr4	383075255	383075316	mdo-novel-120	0	+
chr4	384562204	384562265	mdo-mir-7301	0	-
chr4	387153161	387153223	mdo-novel-121	0	-
chr4	389166959	389167027	mdo-mir-200b	0	+
chr4	389169610	389169696	mdo-mir-200a	0	+
chr4	389175424	389175496	mdo-mir-429	0	+
chr4	395872533	395872596	mdo-novel-122	0	+
chr4	400890412	400890471	mdo-mir-1643a	0	-
chr4	400890545	400890607	mdo-mir-7302	0	-
chr4	400890700	400890759	mdo-mir-1643b	0	-
chr4	400890971	400891034	mdo-mir-7303	0	-
chr4	400891413	400891481	mdo-mir-1541	0	-
chr4	400891595	400891650	mdo-mir-7304	0	-
chr4	400892026	400892085	mdo-mir-7305	0	-
chr4	412909438	412909511	mdo-novel-123	0	-
chr4	412917177	412917250	mdo-mir-7306	0	-
chr4	412972133	412972202	mdo-mir-150	0	+
chr4	424720166	424720230	mdo-mir-30d	0	+
chr4	424723798	424723859	mdo-mir-30c-2	0	+
chr4	433575256	433575367	mdo-mir-34a	0	+
chr5	17233175	17233232	mdo-mir-7316	0	+
chr5	17427573	17427643	mdo-mir-383	0	+
chr5	18615367	18615426	mdo-mir-7318	0	+
chr5	22722004	22722066	mdo-novel-124	0	-
chr5	62916746	62916808	mdo-novel-125	0	-
chr5	66074336	66074399	mdo-mir-367	0	-
chr5	66074485	66074556	mdo-mir-302d	0	-
chr5	66074648	66074718	mdo-mir-302a	0	-
chr5	66074863	66074922	mdo-mir-302c	0	-
chr5	66075007	66075078	mdo-mir-302b	0	-
chr5	76923144	76923203	mdo-mir-7321	0	-
chr5	107450086	107450144	mdo-mir-7322	0	-
chr5	107782703	107782757	mdo-novel-126	0	-
chr5	110351156	110351219	mdo-mir-7323	0	-
chr5	110351158	110351220	mdo-novel-127	0	+
chr5	114661557	114661642	mdo-novel-128	0	-
chr5	116191564	116191629	mdo-novel-129	0	+
chr5	118484761	118484818	mdo-novel-130	0	-
chr5	118791956	118792016	mdo-mir-7324	0	-
chr5	122245441	122245500	mdo-novel-131	0	+
chr5	139836230	139836291	mdo-mir-7315	0	+
chr5	173092650	173092705	mdo-novel-132	0	-
chr5	173201691	173201754	mdo-novel-133	0	-
chr5	206282105	206282164	mdo-novel-134	0	+
chr5	208287226	208287335	mdo-mir-218-1	0	-
chr5	223280789	223280847	mdo-novel-135	0	-
chr5	223399568	223399627	mdo-novel-136	0	+
chr5	223677436	223677494	mdo-mir-7325	0	-
chr5	224613793	224613854	mdo-mir-7317	0	+
chr5	232223936	232223998	mdo-novel-137	0	+
chr5	232970833	232970893	mdo-novel-138	0	-
chr5	236005391	236005450	mdo-novel-139	0	-
chr5	236047848	236047929	mdo-novel-140	0	+
chr5	248281604	248281666	mdo-novel-142	0	-
chr5	250609827	250609886	mdo-novel-143	0	+
chr5	268329077	268329139	mdo-mir-7319	0	+
chr5	282623678	282623739	mdo-novel-144	0	-
chr5	282623682	282623739	mdo-mir-7320	0	+
chr5	283764633	283764698	mdo-novel-145	0	+
chr5	291845600	291845676	mdo-mir-130a	0	+
chr5	295246728	295246809	mdo-novel-146	0	+
chr5	301771093	301771146	mdo-novel-147	0	+
chr5	302748700	302748758	mdo-novel-148	0	-
chr6	2467055	2467119	mdo-novel-149	0	+
chr6	17695900	17695974	mdo-mir-23b	0	+
chr6	17696089	17696186	mdo-mir-27b	0	+
chr6	17696507	17696564	mdo-mir-24-1	0	+
chr6	28781962	28782023	mdo-novel-150	0	+
chr6	32562782	32562842	mdo-mir-505	0	-
chr6	35734627	35734714	mdo-mir-31	0	-
chr6	46253222	46253281	mdo-mir-873	0	-
chr6	53019166	53019230	mdo-novel-151	0	-
chr6	81519581	81519641	mdo-mir-7330	0	-
chr6	85995679	85995744	mdo-novel-152	0	+
chr6	85995832	85995896	mdo-novel-153	0	+
chr6	86703148	86703216	mdo-mir-7331-1	0	-
chr6	86716343	86716411	mdo-mir-7331-2	0	-
chr6	108685052	108685111	mdo-mir-193b	0	+
chr6	108690912	108690999	mdo-mir-365	0	+
chr6	127713719	127713796	mdo-mir-7	0	+
chr6	135714002	135714071	mdo-mir-32	0	+
chr6	150130920	150130980	mdo-novel-154	0	+
chr6	157176037	157176097	mdo-novel-155	0	+
chr6	157286781	157286844	mdo-novel-156	0	-
chr6	158941636	158941698	mdo-novel-157	0	+
chr6	166669165	166669244	mdo-mir-101-2	0	+
chr6	197334846	197334931	mdo-mir-460	0	-
chr6	201968079	201968138	mdo-mir-2970	0	-
chr6	201968550	201968635	mdo-mir-425	0	-
chr6	201970816	201970890	mdo-mir-191	0	-
chr6	214307232	214307289	mdo-novel-158	0	-
chr6	214337423	214337486	mdo-mir-7332	0	-
chr6	214449771	214449829	mdo-novel-159	0	-
chr6	214453341	214453397	mdo-mir-7333	0	-
chr6	223394490	223394548	mdo-mir-7326	0	+
chr6	243825028	243825089	mdo-mir-7327	0	+
chr6	256407622	256407728	mdo-let-7d	0	-
chr6	256412446	256412524	mdo-let-7f-1	0	-
chr6	256413192	256413270	mdo-let-7a-1	0	-
chr6	257291025	257291092	mdo-mir-7334	0	-
chr6	277022694	277022773	mdo-let-7g	0	+
chr6	280355987	280356052	mdo-mir-7328	0	+
chr6	282777999	282778064	mdo-mir-7329	0	+
chr6	290241097	290241181	mdo-mir-128a	0	-
chr7	4191764	4191824	mdo-novel-160	0	-
chr7	17602314	17602369	mdo-novel-161	0	+
chr7	55378377	55378438	mdo-mir-1805	0	-
chr7	78195704	78195765	mdo-mir-7341	0	-
chr7	86952748	86952835	mdo-mir-7335	0	+
chr7	86952926	86952986	mdo-mir-7336	0	+
chr7	87022415	87022472	mdo-mir-7337	0	+
chr7	94990354	94990420	mdo-mir-7338	0	+
chr7	101031122	101031191	mdo-novel-162	0	-
chr7	102931919	102931978	mdo-novel-163	0	-
chr7	105264555	105264614	mdo-mir-7342	0	-
chr7	108468190	108468268	mdo-mir-92a-1	0	-
chr7	108468304	108468393	mdo-mir-19b-1	0	-
chr7	108468429	108468531	mdo-mir-20a	0	-
chr7	108468608	108468689	mdo-mir-19a	0	-
chr7	108468759	108468831	mdo-mir-18a	0	-
chr7	108468893	108468978	mdo-mir-17	0	-
chr7	123247880	123247947	mdo-mir-7343	0	-
chr7	123249085	123249144	mdo-novel-164	0	-
chr7	164429078	164429176	mdo-mir-759	0	-
chr7	173335343	173335433	mdo-mir-153-1	0	+
chr7	173725889	173725952	mdo-mir-375	0	+
chr7	174077643	174077718	mdo-novel-165	0	+
chr7	174297321	174297389	mdo-mir-26-2	0	-
chr7	174477519	174477587	mdo-novel-166	0	+
chr7	184855501	184855568	mdo-mir-7339	0	+
chr7	195304431	195304493	mdo-mir-7340	0	+
chr7	234027688	234027759	mdo-mir-551b	0	-
chr7	234027694	234027757	mdo-novel-167	0	+
chr7	242919052	242919117	mdo-mir-16-2	0	-
chr7	249561237	249561298	mdo-mir-7344	0	-
chr7	260008653	260008712	mdo-novel-168	0	-
chr8	11048199	11048287	mdo-let-7b	0	-
chr8	11049696	11049771	mdo-let-7a-3	0	-
chr8	11943899	11943953	mdo-novel-169	0	-
chr8	22252150	22252228	mdo-let-7i	0	+
chr8	35814647	35814705	mdo-mir-7345-1	0	+
chr8	45859679	45859738	mdo-novel-170	0	+
chr8	46929986	46930048	mdo-novel-171	0	+
chr8	70552077	70552137	mdo-novel-172	0	+
chr8	74781631	74781690	mdo-mir-1251	0	+
chr8	74872639	74872739	mdo-mir-135a	0	+
chr8	76097912	76097994	mdo-novel-173	0	+
chr8	80147012	80147070	mdo-mir-7345-2	0	+
chr8	87784785	87784857	mdo-mir-1542-1	0	-
chr8	87784981	87785061	mdo-mir-1542-2	0	-
chr8	108475448	108475516	mdo-mir-200c	0	+
chr8	108475858	108475922	mdo-mir-141	0	+
chr8	147901863	147901922	mdo-novel-174	0	-
chr8	181585324	181585381	mdo-mir-7350	0	-
chr8	188064157	188064231	mdo-mir-129	0	+
chr8	189660600	189660671	mdo-mir-182	0	-
chr8	189667846	189667943	mdo-mir-96	0	-
chr8	189668264	189668352	mdo-mir-183	0	-
chr8	190600408	190600472	mdo-mir-29a-1	0	-
chr8	190600819	190600905	mdo-mir-29b-1	0	-
chr8	192727716	192727772	mdo-mir-7351	0	-
chr8	216589539	216589601	mdo-novel-175	0	-
chr8	224465354	224465414	mdo-mir-7352	0	-
chr8	224496549	224496636	mdo-mir-153-2	0	-
chr8	252319621	252319679	mdo-novel-176	0	+
chr8	262684271	262684336	mdo-mir-7347	0	+
chr8	270294367	270294428	mdo-novel-177	0	-
chr8	272052234	272052289	mdo-mir-7353	0	-
chr8	289667965	289668022	mdo-novel-178	0	+
chr8	290224916	290224976	mdo-mir-7348	0	+
chr8	297346794	297346880	mdo-mir-196b	0	+
chr8	298347763	298347831	mdo-mir-148	0	+
chr8	300336662	300336726	mdo-novel-179	0	+
chr8	300337398	300337459	mdo-novel-180	0	+
chr8	300357904	300357963	mdo-novel-181	0	+
chr8	300380324	300380389	mdo-novel-182	0	+
chr8	310418220	310418283	mdo-mir-7354	0	-
chrUn	486142	486201	mdo-mir-7357_M1	0	-
chrUn	12356260	12356318	mdo-novel-183	0	+
chrUn	23520872	23520944	mdo-let-7f-2_M1	0	-
chrUn	26014226	26014309	mdo-mir-551a_M1	0	-
chrUn	28299327	28299395	mdo-mir-33_M1	0	+
chrUn	32096946	32097015	mdo-mir-26-1_M1	0	-
chrUn	38480439	38480500	mdo-novel-184	0	+
chrUn	46052360	46052418	mdo-mir-7358_M1	0	-
chrUn	46252492	46252574	mdo-mir-210_M1	0	+
chrUn	46252503	46252561	mdo-novel-185	0	-
chrUn	48296697	48296767	mdo-mir-26-3_M1	0	-
chrUn	50631312	50631365	mdo-novel-186	0	+
chrUn	54201154	54201217	mdo-mir-7355_M1	0	+
chrUn	60423747	60423810	mdo-mir-1549_M1	0	+
chrUn	60423748	60423806	mdo-novel-187	0	-
chrUn	60742655	60742712	mdo-novel-188	0	+
chrUn	61882828	61882887	mdo-novel-189	0	+
chrUn	67217351	67217414	mdo-novel-190	0	+
chrUn	75565280	75565336	mdo-mir-7359a-3_M2	0	-
chrUn	75565280	75565336	mdo-mir-7359a-1_M2	0	-
chrUn	75565280	75565336	mdo-mir-7359a-4_M1	0	-
chrUn	75565280	75565336	mdo-mir-7359a-5_M2	0	-
chrUn	75565280	75565336	mdo-mir-7359a-2_M1	0	-
chrUn	75566442	75566501	mdo-mir-7360-5_M2	0	-
chrUn	75566442	75566501	mdo-mir-7360-2_M2	0	-
chrUn	75566442	75566501	mdo-mir-7360-1_M1	0	-
chrUn	75566442	75566501	mdo-mir-7360-7_M1	0	-
chrUn	75566442	75566501	mdo-mir-7360-8_M3	0	-
chrUn	75566442	75566501	mdo-mir-7360-3_M1	0	-
chrUn	75566442	75566501	mdo-mir-7360-4_M1	0	-
chrUn	75566442	75566501	mdo-mir-7360-6_M1	0	-
chrUn	75569345	75569401	mdo-mir-7359b-2_M1	0	-
chrUn	75569345	75569401	mdo-mir-7359b-3_M1	0	-
chrUn	75569345	75569401	mdo-mir-7359b-1_M1	0	-
chrUn	75569345	75569401	mdo-mir-7359b-4_M1	0	-
chrUn	75570506	75570565	mdo-mir-7360-5_M3	0	-
chrUn	75570506	75570565	mdo-mir-7360-2_M3	0	-
chrUn	75570506	75570565	mdo-mir-7360-1_M2	0	-
chrUn	75570506	75570565	mdo-mir-7360-7_M2	0	-
chrUn	75570506	75570565	mdo-mir-7360-8_M1	0	-
chrUn	75570506	75570565	mdo-mir-7360-3_M2	0	-
chrUn	75570506	75570565	mdo-mir-7360-4_M2	0	-
chrUn	75570506	75570565	mdo-mir-7360-6_M2	0	-
chrUn	75572042	75572098	mdo-mir-7359a-3_M1	0	-
chrUn	75572042	75572098	mdo-mir-7359a-1_M1	0	-
chrUn	75572042	75572098	mdo-mir-7359a-4_M2	0	-
chrUn	75572042	75572098	mdo-mir-7359a-5_M1	0	-
chrUn	75572042	75572098	mdo-mir-7359a-2_M2	0	-
chrUn	75573204	75573263	mdo-mir-7360-5_M1	0	-
chrUn	75573204	75573263	mdo-mir-7360-2_M1	0	-
chrUn	75573204	75573263	mdo-mir-7360-1_M3	0	-
chrUn	75573204	75573263	mdo-mir-7360-7_M3	0	-
chrUn	75573204	75573263	mdo-mir-7360-8_M2	0	-
chrUn	75573204	75573263	mdo-mir-7360-3_M3	0	-
chrUn	75573204	75573263	mdo-mir-7360-4_M3	0	-
chrUn	75573204	75573263	mdo-mir-7360-6_M3	0	-
chrUn	89028892	89028984	mdo-novel-192	0	-
chrX	3218256	3218325	mdo-mir-7364	0	+
chrX	3931016	3931076	mdo-novel-193	0	+
chrX	4607961	4608023	mdo-mir-7385a	0	+
chrX	4609053	4609115	mdo-novel-194	0	+
chrX	4610587	4610649	mdo-mir-7385b	0	+
chrX	4611474	4611536	mdo-mir-7385c	0	+
chrX	4611933	4611995	mdo-mir-7385d	0	+
chrX	4612214	4612274	mdo-novel-195	0	+
chrX	4614574	4614633	mdo-mir-7385e	0	+
chrX	4614847	4614911	mdo-novel-196	0	+
chrX	4615420	4615479	mdo-novel-197	0	+
chrX	4616509	4616572	mdo-mir-7385f	0	+
chrX	4616787	4616846	mdo-novel-198	0	+
chrX	4617776	4617836	mdo-novel-199	0	+
chrX	7282209	7282268	mdo-mir-7363	0	-
chrX	8095491	8095553	mdo-novel-200	0	-
chrX	10078237	10078348	mdo-mir-223	0	-
chrX	11424682	11424744	mdo-mir-7365	0	-
chrX	13921266	13921326	mdo-novel-201	0	-
chrX	13923739	13923798	mdo-mir-1544b	0	-
chrX	13926549	13926608	mdo-novel-202	0	-
chrX	13927963	13928023	mdo-novel-203	0	-
chrX	13930495	13930554	mdo-novel-204	0	-
chrX	13933822	13933883	mdo-mir-1544c-1	0	-
chrX	13935989	13936048	mdo-novel-205	0	-
chrX	13939063	13939122	mdo-mir-1544e-1	0	-
chrX	13941603	13941663	mdo-novel-206	0	-
chrX	13948205	13948263	mdo-novel-207	0	-
chrX	13950805	13950866	mdo-mir-1544c-2	0	-
chrX	13953360	13953419	mdo-novel-208	0	-
chrX	13958256	13958316	mdo-novel-209	0	-
chrX	13960782	13960843	mdo-mir-1544c-3	0	-
chrX	13966014	13966073	mdo-mir-1545b-1	0	-
chrX	13968429	13968490	mdo-mir-1544c-4	0	-
chrX	13970933	13970992	mdo-mir-1545b-2	0	-
chrX	13973353	13973412	mdo-mir-1544e-2	0	-
chrX	13975863	13975923	mdo-novel-210	0	-
chrX	13978267	13978328	mdo-mir-1544c-5	0	-
chrX	13983179	13983238	mdo-mir-1544e-3	0	-
chrX	13985681	13985740	mdo-mir-1545b-3	0	-
chrX	13994230	13994290	mdo-novel-211	0	-
chrX	13996259	13996318	mdo-novel-212	0	-
chrX	13998841	13998902	mdo-mir-1544c-6	0	-
chrX	14003846	14003918	mdo-mir-1545a	0	-
chrX	14005427	14005509	mdo-mir-1544a	0	-
chrX	14007942	14008000	mdo-mir-1545c	0	-
chrX	14010513	14010574	mdo-mir-1544d	0	-
chrX	14442860	14442930	mdo-mir-7367	0	-
chrX	15052711	15052769	mdo-mir-7377	0	+
chrX	18001895	18001954	mdo-novel-213	0	-
chrX	22138230	22138289	mdo-mir-7383-1	0	+
chrX	22176058	22176117	mdo-mir-7383-2	0	+
chrX	22218614	22218673	mdo-mir-7383-3	0	+
chrX	22286401	22286460	mdo-mir-7383-4	0	+
chrX	22358077	22358136	mdo-mir-7383-5	0	+
chrX	26897673	26897731	mdo-mir-7368	0	-
chrX	29144053	29144111	mdo-mir-7369	0	-
chrX	31175975	31176037	mdo-mir-7384	0	+
chrX	31811771	31811832	mdo-mir-7370	0	-
chrX	35202081	35202170	mdo-mir-363	0	-
chrX	35202230	35202295	mdo-mir-92a-2	0	-
chrX	35202388	35202447	mdo-mir-19b-2	0	-
chrX	35202542	35202603	mdo-mir-20b	0	-
chrX	35202854	35202919	mdo-mir-18b	0	-
chrX	35203045	35203114	mdo-mir-106	0	-
chrX	35340875	35340939	mdo-novel-214	0	+
chrX	35349266	35349330	mdo-novel-215	0	+
chrX	35734294	35734357	mdo-novel-216	0	-
chrX	35734461	35734517	mdo-mir-15c	0	-
chrX	38866829	38866888	mdo-mir-7370i	0	-
chrX	38895436	38895494	mdo-mir-7371a	0	-
chrX	38896648	38896703	mdo-mir-7371b-1	0	-
chrX	38897273	38897333	mdo-mir-7371c	0	-
chrX	38897921	38897979	mdo-mir-7371d	0	-
chrX	38898553	38898609	mdo-mir-7371e	0	-
chrX	38899298	38899356	mdo-mir-7371f	0	-
chrX	38901020	38901080	mdo-mir-7371g	0	-
chrX	38901553	38901611	mdo-mir-7371h	0	-
chrX	38902123	38902180	mdo-mir-7371b-2	0	-
chrX	38902980	38903043	mdo-mir-7371j	0	-
chrX	40471894	40471952	mdo-novel-217	0	+
chrX	40472058	40472119	mdo-mir-7386a-1	0	+
chrX	40472370	40472431	mdo-mir-7386a-2	0	+
chrX	40472533	40472593	mdo-mir-7386a-3	0	+
chrX	40472740	40472797	mdo-mir-7386b	0	+
chrX	40473855	40473914	mdo-mir-7387	0	+
chrX	40474429	40474488	mdo-novel-218	0	+
chrX	40476155	40476213	mdo-novel-219	0	+
chrX	40478032	40478091	mdo-mir-7386h	0	+
chrX	40478196	40478256	mdo-mir-7386c	0	+
chrX	40479472	40479531	mdo-novel-220	0	+
chrX	40481295	40481352	mdo-mir-7386i	0	+
chrX	40481838	40481897	mdo-novel-221	0	+
chrX	40482900	40482958	mdo-mir-7386j	0	+
chrX	40484388	40484445	mdo-mir-7386k	0	+
chrX	40485433	40485494	mdo-mir-7386d	0	+
chrX	40485587	40485646	mdo-mir-7386e	0	+
chrX	40486319	40486378	mdo-novel-222	0	+
chrX	40488022	40488080	mdo-novel-223	0	+
chrX	40488791	40488846	mdo-mir-7386l	0	+
chrX	40489391	40489450	mdo-novel-224	0	+
chrX	40491867	40491926	mdo-mir-7386f	0	+
chrX	40492021	40492080	mdo-mir-7386g	0	+
chrX	40497148	40497205	mdo-mir-7386m	0	+
chrX	40500910	40500970	mdo-mir-7386n	0	+
chrX	40502423	40502481	mdo-novel-225	0	+
chrX	40504971	40505028	mdo-mir-7386o	0	+
chrX	40506273	40506332	mdo-mir-7388a	0	+
chrX	40514662	40514725	mdo-mir-7389	0	+
chrX	40516162	40516222	mdo-mir-7388b	0	+
chrX	40516905	40516960	mdo-mir-7388c	0	+
chrX	40522764	40522822	mdo-mir-7390	0	+
chrX	41863233	41863292	mdo-mir-7391	0	+
chrX	44665890	44665948	mdo-mir-7373a-1	0	-
chrX	44666175	44666233	mdo-mir-7373a-2	0	-
chrX	44667556	44667611	mdo-novel-226	0	-
chrX	44668665	44668723	mdo-novel-227	0	-
chrX	44670460	44670515	mdo-mir-7374a	0	-
chrX	44674235	44674310	mdo-novel-228	0	-
chrX	44674535	44674592	mdo-novel-229	0	-
chrX	44674817	44674874	mdo-novel-230	0	-
chrX	44675101	44675159	mdo-novel-231	0	-
chrX	44675951	44676008	mdo-novel-232	0	-
chrX	44676537	44676594	mdo-mir-7375	0	-
chrX	44676821	44676879	mdo-novel-233	0	-
chrX	44679086	44679143	mdo-novel-234	0	-
chrX	44679657	44679714	mdo-novel-235	0	-
chrX	44681359	44681416	mdo-mir-7374c	0	-
chrX	44682075	44682130	mdo-mir-7374b	0	-
chrX	44686438	44686494	mdo-novel-236	0	-
chrX	44687807	44687862	mdo-mir-7373b	0	-
chrX	44688085	44688149	mdo-novel-237	0	-
chrX	44688607	44688663	mdo-mir-7373c	0	-
chrX	44689542	44689601	mdo-mir-7373d	0	-
chrX	45030868	45030922	mdo-novel-238	0	-
chrX	47647593	47647650	mdo-mir-7392-1	0	+
chrX	47653725	47653777	mdo-mir-7393	0	+
chrX	47656550	47656607	mdo-mir-7392-2	0	+
chrX	47660933	47660987	mdo-mir-7394a	0	+
chrX	47661481	47661537	mdo-mir-7395	0	+
chrX	47667187	47667240	mdo-novel-239	0	+
chrX	47667355	47667411	mdo-mir-7396	0	+
chrX	47672117	47672173	mdo-mir-7397	0	+
chrX	47675601	47675655	mdo-mir-7394b	0	+
chrX	57276305	57276364	mdo-mir-7398e	0	+
chrX	57279274	57279333	mdo-mir-7398f	0	+
chrX	57282763	57282822	mdo-mir-7398a-1	0	+
chrX	57283470	57283531	mdo-mir-7398r	0	+
chrX	57284127	57284188	mdo-mir-7398n	0	+
chrX	57284808	57284869	mdo-mir-7398k-1	0	+
chrX	57285472	57285533	mdo-mir-7398k-2	0	+
chrX	57286130	57286191	mdo-mir-7398o	0	+
chrX	57286819	57286880	mdo-mir-7398l	0	+
chrX	57287462	57287521	mdo-mir-7398m	0	+
chrX	57288056	57288117	mdo-mir-7398c	0	+
chrX	57288722	57288783	mdo-mir-7398b	0	+
chrX	57289401	57289462	mdo-novel-240	0	+
chrX	57291702	57291761	mdo-mir-7398a-2	0	+
chrX	57292643	57292702	mdo-mir-7398a-4	0	+
chrX	57293441	57293500	mdo-mir-7398a-3	0	+
chrX	57293920	57293979	mdo-mir-7398a-5	0	+
chrX	57294561	57294624	mdo-novel-241	0	+
chrX	57296465	57296526	mdo-mir-7398p	0	+
chrX	57297039	57297098	mdo-mir-7398q	0	+
chrX	57297720	57297779	mdo-mir-7398d	0	+
chrX	57298335	57298390	mdo-mir-7398s	0	+
chrX	57301458	57301516	mdo-mir-7398u	0	+
chrX	57306265	57306324	mdo-mir-7398j	0	+
chrX	57307980	57308039	mdo-mir-7398g	0	+
chrX	57311981	57312040	mdo-mir-7398h	0	+
chrX	57314587	57314647	mdo-mir-7398t	0	+
chrX	57315815	57315875	mdo-novel-242	0	+
chrX	57318975	57319034	mdo-novel-243	0	+
chrX	57321994	57322057	mdo-mir-7398i	0	+
chrX	57326898	57326956	mdo-mir-7399	0	+
chrX	57502217	57502278	mdo-mir-7376	0	-
chrX	63562539	63562599	mdo-novel-244	0	+
chrX	63602584	63602642	mdo-novel-245	0	+
chrX	66802579	66802638	mdo-mir-7360-1	0	+
chrX	66803744	66803800	mdo-mir-7359a-1	0	+
chrX	66805278	66805337	mdo-mir-7360-9	0	+
chrX	66806443	66806499	mdo-mir-7359a-2	0	+
chrX	66807976	66808035	mdo-mir-7360-2	0	+
chrX	66809141	66809197	mdo-mir-7359b-1	0	+
chrX	66810675	66810734	mdo-mir-7360-3	0	+
chrX	66811840	66811896	mdo-mir-7359b-2	0	+
chrX	66813374	66813433	mdo-mir-7360-4	0	+
chrX	66814539	66814595	mdo-mir-7359b-3	0	+
chrX	66816073	66816132	mdo-mir-7360-5	0	+
chrX	66817217	66817273	mdo-mir-7359a-3	0	+
chrX	67204020	67204078	mdo-mir-7362	0	+
chrX	67675787	67675845	mdo-novel-246	0	-
chrX	67691161	67691220	mdo-mir-7378	0	-
chrX	67706763	67706818	mdo-mir-7379	0	-
chrX	67707709	67707768	mdo-novel-247	0	-
chrX	67721625	67721685	mdo-mir-7380	0	-
chrX	67783334	67783396	mdo-novel-248	0	-
chrX	68640948	68641005	mdo-mir-7381	0	-
chrX	69497179	69497241	mdo-novel-249	0	+
chrX	69500451	69500514	mdo-novel-250	0	+
chrX	70038802	70038861	mdo-mir-7382	0	-
chrX	72810047	72810104	mdo-novel-251	0	-
chrX	73620076	73620132	mdo-novel-252	0	-
chrX	79112397	79112456	mdo-novel-253	0	+

## Sheet: TableS1C_Chicken_miRNA_loci
chr1	142051	142112	gga-novel-1	0	+
chr1	292473	292583	gga-mir-6708	0	+
chr1	317085	317182	gga-mir-1604	0	+
chr1	539154	539238	gga-mir-1651	0	+
chr1	843241	843306	gga-novel-2	0	-
chr1	844265	844329	gga-novel-3	0	-
chr1	844361	844459	gga-mir-183	0	-
chr1	907621	907731	gga-mir-6676	0	-
chr1	917735	917845	gga-mir-6629	0	+
chr1	1273691	1273789	gga-mir-205b	0	-
chr1	1698305	1698415	gga-mir-6659	0	-
chr1	2713343	2713453	gga-mir-6621	0	+
chr1	3433758	3433839	gga-mir-29b-1	0	+
# Genomic coordinates of all known (miRBase) and novel miRNA precursors analysed in this study
# Genome release: galGal5
# All novel precursors have been submitted to miRBase
chr1	3434775	3434864	gga-mir-29a	0	+
chr1	5693451	5693541	gga-mir-1626	0	+
chr1	5811651	5811741	gga-mir-1596	0	+
chr1	6954123	6954222	gga-mir-1460	0	-
chr1	14768809	14768955	gga-mir-2126	0	-
chr1	23377360	23377424	gga-mir-1645	0	-
chr1	26725636	26725715	gga-mir-1695	0	+
chr1	28697871	28697929	gga-novel-4	0	+
chr1	29613911	29613973	gga-mir-7447	0	+
chr1	33060796	33060880	gga-let-7i	0	+
chr1	46258843	46258934	gga-mir-1691	0	+
chr1	46334584	46334684	gga-mir-135a-2	0	+
chr1	48389946	48390048	gga-mir-6581	0	-
chr1	49300759	49300845	gga-mir-1581	0	+
chr1	49529872	49529941	gga-mir-33-1	0	-
chr1	49924839	49924940	gga-mir-1683	0	-
chr1	50452618	50452677	gga-novel-5	0	-
chr1	51772079	51772162	gga-mir-1742	0	+
chr1	54275697	54275786	gga-novel-6	0	+
chr1	54784280	54784334	gga-mir-7450	0	+
chr1	54793872	54793926	gga-mir-7450_M1	0	+
chr1	56491717	56491778	gga-novel-7	0	-
chr1	57923978	57924071	gga-mir-490	0	-
chr1	59412539	59412648	gga-mir-6700	0	-
chr1	59634266	59634356	gga-mir-1593	0	+
chr1	65891956	65892066	gga-mir-6608-1_M1	0	+
chr1	65891956	65892066	gga-mir-6608-2_M2	0	+
chr1	65895166	65895276	gga-mir-6608-1	0	+
chr1	65898376	65898486	gga-mir-6608-1_M2	0	+
chr1	65898376	65898486	gga-mir-6608-2_M1	0	+
chr1	67209490	67209545	gga-mir-7451	0	+
chr1	71291483	71291555	gga-let-7a-3	0	+
chr1	71292309	71292394	gga-let-7b	0	+
chr1	71561178	71561284	gga-mir-1727	0	+
chr1	71873601	71873661	gga-novel-8	0	-
chr1	76447762	76447872	gga-mir-6606	0	-
chr1	79931570	79931680	gga-mir-6609	0	+
chr1	80759492	80759563	gga-mir-3539	0	+
chr1	83828700	83828804	gga-mir-1690	0	+
chr1	88559232	88559295	gga-mir-7446	0	-
chr1	92351544	92351654	gga-mir-6616	0	+
chr1	93829815	93829900	gga-mir-1806	0	-
chr1	94675707	94675766	gga-novel-9	0	+
chr1	99018040	99018121	gga-mir-99a	0	+
chr1	99018803	99018870	gga-let-7c	0	+
chr1	99051078	99051168	gga-mir-125b-2	0	+
chr1	102485098	102485161	gga-mir-155	0	+
chr1	104756552	104756643	gga-mir-1738	0	+
chr1	105832016	105832132	gga-mir-3524a	0	-
chr1	105832032	105832116	gga-mir-3525	0	+
chr1	106605860	106605928	gga-mir-7452	0	+
chr1	110650029	110650127	gga-mir-222a	0	+
chr1	110650533	110650632	gga-mir-221	0	+
chr1	112625565	112625675	gga-mir-6672	0	+
chr1	126122758	126122815	gga-mir-7448	0	-
chr1	126961687	126961792	gga-mir-1397	0	+
chr1	131070173	131070257	gga-mir-1805	0	-
chr1	133113084	133113193	gga-mir-6559	0	-
chr1	133654034	133654100	gga-mir-1656	0	+
chr1	133682275	133682358	gga-mir-1552_M1	0	+
chr1	133686508	133686616	gga-mir-6543_M1	0	+
chr1	136743822	136743922	gga-mir-1700	0	+
chr1	139198639	139198738	gga-mir-1736	0	-
chr1	139858334	139858425	gga-mir-1632	0	+
chr1	144520188	144520258	gga-novel-10	0	+
chr1	144936069	144936155	gga-mir-1555	0	-
chr1	148023262	148023340	gga-mir-92-1	0	-
chr1	148023375	148023462	gga-mir-19b	0	-
chr1	148023498	148023596	gga-mir-20a	0	-
chr1	148023684	148023765	gga-mir-19a	0	-
chr1	148023818	148023911	gga-mir-18a	0	-
chr1	148023973	148024058	gga-mir-17	0	-
chr1	156695126	156695229	gga-mir-1743	0	+
chr1	161765491	161765551	gga-mir-7445-2	0	-
chr1	161765493	161765553	gga-mir-7445-1	0	+
chr1	165879962	165880066	gga-mir-2127	0	+
chr1	167040276	167040376	gga-mir-6555	0	-
chr1	168016562	168016620	gga-novel-11	0	-
chr1	169399050	169399134	gga-mir-16-1	0	-
chr1	169399192	169399275	gga-mir-15a	0	-
chr1	175210870	175210964	gga-mir-1646	0	-
chr1	175931281	175931391	gga-mir-6656	0	-
chr1	179212020	179212124	gga-mir-6641	0	+
chr1	180999372	180999454	gga-mir-1709	0	+
chr1	181232500	181232552	gga-novel-12	0	-
chr1	182377258	182377326	gga-mir-7449	0	-
chr1	185065706	185065806	gga-mir-6570	0	+
chr1	188362793	188362887	gga-mir-1657	0	+
chr1	190157043	190157140	gga-mir-1664	0	-
chr1	193059197	193059262	gga-novel-13	0	+
chr1	194366429	194366509	gga-mir-1600	0	+
chr1	195334038	195334132	gga-mir-1708	0	-
chr1_NT_456233v1_random	13388	13473	gga-let-7b_M1	0	-
chr1_NT_456233v1_random	14227	14299	gga-let-7a-3_M1	0	-
chr1_NT_457167v1_random	1645	1705	gga-mir-7445-1_M1	0	-
chr1_NT_457167v1_random	1647	1707	gga-mir-7445-2_M1	0	+
chr10	786644	786704	gga-mir-1670	0	-
chr10	1126180	1126290	gga-mir-6692	0	-
chr10	1255069	1255157	gga-novel-14	0	+
chr10	1296882	1296953	gga-mir-1688	0	-
chr10	1503991	1504101	gga-mir-6660	0	-
chr10	1942148	1942244	gga-mir-1623	0	+
chr10	2314972	2315082	gga-mir-6625	0	-
chr10	2333558	2333622	gga-mir-2128	0	-
chr10	2448421	2448531	gga-mir-6703	0	-
chr10	2480971	2481069	gga-mir-1794	0	+
chr10	2623650	2623758	gga-mir-6575	0	-
chr10	4206000	4206085	gga-mir-190a	0	-
chr10	5628303	5628377	gga-mir-1574	0	+
chr10	5628576	5628677	gga-mir-204-2	0	+
chr10	10668516	10668586	gga-mir-147	0	+
chr10	10770944	10771038	gga-mir-6596	0	-
chr10	11060289	11060351	gga-mir-3540	0	+
chr10	12934136	12934193	gga-novel-15	0	+
chr10	13134584	13134649	gga-mir-1720	0	-
chr10	13134719	13134818	gga-mir-7-2	0	-
chr10	13134723	13134814	gga-mir-3529	0	+
chr10	15878828	15878917	gga-mir-1680	0	+
chr10	16597655	16597729	gga-mir-1813-2	0	+
chr10	17092553	17092646	gga-mir-1737	0	+
chr10	17874931	17875023	gga-mir-1722	0	-
chr10	19093372	19093446	gga-mir-1642	0	+
chr10	19163481	19163567	gga-novel-16	0	+
chr10	19176434	19176534	gga-mir-6550	0	+
chr10	19996769	19996843	gga-mir-184	0	+
chr10	19996778	19996841	gga-novel-17	0	-
chr10	20135923	20135980	gga-novel-18	0	-
chr10_NT_461817v1_random	1453	1549	gga-mir-1623_M1	0	-
chr11	615292	615402	gga-mir-6709	0	-
chr11	1043667	1043741	gga-novel-19	0	-
chr11	1329573	1329667	gga-mir-1616	0	-
chr11	1463265	1463325	gga-novel-20	0	+
chr11	2000811	2000906	gga-mir-1643	0	-
chr11	2104524	2104607	gga-mir-138-2	0	-
chr11	9006368	9006431	gga-mir-1789	0	+
chr11	9086637	9086722	gga-mir-1791	0	+
chr11	11215737	11215847	gga-mir-6589	0	-
chr11	11478839	11478935	gga-mir-1634-1_M1	0	+
chr11	11478839	11478935	gga-mir-1634-2_M1	0	+
chr11	13466649	13466759	gga-mir-6595	0	-
chr11	18632363	18632461	gga-mir-1571	0	+
chr11	18874319	18874423	gga-mir-1560	0	-
chr11	18926658	18926760	gga-mir-1785	0	-
chr11	19007942	19008052	gga-mir-6667	0	+
chr11	19310300	19310395	gga-mir-140	0	+
chr11	19730961	19731058	gga-mir-1699	0	-
chr11_NT_461897v1_random	10720	10816	gga-mir-1634-1_M2	0	-
chr11_NT_461897v1_random	10720	10816	gga-mir-1634-2_M2	0	-
chr12	783183	783254	gga-mir-1563	0	+
chr12	884863	884952	gga-mir-1719	0	-
chr12	2538547	2538633	gga-mir-1678	0	-
chr12	2561661	2561729	gga-novel-21	0	-
chr12	2971910	2971989	gga-let-7g	0	-
chr12	2998996	2999084	gga-mir-135a-1	0	-
chr12	5317527	5317605	gga-novel-22	0	-
chr12	5317529	5317608	gga-novel-23	0	+
chr12	6091057	6091160	gga-let-7d	0	-
chr12	6092105	6092183	gga-let-7f	0	-
chr12	6092521	6092594	gga-let-7a-1	0	-
chr12	8760129	8760219	gga-mir-1787	0	+
chr12	8808637	8808738	gga-mir-1783	0	+
chr12	9418107	9418202	gga-mir-1572	0	-
chr12	10660970	10661072	gga-mir-1731	0	-
chr12	11108223	11108333	gga-mir-6684	0	+
chr12	11670978	11671038	gga-novel-24	0	+
chr12	11671362	11671425	gga-novel-25	0	+
chr12	12877181	12877279	gga-mir-1550	0	+
chr12	16440166	16440234	gga-mir-1711	0	-
chr12_NT_462054v1_random	294	367	gga-novel-26	0	-
chr13	2077695	2077779	gga-mir-1702	0	+
chr13	4563942	4564037	gga-mir-218-2	0	+
chr13	4689829	4689907	gga-mir-103-1	0	+
chr13	4700574	4700678	gga-mir-6569	0	+
chr13	7795766	7795865	gga-mir-146a	0	-
chr13	8233310	8233426	gga-mir-458a	0	-
chr13	8233316	8233418	gga-mir-458b	0	+
chr13	8492496	8492557	gga-novel-27	0	-
chr13	8493108	8493164	gga-novel-28	0	-
chr13	8923373	8923483	gga-mir-6652	0	+
chr13	9054475	9054641	gga-mir-3523	0	-
chr13	10375305	10375366	gga-mir-7460	0	-
chr13	12142844	12142917	gga-mir-1778	0	-
chr13	16932633	16932727	gga-mir-1609	0	+
chr13	17162740	17162796	gga-novel-29	0	-
chr13	17553408	17553518	gga-mir-6588	0	-
chr13	18027770	18027865	gga-mir-1576	0	+
chr14	759894	760004	gga-mir-6686	0	+
chr14	764295	764378	gga-mir-193b	0	+
chr14	769101	769211	gga-mir-365b	0	-
chr14	769113	769198	gga-mir-365-1	0	+
chr14	3325511	3325604	gga-mir-1781	0	-
chr14	4005589	4005651	gga-novel-30	0	+
chr14	4007737	4007821	gga-mir-2129	0	+
chr14	4192482	4192566	gga-mir-3533	0	-
chr14	4947155	4947228	gga-mir-1682	0	+
chr14	5241006	5241096	gga-mir-1551	0	+
chr14	5821582	5821661	gga-mir-1554	0	+
chr14	6750465	6750558	gga-mir-1615	0	+
chr14	7328403	7328510	gga-mir-6548	0	-
chr14	7768587	7768696	gga-mir-1786	0	+
chr14	8176838	8176924	gga-mir-1644	0	+
chr14	12314152	12314218	gga-mir-1763	0	+
chr14	12315004	12315075	gga-mir-1564	0	-
chr14	13204037	13204147	gga-mir-6643	0	-
chr14	14147506	14147608	gga-mir-1588	0	-
chr14	14307703	14307805	gga-mir-1715	0	-
chr14	14339055	14339115	gga-mir-7471	0	-
chr14	15022037	15022098	gga-novel-31	0	-
chr14_NT_462349v1_random	9291	9351	gga-mir-7471_M1	0	-
chr15	399150	399227	gga-mir-130b	0	-
chr15	400263	400384	gga-mir-454	0	-
chr15	406742	406835	gga-mir-301a	0	-
chr15	407967	408050	gga-mir-130a	0	-
chr15	743031	743093	gga-novel-32	0	+
chr15	749631	749731	gga-mir-1673	0	+
chr15	762733	762804	gga-mir-1729	0	+
chr15	1294135	1294204	gga-mir-1306	0	+
chr15	2239894	2239997	gga-mir-1769	0	+
chr15	4735875	4735963	gga-mir-1636	0	+
chr15	5022043	5022106	gga-mir-7476	0	+
chr15	5090718	5090778	gga-mir-1671	0	+
chr15	5751889	5751968	gga-mir-762	0	-
chr15	5824266	5824369	gga-mir-1764	0	+
chr15	6705938	6706037	gga-mir-6648-1	0	+
chr15	6827141	6827203	gga-novel-33	0	-
chr15	6975426	6975536	gga-mir-6635-1	0	+
chr15	7616545	7616625	gga-mir-1625	0	-
chr15	7731012	7731122	gga-mir-6650	0	-
chr15	7896923	7896978	gga-novel-34	0	-
chr15	8905697	8905807	gga-mir-6673	0	-
chr15	9319317	9319390	gga-novel-35	0	-
chr15	10018791	10018882	gga-mir-1640	0	+
chr15	11505275	11505385	gga-mir-1464	0	+
chr15_NT_462466v1_random	3027	3134	gga-mir-3594_M1	0	+
chr15_NT_462468v1_random	17715	17814	gga-mir-6648-1_M1	0	-
chr15_NT_462468v1_random	17715	17814	gga-mir-6648-2_M1	0	-
chr16	522799	522903	gga-mir-6566_M5	0	-
chr16	550655	550759	gga-mir-6566_M4	0	-
chr16	575848	575952	gga-mir-6566_M1	0	+
chr16_NT_462549v1_random	6032	6136	gga-mir-6566_M2	0	+
chr16_NT_462554v1_random	13340	13444	gga-mir-6566_M3	0	-
chr17	2320654	2320750	gga-mir-1707	0	+
chr17	2569204	2569267	gga-mir-7441	0	+
chr17	2943355	2943413	gga-mir-7442	0	+
chr17	5228296	5228399	gga-mir-6696	0	+
chr17	5239490	5239576	gga-mir-455	0	+
chr17	5485244	5485333	gga-mir-219b	0	-
chr17	5485247	5485332	gga-mir-219a	0	+
chr17	5512935	5512997	gga-novel-36	0	-
chr17	5571578	5571672	gga-mir-199-1	0	+
chr17	6423813	6423892	gga-mir-1753	0	+
chr17	8208157	8208254	gga-mir-3528	0	+
chr17	8233312	8233396	gga-mir-126	0	-
chr17	8654137	8654247	gga-mir-1465	0	+
chr17	9286705	9286795	gga-mir-1705	0	-
chr17	9982131	9982222	gga-mir-181a-2	0	+
chr17	9983771	9983856	gga-mir-181b-2	0	+
chr17	10000997	10001107	gga-mir-6712	0	-
chr17_NT_462614v1_random	3460	3518	gga-mir-7442_M1	0	-
chr18	810564	810645	gga-mir-1748	0	+
chr18	1286193	1286269	gga-novel-37	0	-
chr18	3869295	3869384	gga-novel-38	0	+
chr18	4170787	4170897	gga-mir-6516	0	-
chr18	5100493	5100590	gga-mir-6599	0	-
chr18	5287313	5287374	gga-novel-39	0	-
chr18	5911195	5911300	gga-mir-1765	0	+
chr18	6481067	6481152	gga-mir-1561	0	+
chr18	6491326	6491403	gga-mir-193a_M1	0	+
chr18	6504852	6504948	gga-mir-365-2	0	+
chr18	6961442	6961566	gga-mir-3064	0	-
chr18	8236749	8236817	gga-novel-40	0	-
chr18	8852693	8852769	gga-mir-1672	0	-
chr18	9383534	9383595	gga-novel-41	0	+
chr18	9400611	9400719	gga-mir-6551	0	-
chr18	9720247	9720343	gga-mir-1652	0	-
chr18	9815974	9816033	gga-mir-7443	0	+
chr18	10349155	10349220	gga-mir-1637	0	-
chr18	10687036	10687109	gga-mir-1580	0	-
chr19	510412	510500	gga-mir-142	0	-
chr19	640933	641040	gga-mir-1698-2	0	-
chr19	640933	641040	gga-mir-1698-1	0	-
chr19	1707064	1707153	gga-mir-1567	0	-
chr19	1792019	1792095	gga-mir-1354	0	-
chr19	1798668	1798764	gga-mir-1587	0	-
chr19	2914227	2914290	gga-mir-7444	0	-
chr19	3182035	3182145	gga-mir-6592	0	+
chr19	4141744	4141806	gga-novel-42	0	-
chr19	5039445	5039555	gga-mir-6585	0	+
chr19	5346790	5346847	gga-novel-43	0	-
chr19	5380347	5380447	gga-mir-22	0	-
chr19	5515021	5515080	gga-novel-44	0	-
chr19	5515025	5515081	gga-novel-45	0	+
chr19	5515202	5515261	gga-novel-46	0	-
chr19	5515204	5515263	gga-novel-47	0	+
chr19	5515769	5515834	gga-novel-48	0	-
chr19	5515770	5515836	gga-novel-49	0	+
chr19	5563945	5564035	gga-mir-1666	0	-
chr19	5602838	5602908	gga-mir-1696	0	-
chr19	5863035	5863104	gga-mir-451	0	-
chr19	5863190	5863275	gga-mir-144	0	-
chr19	6062847	6062912	gga-novel-50	0	-
chr19	7202691	7202781	gga-mir-301b	0	-
chr19	7202979	7203073	gga-mir-130c	0	-
chr19	7250448	7250527	gga-mir-1697	0	+
chr19	7376246	7376343	gga-mir-21	0	+
chr19	8077898	8077956	gga-novel-51	0	+
chr19	8696085	8696195	gga-mir-6639	0	-
chr19	8857928	8858019	gga-mir-1585	0	-
chr19	9392617	9392684	gga-mir-1592	0	-
chr19	9416329	9416433	gga-mir-1689	0	-
chr19_NT_462743v1_random	7369	7448	gga-mir-1697_M1	0	-
chr2	309949	310016	gga-novel-52	0	+
chr2	412760	412822	gga-novel-53	0	+
chr2	573268	573366	gga-mir-1749	0	+
chr2	728232	728342	gga-mir-6710	0	-
chr2	926176	926244	gga-novel-54	0	-
chr2	969747	969834	gga-mir-7461_M1	0	-
chr2	974736	974823	gga-mir-7461_M3	0	-
chr2	979725	979812	gga-mir-7461_M2	0	-
chr2	986862	986949	gga-mir-7461	0	-
chr2	1839178	1839251	gga-mir-1662	0	+
chr2	2521302	2521412	gga-mir-6713	0	-
chr2	3293383	3293455	gga-mir-1639	0	-
chr2	3692579	3692669	gga-mir-460a	0	+
chr2	3856395	3856469	gga-mir-1706	0	-
chr2	4575293	4575370	gga-mir-26a	0	+
chr2	4915022	4915132	gga-mir-6610	0	+
chr2	5837822	5837932	gga-mir-6600	0	-
chr2	6407951	6408008	gga-novel-55	0	-
chr2	6787493	6787599	gga-mir-6554	0	+
chr2	8846564	8846651	gga-mir-153	0	-
chr2	12131148	12131258	gga-mir-6628	0	-
chr2	14132582	14132659	gga-mir-1768	0	+
chr2	17740150	17740211	gga-novel-56	0	-
chr2	19829158	19829219	gga-mir-1661	0	-
chr2	21752897	21752966	gga-mir-466	0	+
chr2	22742585	22742678	gga-mir-1650	0	-
chr2	23147299	23147383	gga-mir-489	0	-
chr2	23912030	23912140	gga-mir-6601	0	+
chr2	24811596	24811691	gga-mir-1685	0	+
chr2	32178253	32178321	gga-mir-148a	0	-
chr2	32706291	32706392	gga-mir-1732-3	0	-
chr2	32706291	32706392	gga-mir-1732-1	0	-
chr2	32706291	32706392	gga-mir-1732-2	0	-
chr2	32707473	32707567	gga-mir-196-2	0	-
chr2	32707473	32707567	gga-mir-196-4	0	-
chr2	32707473	32707567	gga-mir-196-5	0	-
chr2	40348947	40349044	gga-mir-1622	0	-
chr2	40874170	40874266	gga-mir-138-1	0	-
chr2	41506153	41506259	gga-mir-1723	0	-
chr2	44141500	44141554	gga-mir-7457	0	+
chr2	45574699	45574778	gga-mir-1607	0	+
chr2	45670112	45670196	gga-mir-128-2	0	+
chr2	56306826	56306890	gga-mir-7458-1_M2	0	+
chr2	56306826	56306890	gga-mir-7458-2_M2	0	+
chr2	56324866	56324930	gga-mir-7458-1_M1	0	+
chr2	56324866	56324930	gga-mir-7458-2_M1	0	+
chr2	57947958	57948026	gga-mir-7459	0	+
chr2	61829375	61829452	gga-mir-1747	0	-
chr2	62727635	62727710	gga-mir-1759	0	-
chr2	64574422	64574528	gga-mir-6571	0	+
chr2	68054393	68054503	gga-mir-6698	0	+
chr2	68751323	68751422	gga-mir-1782	0	+
chr2	71893321	71893428	gga-mir-6545	0	+
chr2	76674754	76674836	gga-mir-757	0	-
chr2	78055577	78055654	gga-mir-1613	0	+
chr2	82060203	82060313	gga-mir-6562_M2	0	-
chr2	83889611	83889697	gga-mir-187	0	+
chr2	84498502	84498572	gga-mir-32	0	-
chr2	88587377	88587482	gga-mir-1816	0	+
chr2	90394981	90395041	gga-mir-7455_M1	0	-
chr2	92880218	92880307	gga-mir-1803	0	+
chr2	93858570	93858680	gga-mir-6584	0	-
chr2	94286976	94287076	gga-mir-1681	0	-
chr2	95943669	95943779	gga-mir-3524b	0	-
chr2	97511154	97511264	gga-mir-6701	0	-
chr2	97739114	97739198	gga-novel-57	0	-
chr2	102812733	102812820	gga-mir-133a-1	0	-
chr2	102815859	102815944	gga-mir-1a-2	0	-
chr2	104089459	104089532	gga-mir-1597	0	-
chr2	107155774	107155884	gga-mir-6707	0	+
chr2	113270574	113270644	gga-mir-1557	0	+
chr2	114701956	114702057	gga-mir-124c	0	-
chr2	114701963	114702059	gga-mir-124a	0	+
chr2	114704972	114705048	gga-mir-1714	0	+
chr2	115467759	115467817	gga-mir-7456	0	-
chr2	117059290	117059360	gga-mir-1569	0	-
chr2	117887405	117887475	gga-mir-1796	0	+
chr2	129537723	129537833	gga-mir-6630	0	-
chr2	131521312	131521398	gga-mir-1813-1	0	+
chr2	136000985	136001095	gga-mir-1467-1	0	-
chr2	136000985	136001095	gga-mir-1467-2	0	-
chr2	137176404	137176491	gga-mir-1457	0	-
chr2	142757714	142757801	gga-mir-30b	0	-
chr2	142761259	142761323	gga-mir-30d	0	-
chr2	145759817	145759925	gga-mir-6572	0	-
chr2	146015772	146015869	gga-mir-1770	0	+
chr2_NT_457890v1_random	25331	25441	gga-mir-6562_M1	0	+
chr2_NT_457893v1_random	24364	24433	gga-novel-84	0	-
chr2_NT_457946v1_random	3925	4032	gga-mir-6545_M1	0	-
chr2_NT_458298v1_random	4785	4858	gga-mir-1662_M1	0	-
chr20	640877	640987	gga-mir-6664	0	-
chr20	1000509	1000594	gga-mir-1558	0	-
chr20	1424638	1424712	gga-mir-1453	0	-
chr20	2070244	2070308	gga-mir-7453	0	-
chr20	2236550	2236660	gga-mir-6674	0	-
chr20	2734853	2734944	gga-mir-499	0	-
chr20	5087607	5087689	gga-mir-1614	0	+
chr20	8315739	8315810	gga-mir-1a-1	0	+
chr20	8317044	8317122	gga-mir-1773	0	+
chr20	8326962	8327058	gga-mir-133a-2	0	+
chr20	8606305	8606415	gga-mir-6681	0	-
chr20	8632750	8632857	gga-mir-6567	0	-
chr20	8835169	8835269	gga-mir-1746	0	-
chr20	8883518	8883579	gga-novel-58	0	+
chr20	8883885	8883983	gga-mir-124a-2	0	+
chr20	9710465	9710529	gga-novel-59	0	-
chr20	9710468	9710529	gga-novel-60	0	+
chr20	9880672	9880768	gga-mir-1798	0	-
chr20	10004104	10004169	gga-novel-61	0	-
chr20	10276841	10276906	gga-novel-62	0	-
chr20	10780064	10780120	gga-novel-63	0	+
chr20	11097595	11097705	gga-mir-6597	0	-
chr20	11146402	11146500	gga-mir-6564	0	-
chr20	13293638	13293747	gga-mir-6677	0	+
chr20	13296362	13296453	gga-mir-1687	0	+
chr20	14035953	14036039	gga-mir-1648	0	+
chr21	1725943	1726050	gga-mir-1635	0	-
chr21	2369605	2369683	gga-mir-1795	0	+
chr21	2589431	2589515	gga-mir-429	0	-
chr21	2591936	2592023	gga-mir-200a	0	-
chr21	2594261	2594346	gga-mir-200b	0	-
chr21	2632686	2632796	gga-mir-6680	0	+
chr21	3262991	3263100	gga-mir-34a	0	-
chr21	4626343	4626453	gga-mir-6626	0	-
chr21	5006615	5006673	gga-novel-64	0	-
chr22	60608	60714	gga-mir-6576	0	+
chr22	2664304	2664473	gga-mir-2188	0	-
chr22	4649591	4649651	gga-novel-65	0	+
chr22_NT_463025v1_random	5998	6058	gga-novel-66	0	-
chr23	443911	443998	gga-mir-3531	0	-
chr23	487364	487442	gga-novel-67	0	-
chr23	2223485	2223578	gga-mir-124b	0	+
chr23	2768522	2768624	gga-mir-1724	0	+
chr23	4355777	4355833	gga-novel-68	0	+
chr23	4357024	4357088	gga-mir-1b	0	+
chr23	4357163	4357242	gga-mir-133c	0	+
chr23	4946131	4946227	gga-mir-30e	0	+
chr23	4947354	4947443	gga-mir-30c-1	0	+
chr23	5087391	5087467	gga-mir-1780	0	-
chr23	5225416	5225526	gga-mir-6637-1	0	+
chr23	5232872	5232982	gga-mir-6637-2	0	+
chr23_NT_463087v1_random	21648	21741	gga-mir-124b_M2	0	+
chr23_NT_463117v1_random	2682	2775	gga-mir-124b_M1	0	+
chr24	27574	27645	gga-mir-1758	0	-
chr24	450651	450714	gga-novel-69	0	+
chr24	2012308	2012385	gga-mir-1601	0	+
chr24	3170509	3170599	gga-mir-1807	0	+
chr24	3335096	3335176	gga-mir-100	0	+
chr24	3341723	3341832	gga-mir-6675	0	+
chr24	3343199	3343266	gga-let-7a-2	0	+
chr24	4173822	4173932	gga-mir-1466	0	+
chr24	5039304	5039414	gga-mir-6671	0	+
chr24	5109318	5109380	gga-novel-70	0	+
chr24	5291925	5292012	gga-mir-1667	0	-
chr24	5539133	5539217	gga-mir-34b	0	+
chr24	5539870	5539944	gga-mir-34c	0	+
chr24_NT_463159v1_random	7049	7139	gga-mir-1807_M1	0	+
chr25	1539518	1539575	gga-novel-71	0	-
chr25	1578295	1578357	gga-novel-72	0	-
chr25	1637950	1638060	gga-mir-6662	0	-
chr25	2120333	2120393	gga-novel-73	0	-
chr25	2139768	2139846	gga-mir-3536	0	+
chr25	2201878	2201971	gga-mir-1629	0	+
chr25	2277995	2278077	gga-mir-1752	0	+
chr25	2411754	2411864	gga-mir-6646-1	0	+
chr25	2809803	2809913	gga-mir-6620	0	+
chr25_NT_463213v1_random	7627	7737	gga-mir-6662_M1	0	-
chr26	682613	682723	gga-mir-6607	0	-
chr26	1143843	1143901	gga-novel-74	0	+
chr26	1188263	1188312	gga-novel-75	0	+
chr26	1639930	1640009	gga-let-7j	0	-
chr26	1640135	1640207	gga-let-7k	0	-
chr26	1761690	1761800	gga-mir-6618	0	-
chr26	2124002	2124098	gga-mir-135a-3	0	-
chr26	2279190	2279291	gga-mir-1797	0	-
chr26	2287350	2287460	gga-mir-6602	0	-
chr26	2698810	2698899	gga-mir-29c	0	-
chr26	2699721	2699801	gga-mir-29b-2	0	-
chr26	2853092	2853202	gga-mir-6654	0	-
chr26	3076069	3076165	gga-mir-205a	0	+
chr26	3076088	3076146	gga-novel-76	0	-
chr26	3215893	3215960	gga-novel-77	0	+
chr26	3626429	3626520	gga-mir-1669	0	+
chr26	5270405	5270459	gga-mir-7454	0	-
chr27	442674	442784	gga-mir-6644-2	0	+
chr27	1310052	1310162	gga-mir-6695	0	+
chr27	1416581	1416645	gga-novel-78	0	+
chr27	1690902	1691021	gga-mir-6573	0	+
chr27	3775035	3775130	gga-mir-196-1	0	+
chr27	3834169	3834243	gga-mir-10a	0	+
chr27	4371071	4371181	gga-mir-6663	0	-
chr27	4391228	4391307	gga-mir-1735	0	+
chr27	4660682	4660802	gga-mir-6547	0	+
chr27	4805603	4805671	gga-novel-79	0	+
chr27	5284831	5284905	gga-novel-80	0	-
chr27	5301386	5301454	gga-novel-81	0	-
chr28	1360672	1360751	gga-mir-1774	0	+
chr28	1402698	1402815	gga-mir-6593_M1	0	-
chr28	1453230	1453307	gga-mir-1434	0	+
chr28	1760724	1760835	gga-mir-6615	0	-
chr28	2246984	2247058	gga-mir-211	0	+
chr28	2280563	2280670	gga-mir-1647	0	+
chr28	3066595	3066656	gga-novel-82	0	-
chr28	3243052	3243147	gga-mir-1777	0	+
chr28	3620262	3620333	gga-mir-1621	0	+
chr28	3621529	3621611	gga-mir-1565	0	+
chr28	3623170	3623258	gga-mir-9-1	0	+
chr28	3917468	3917535	gga-novel-83	0	+
chr28	4301638	4301748	gga-mir-6693	0	+
chr28	4722718	4722828	gga-mir-6666	0	+
chr28	4892798	4892893	gga-mir-7-3	0	-
chr28_NT_463386v1_random	5930	6025	gga-mir-1777_M1	0	-
chr3	315407	315514	gga-mir-217	0	-
chr3	318075	318181	gga-mir-216a	0	-
chr3	323482	323571	gga-mir-216b	0	-
chr3	323484	323570	gga-mir-216c	0	+
chr3	762579	762689	gga-mir-6583	0	+
chr3	1046129	1046191	gga-mir-7463	0	+
chr3	3796469	3796571	gga-mir-1740	0	+
chr3	4430920	4431047	gga-mir-6542	0	+
chr3	7810856	7810955	gga-mir-1792	0	+
chr3	10070500	10070610	gga-mir-6711	0	-
chr3	12516661	12516771	gga-mir-6631	0	+
chr3	13265622	13265717	gga-mir-1641	0	-
chr3	14691860	14691949	gga-mir-1756b	0	-
chr3	15593874	15593989	gga-mir-3526	0	+
chr3	16898368	16898425	gga-mir-7464	0	+
chr3	18822852	18822927	gga-mir-194	0	+
chr3	18823158	18823263	gga-mir-215	0	+
chr3	21881901	21881999	gga-mir-1649	0	+
chr3	22192448	22192529	gga-novel-85	0	-
chr3	22223148	22223258	gga-mir-6640	0	+
chr3	22902036	22902111	gga-mir-1598	0	-
chr3	27382791	27382896	gga-mir-6580	0	-
chr3	30349124	30349193	gga-novel-86	0	+
chr3	30430041	30430151	gga-mir-4732	0	-
chr3	31514575	31514687	gga-mir-456	0	-
chr3	33863989	33864090	gga-mir-1717	0	+
chr3	35737907	35738010	gga-mir-1784	0	+
chr3	35737928	35737986	gga-novel-87	0	-
chr3	37593115	37593182	gga-mir-135b	0	+
chr3	40679117	40679193	gga-novel-88	0	-
chr3	43006396	43006455	gga-mir-1767	0	+
chr3	43216048	43216109	gga-novel-89	0	+
chr3	45728220	45728278	gga-novel-90	0	+
chr3	46373182	46373266	gga-mir-1734	0	+
chr3	54305756	54305817	gga-mir-7462	0	+
chr3	55382994	55383092	gga-mir-6568	0	+
chr3	56963006	56963106	gga-mir-1454	0	-
chr3	57474215	57474320	gga-mir-6582	0	+
chr3	58225141	58225251	gga-mir-6697	0	+
chr3	58426564	58426618	gga-mir-1660	0	-
chr3	63130916	63130982	gga-mir-199b	0	+
chr3	67609935	67610045	gga-mir-6699	0	-
chr3	72329625	72329682	gga-novel-91	0	-
chr3	74231860	74231933	gga-mir-1677	0	+
chr3	75850123	75850221	gga-mir-1686	0	-
chr3	76267731	76267841	gga-mir-1451	0	+
chr3	79500140	79500213	gga-mir-1712	0	-
chr3	79870058	79870168	gga-mir-6670	0	+
chr3	80493162	80493272	gga-mir-6633	0	+
chr3	81786487	81786597	gga-mir-6687	0	-
chr3	81847761	81847814	gga-mir-7465	0	-
chr3	82629083	82629155	gga-mir-30a	0	+
chr3	82653697	82653769	gga-mir-30c-2	0	+
chr3	84548704	84548814	gga-mir-6605	0	-
chr3	87201449	87201508	gga-novel-92	0	-
chr3	87380938	87381001	gga-novel-93	0	+
chr3	89887285	89887395	gga-mir-6634	0	-
chr3	96912434	96912493	gga-novel-94	0	-
chr3	97164289	97164399	gga-mir-6655	0	+
chr3	97355528	97355623	gga-mir-1329	0	+
chr3	103172071	103172181	gga-mir-6678	0	+
chr3	105429050	105429152	gga-mir-6578	0	+
chr3	107831725	107831835	gga-mir-6690	0	-
chr3	107838930	107839040	gga-mir-6702	0	+
chr3	108040384	108040468	gga-mir-133b	0	-
chr3	108045181	108045257	gga-mir-206	0	-
chr3_NT_459026v1_random	9668	9746	gga-mir-7478_M3	0	+
chr3_NT_459228v1_random	2285	2386	gga-mir-1717_M1	0	+
chr3_NT_459419v1_random	968	1078	gga-mir-6655_M1	0	-
chr30_NT_463422v1_random	25881	25939	gga-novel-95	0	-
chr33	217269	217359	gga-mir-1668_M1	0	-
chr33	874766	874828	gga-mir-7477_M1	0	-
chr33	903920	903985	gga-mir-2130_M1	0	-
chr33	1025336	1025444	gga-mir-196-3_M1	0	+
chr33	1093262	1093324	gga-novel-96	0	+
chr33	1171912	1171973	gga-novel-97	0	+
chr33	1576506	1576567	gga-novel-98	0	-
chr4	249564	249664	gga-mir-223	0	+
chr4	598335	598445	gga-mir-6594	0	+
chr4	1209299	1209409	gga-mir-6658	0	-
chr4	1258817	1258914	gga-mir-1586	0	-
chr4	1877669	1877738	gga-novel-99	0	-
chr4	1877717	1877804	gga-novel-100	0	-
chr4	1930775	1930872	gga-mir-1628	0	+
chr4	2183600	2183711	gga-mir-222b	0	+
chr4	2714080	2714170	gga-mir-460b	0	+
chr4	3241203	3241313	gga-mir-6689	0	-
chr4	3994428	3994493	gga-novel-101	0	-
chr4	3994838	3994923	gga-mir-20b	0	-
chr4	3995019	3995103	gga-mir-18b	0	-
chr4	3995150	3995231	gga-mir-106	0	-
chr4	4071444	4071515	gga-mir-16c	0	-
chr4	4071810	4071886	gga-mir-15c	0	-
chr4	8548163	8548273	gga-mir-1462	0	-
chr4	8680292	8680402	gga-mir-6704	0	+
chr4	10602620	10602705	gga-mir-1750	0	+
chr4	10981359	10981455	gga-mir-1728	0	-
chr4	11628646	11628751	gga-mir-1790	0	-
chr4	12350734	12350794	gga-novel-102	0	-
chr4	12520195	12520268	gga-mir-1573	0	-
chr4	13488993	13489062	gga-mir-1606	0	-
chr4	13813912	13814022	gga-mir-6614	0	+
chr4	15621995	15622105	gga-mir-6679	0	-
chr4	16645539	16645644	gga-mir-1757	0	-
chr4	16842688	16842765	gga-novel-104	0	-
chr4	17843444	17843507	gga-novel-105	0	-
chr4	18152770	18152837	gga-mir-7469	0	+
chr4	21129570	21129638	gga-novel-106	0	-
chr4	21597360	21597470	gga-mir-6682	0	+
chr4	21653670	21653725	gga-novel-107	0	+
chr4	21966871	21966981	gga-mir-6688	0	+
chr4	29768217	29768321	gga-mir-1575	0	-
chr4	34288535	34288645	gga-mir-6668	0	+
chr4	35010473	35010583	gga-mir-6591	0	+
chr4	39264543	39264613	gga-mir-1627	0	+
chr4	39800704	39800764	gga-novel-108	0	-
chr4	43888206	43888307	gga-mir-1776	0	+
chr4	45143208	45143318	gga-mir-6632	0	+
chr4	46721839	46721922	gga-mir-1804	0	+
chr4	48534498	48534591	gga-mir-1730	0	+
chr4	50422147	50422237	gga-mir-1751	0	+
chr4	51454469	51454557	gga-mir-1679	0	-
chr4	55084391	55084458	gga-mir-7468	0	-
chr4	57456278	57456350	gga-mir-302b	0	+
chr4	57456540	57456605	gga-mir-302c	0	+
chr4	57456662	57456743	gga-mir-1811	0	+
chr4	57456843	57456910	gga-mir-302a	0	+
chr4	57457178	57457247	gga-mir-302d	0	+
chr4	57457314	57457387	gga-mir-367	0	+
chr4	58512314	58512362	gga-mir-7466	0	+
chr4	59089898	59089975	gga-mir-122b	0	-
chr4	63465025	63465113	gga-mir-1605	0	-
chr4	64399451	64399524	gga-mir-383	0	+
chr4	69449239	69449349	gga-mir-6586	0	-
chr4	75581202	75581311	gga-mir-218-1	0	-
chr4	76824299	76824390	gga-mir-1602	0	+
chr4	77944503	77944556	gga-novel-109	0	+
chr4	79856977	79857054	gga-mir-1701	0	-
chr4	81308882	81308942	gga-novel-110	0	-
chr4	83231970	83232080	gga-mir-6661	0	+
chr4	83395401	83395464	gga-mir-7467	0	+
chr4	86084661	86084724	gga-novel-111	0	-
chr4	89095067	89095150	gga-mir-103-2	0	-
chr4	89315821	89315950	gga-mir-146c	0	-
chr4	89776511	89776605	gga-mir-1654	0	+
chr4	90285195	90285305	gga-mir-6627	0	-
chr4	90626427	90626486	gga-novel-112	0	+
chr4_NT_460132v1_random	4579	4652	gga-mir-383_M1	0	+
chr5	85801	85868	gga-novel-113	0	+
chr5	500361	500475	gga-mir-6579-1	0	-
chr5	940453	940544	gga-mir-1808	0	-
chr5	2412384	2412473	gga-mir-1775	0	+
chr5	3817702	3817795	gga-mir-1760	0	+
chr5	8127600	8127668	gga-mir-1568	0	-
chr5	9003779	9003841	gga-novel-114	0	+
chr5	10200270	10200380	gga-mir-1463	0	-
chr5	14141538	14141598	gga-novel-115	0	+
chr5	15887075	15887138	gga-novel-116	0	-
chr5	15887077	15887138	gga-novel-117	0	+
chr5	17069815	17069895	gga-mir-1802	0	-
chr5	21516910	21516976	gga-novel-118	0	+
chr5	22883984	22884053	gga-mir-1725	0	-
chr5	23106647	23106757	gga-mir-6603	0	+
chr5	23667293	23667403	gga-mir-6706	0	-
chr5	24455284	24455390	gga-mir-6544	0	-
chr5	25026258	25026358	gga-mir-6685	0	+
chr5	26193021	26193130	gga-mir-6587	0	-
chr5	27886398	27886478	gga-mir-1710	0	+
chr5	28336051	28336140	gga-mir-1617	0	+
chr5	30173953	30174063	gga-mir-6683	0	+
chr5	31460497	31460577	gga-mir-1718	0	-
chr5	32991424	32991508	gga-mir-3532	0	-
chr5	37909791	37909901	gga-mir-6598	0	-
chr5	39173709	39173819	gga-mir-6645	0	+
chr5	39282266	39282359	gga-mir-1739	0	+
chr5	39984546	39984630	gga-mir-1799	0	+
chr5	45227070	45227146	gga-mir-1800	0	+
chr5	45270642	45270746	gga-mir-6552	0	+
chr5	46491258	46491362	gga-mir-6590	0	-
chr5	50769282	50769380	gga-mir-203a	0	+
chr5	51686103	51686189	gga-mir-1771	0	-
chr5	55010405	55010472	gga-mir-7470_M7	0	-
chr5	55038474	55038541	gga-mir-7470_M2	0	-
chr5	55048552	55048619	gga-mir-7470_M5	0	-
chr5	55066227	55066294	gga-mir-7470_M4	0	-
chr5	55286133	55286200	gga-mir-1578	0	-
chr5	56261805	56261892	gga-mir-1638	0	+
chr5	56542820	56542920	gga-mir-1676	0	-
chr5	57722560	57722617	gga-novel-119	0	+
chr5	57845118	57845223	gga-mir-1716	0	-
chr5	58127886	58127975	gga-mir-1703	0	-
chr5_NT_460428v1_random	7871	7938	gga-mir-7470_M8	0	-
chr5_NT_460428v1_random	21271	21338	gga-mir-7470_M6	0	-
chr5_NT_460429v1_random	6594	6661	gga-mir-7470_M1	0	-
chr5_NT_460429v1_random	19976	20043	gga-mir-7470_M3	0	-
chr6	2663995	2664062	gga-mir-1579	0	+
chr6	4738247	4738298	gga-novel-120	0	+
chr6	10448958	10449027	gga-mir-1772	0	-
chr6	12431074	12431173	gga-mir-1590	0	-
chr6	15805662	15805737	gga-mir-1624	0	-
chr6	16941071	16941148	gga-mir-3537	0	+
chr6	17227035	17227143	gga-mir-6577	0	+
chr6	19401515	19401596	gga-mir-107	0	-
chr6	20059128	20059238	gga-mir-6657	0	+
chr6	21486721	21486810	gga-mir-202	0	+
chr6	22353377	22353487	gga-mir-6604	0	+
chr6	22802919	22803015	gga-mir-1674	0	+
chr6	23143385	23143490	gga-mir-146b	0	+
chr6	28124151	28124228	gga-mir-1815	0	+
chr6	30088762	30088825	gga-mir-7472	0	+
chr6	32376913	32377010	gga-mir-1726	0	-
chr6	32650888	32650998	gga-mir-6694	0	-
chr6_NT_460843v1_random	14589	14667	gga-mir-7478_M19	0	-
chr7	1274981	1275069	gga-mir-1812	0	-
chr7	1341237	1341313	gga-mir-1559	0	-
chr7	5436285	5436383	gga-mir-1694	0	-
chr7	5793700	5793810	gga-mir-6691-1	0	+
chr7	5793700	5793810	gga-mir-6691-2	0	+
chr7	6580436	6580522	gga-mir-1845	0	-
chr7	13729423	13729524	gga-mir-1659	0	-
chr7	15412868	15412943	gga-mir-7474	0	+
chr7	16321985	16322095	gga-mir-6624	0	+
chr7	16338831	16338930	gga-mir-1713	0	-
chr7	16343589	16343699	gga-mir-10b	0	-
chr7	19049815	19049899	gga-mir-1733	0	-
chr7	19406871	19406949	gga-mir-1591	0	-
chr7	22469939	22470004	gga-mir-375	0	+
chr7	22479316	22479404	gga-mir-1788	0	+
chr7	23825889	23825978	gga-mir-1582	0	+
chr7	23871793	23871898	gga-mir-1553	0	+
chr7	24501538	24501600	gga-mir-1599	0	+
chr7	25408506	25408595	gga-mir-3530	0	+
chr7	30766322	30766404	gga-mir-128-1	0	+
chr7	33572494	33572556	gga-mir-7473	0	+
chr7	35184304	35184378	gga-mir-1c	0	+
chr7	36448361	36448478	gga-mir-6546	0	-
chr7_NT_461218v1_random	4662	4738	gga-mir-1559_M1	0	-
chr8	2005168	2005272	gga-mir-181a-1	0	+
chr8	2005357	2005446	gga-mir-181b-1	0	+
chr8	3820822	3820925	gga-mir-1801	0	-
chr8	4652463	4652571	gga-mir-199-2	0	+
chr8	4658312	4658422	gga-mir-214	0	+
chr8	4658339	4658403	gga-novel-121	0	-
chr8	5006768	5006842	gga-mir-1721	0	-
chr8	5229602	5229712	gga-mir-6665	0	-
chr8	5334539	5334634	gga-mir-1633	0	-
chr8	7465625	7465704	gga-mir-1618	0	+
chr8	7519298	7519401	gga-mir-1655	0	+
chr8	11216321	11216426	gga-mir-6561	0	+
chr8	11705531	11705619	gga-mir-1610	0	-
chr8	12517006	12517102	gga-mir-137	0	+
chr8	16516611	16516690	gga-mir-1589	0	-
chr8	16867542	16867623	gga-mir-1761	0	-
chr8	18552908	18552996	gga-mir-1620	0	+
chr8	19809646	19809724	gga-mir-1665	0	+
chr8	19872410	19872520	gga-mir-6647	0	-
chr8	20837012	20837077	gga-mir-1595	0	-
chr8	22245940	22246050	gga-mir-6622	0	-
chr8	22766539	22766647	gga-mir-1809	0	-
chr8	24243082	24243184	gga-mir-1562	0	+
chr8	24565306	24565419	gga-mir-6549	0	+
chr8	24695551	24695661	gga-mir-6623	0	-
chr8	24727665	24727765	gga-mir-1675	0	-
chr8	28360429	28360505	gga-mir-101-2	0	-
chr8	28361179	28361252	gga-novel-122	0	-
chr8	28362265	28362331	gga-novel-123	0	-
chr8	28849708	28849818	gga-mir-6653	0	-
chr9	914528	914597	gga-novel-124	0	-
chr9	920006	920063	gga-mir-1630	0	+
chr9	3662051	3662116	gga-mir-7475_M1	0	+
chr9	4883787	4883858	gga-mir-1704	0	+
chr9	4975872	4975956	gga-mir-1612	0	+
chr9	5216846	5216939	gga-mir-1608	0	+
chr9	5463992	5464077	gga-mir-1577	0	+
chr9	7173064	7173137	gga-mir-1741	0	+
chr9	7623644	7623751	gga-mir-6574	0	-
chr9	10673201	10673311	gga-mir-1458	0	+
chr9	12336435	12336545	gga-mir-6611	0	-
chr9	13937045	13937143	gga-mir-1762	0	-
chr9	14383844	14383948	gga-mir-1653	0	-
chr9	15205926	15206048	gga-mir-6558	0	+
chr9	15324644	15324726	gga-mir-3535	0	-
chr9	15664205	15664296	gga-mir-1755	0	-
chr9	15933955	15934007	gga-novel-125	0	-
chr9	16236773	16236883	gga-mir-6617	0	-
chr9	16890106	16890152	gga-novel-126	0	-
chr9	20500003	20500116	gga-mir-551	0	-
chr9	22226693	22226782	gga-mir-1692	0	+
chr9	22276897	22276991	gga-mir-16-2	0	-
chr9	22277072	22277163	gga-mir-15b	0	-
chr9	23035125	23035215	gga-mir-1658	0	-
chr9	23541426	23541494	gga-mir-1754	0	-
chr9	23640740	23640837	gga-mir-1793	0	-
chr9	23720896	23721002	gga-mir-6556	0	-
chr9_NT_461630v1_random	6067	6135	gga-mir-1754_M1	0	+
chrUn_NT_464139v1	59734	59844	gga-mir-6619_M1	0	+
chrUn_NT_464156v1	985	1063	gga-mir-7478_M11	0	-
chrUn_NT_464163v1	1096	1174	gga-mir-7478_M10	0	-
chrUn_NT_464186v1	41514	41575	gga-novel-127	0	-
chrUn_NT_464201v1	17929	17998	gga-novel-128	0	+
chrUn_NT_464244v1	28463	28541	gga-mir-7478_M17	0	-
chrUn_NT_464271v1	20408	20486	gga-mir-7478_M12	0	-
chrUn_NT_464342v1	24104	24182	gga-mir-7478_M15	0	-
chrUn_NT_464347v1	17048	17126	gga-mir-7478_M1	0	+
chrUn_NT_464536v1	12869	12947	gga-mir-7478_M5	0	+
chrUn_NT_464648v1	15067	15132	gga-novel-129	0	+
chrUn_NT_464737v1	10859	10937	gga-mir-7478_M14	0	-
chrUn_NT_464976v1	4520	4598	gga-mir-7478_M18	0	-
chrUn_NT_465007v1	14891	14969	gga-mir-7478_M9	0	-
chrUn_NT_465151v1	2036	2091	gga-novel-130	0	-
chrUn_NT_465306v1	12846	12924	gga-mir-7478_M6	0	+
chrUn_NT_465310v1	5897	5975	gga-mir-7478_M16	0	-
chrUn_NT_465684v1	15292	15348	gga-mir-7480-1_M3	0	-
chrUn_NT_465684v1	15292	15348	gga-mir-7480-2_M4	0	-
chrUn_NT_465684v1	15292	15348	gga-mir-7480-3_M3	0	-
chrUn_NT_465886v1	1758	1814	gga-mir-7480-1_M2	0	+
chrUn_NT_465886v1	1758	1814	gga-mir-7480-2_M1	0	+
chrUn_NT_465886v1	1758	1814	gga-mir-7480-3_M2	0	+
chrUn_NT_465920v1	12506	12584	gga-mir-7478_M4	0	+
chrUn_NT_466163v1	5669	5776	gga-mir-3594_M2	0	-
chrUn_NT_466654v1	5134	5193	gga-novel-131	0	+
chrUn_NT_466871v1	7639	7695	gga-mir-7480-1_M4	0	-
chrUn_NT_466871v1	7639	7695	gga-mir-7480-2_M3	0	-
chrUn_NT_466871v1	7639	7695	gga-mir-7480-3_M4	0	-
chrUn_NT_467319v1	10243	10320	gga-novel-132	0	-
chrUn_NT_467624v1	4247	4357	gga-mir-6619_M2	0	-
chrUn_NT_468326v1	1841	1923	gga-mir-3534_M1	0	-
chrUn_NT_468928v1	3473	3551	gga-mir-7478_M8	0	+
chrUn_NT_469000v1	3584	3640	gga-mir-7480-1_M1	0	+
chrUn_NT_469000v1	3584	3640	gga-mir-7480-2_M2	0	+
chrUn_NT_469000v1	3584	3640	gga-mir-7480-3_M1	0	+
chrUn_NT_469421v1	4117	4176	gga-novel-133	0	+
chrUn_NT_470179v1	3890	3968	gga-mir-7478_M2	0	+
chrUn_NT_472019v1	6059	6137	gga-mir-7478_M7	0	+
chrUn_NT_472636v1	1737	1801	gga-novel-134	0	-
chrUn_NT_472997v1	208	262	gga-novel-135	0	-
chrUn_NT_473229v1	1886	1944	gga-novel-136	0	+
chrUn_NT_473491v1	5067	5157	gga-novel-137	0	+
chrUn_NT_474030v1	4874	4952	gga-mir-7478_M13	0	-
chrUn_NT_474180v1	2342	2406	gga-novel-138	0	+
chrUn_NT_476557v1	2007	2088	gga-novel-139	0	-
chrUn_NT_478695v1	1304	1372	gga-novel-140	0	+
chrUn_NT_479345v1	216	330	gga-mir-6579-2_M1	0	-
chrUn_NT_479442v1	1241	1305	gga-novel-141	0	+
chrW	2525185	2525262	gga-mir-122-2_M2	0	-
chrW	2525198	2525256	gga-novel-142	0	+
chrW	3067225	3067335	gga-mir-7b_M1	0	-
chrW_NT_463523v1_random	4384	4442	gga-novel-143	0	+
chrW_NT_463533v1_random	22	80	gga-novel-144	0	-
chrZ	193910	194001	gga-mir-1594	0	+
chrZ	761120	761197	gga-mir-122-1	0	+
chrZ	768921	768982	gga-novel-145	0	+
chrZ	8585317	8585456	gga-mir-6649	0	-
chrZ	10605983	10606093	gga-mir-6613	0	-
chrZ	16452680	16452754	gga-mir-1631	0	+
chrZ	16702090	16702149	gga-novel-146	0	-
chrZ	16702945	16703031	gga-mir-449a	0	-
chrZ	16703095	16703189	gga-mir-449b	0	-
chrZ	16704098	16704170	gga-mir-449c	0	-
chrZ	18874931	18874996	gga-mir-1584	0	+
chrZ	27510653	27510732	gga-mir-101-1	0	+
chrZ	27711423	27711531	gga-mir-6669	0	-
chrZ	32310350	32310442	gga-mir-1779	0	-
chrZ	34300479	34300536	gga-mir-7482-1	0	+
chrZ	34315560	34315617	gga-mir-7482-2	0	+
chrZ	34330946	34331003	gga-mir-7482-3	0	+
chrZ	34395459	34395516	gga-mir-7482-4	0	+
chrZ	34410493	34410550	gga-mir-7482-5	0	+
chrZ	34586152	34586211	gga-novel-147	0	+
chrZ	34645305	34645391	gga-mir-1556	0	+
chrZ	34922630	34922719	gga-mir-1416	0	+
chrZ	35181160	35181264	gga-mir-204-1	0	-
chrZ	40078116	40078225	gga-mir-7-1	0	-
chrZ	40652254	40652328	gga-mir-7439	0	-
chrZ	41649165	41649251	gga-mir-23b	0	+
chrZ	41649401	41649498	gga-mir-27b	0	+
chrZ	41649934	41650002	gga-mir-24	0	+
chrZ	44897353	44897463	gga-mir-1456	0	-
chrZ	48684569	48684679	gga-mir-6651	0	+
chrZ	55504492	55504593	gga-mir-6565	0	+
chrZ	60469241	60469328	gga-mir-9-2	0	+
chrZ	60469257	60469312	gga-novel-148	0	-
chrZ	60814497	60814575	gga-mir-7479-1	0	-
chrZ	60816938	60817016	gga-mir-7479-2	0	-
chrZ	60825835	60825913	gga-mir-7479-3	0	-
chrZ	60827466	60827544	gga-mir-7479-3_M2	0	-
chrZ	60827466	60827544	gga-mir-7479-1_M16	0	-
chrZ	60827466	60827544	gga-mir-7479-2_M8	0	-
chrZ	60831138	60831216	gga-mir-7479-3_M14	0	-
chrZ	60831138	60831216	gga-mir-7479-1_M4	0	-
chrZ	60831138	60831216	gga-mir-7479-2_M20	0	-
chrZ	60835107	60835185	gga-mir-7479-3_M7	0	-
chrZ	60835107	60835185	gga-mir-7479-1_M21	0	-
chrZ	60835107	60835185	gga-mir-7479-2_M13	0	-
chrZ	60837005	60837083	gga-mir-7479-3_M18	0	-
chrZ	60837005	60837083	gga-mir-7479-1_M8	0	-
chrZ	60837005	60837083	gga-mir-7479-2_M24	0	-
chrZ	60838134	60838212	gga-mir-7479-3_M22	0	-
chrZ	60838134	60838212	gga-mir-7479-1_M12	0	-
chrZ	60838134	60838212	gga-mir-7479-2_M4	0	-
chrZ	60843191	60843269	gga-mir-7479-3_M5	0	-
chrZ	60843191	60843269	gga-mir-7479-1_M19	0	-
chrZ	60843191	60843269	gga-mir-7479-2_M11	0	-
chrZ	60846301	60846379	gga-mir-7479-3_M16	0	-
chrZ	60846301	60846379	gga-mir-7479-1_M6	0	-
chrZ	60846301	60846379	gga-mir-7479-2_M22	0	-
chrZ	60851056	60851134	gga-mir-7479-3_M23	0	-
chrZ	60851056	60851134	gga-mir-7479-1_M13	0	-
chrZ	60851056	60851134	gga-mir-7479-2_M5	0	-
chrZ	60854297	60854375	gga-mir-7479-3_M9	0	-
chrZ	60854297	60854375	gga-mir-7479-1_M23	0	-
chrZ	60854297	60854375	gga-mir-7479-2_M15	0	-
chrZ	60856229	60856307	gga-mir-7479-3_M8	0	-
chrZ	60856229	60856307	gga-mir-7479-1_M22	0	-
chrZ	60856229	60856307	gga-mir-7479-2_M14	0	-
chrZ	60862590	60862668	gga-mir-7479-3_M6	0	-
chrZ	60862590	60862668	gga-mir-7479-1_M20	0	-
chrZ	60862590	60862668	gga-mir-7479-2_M12	0	-
chrZ	60864641	60864719	gga-mir-7479-3_M1	0	-
chrZ	60864641	60864719	gga-mir-7479-1_M15	0	-
chrZ	60864641	60864719	gga-mir-7479-2_M7	0	-
chrZ	60870954	60871032	gga-mir-7479-3_M17	0	-
chrZ	60870954	60871032	gga-mir-7479-1_M7	0	-
chrZ	60870954	60871032	gga-mir-7479-2_M23	0	-
chrZ	60877270	60877348	gga-mir-7479-3_M10	0	-
chrZ	60877270	60877348	gga-mir-7479-1_M24	0	-
chrZ	60877270	60877348	gga-mir-7479-2_M16	0	-
chrZ	60883587	60883665	gga-mir-7479-3_M15	0	-
chrZ	60883587	60883665	gga-mir-7479-1_M5	0	-
chrZ	60883587	60883665	gga-mir-7479-2_M21	0	-
chrZ	60889956	60890034	gga-mir-7479-3_M19	0	-
chrZ	60889956	60890034	gga-mir-7479-1_M9	0	-
chrZ	60889956	60890034	gga-mir-7479-2_M1	0	-
chrZ	60896273	60896351	gga-mir-7479-3_M13	0	-
chrZ	60896273	60896351	gga-mir-7479-1_M3	0	-
chrZ	60896273	60896351	gga-mir-7479-2_M19	0	-
chrZ	60902599	60902677	gga-mir-7479-3_M11	0	-
chrZ	60902599	60902677	gga-mir-7479-1_M1	0	-
chrZ	60902599	60902677	gga-mir-7479-2_M17	0	-
chrZ	60908960	60909038	gga-mir-7479-3_M3	0	-
chrZ	60908960	60909038	gga-mir-7479-1_M17	0	-
chrZ	60908960	60909038	gga-mir-7479-2_M9	0	-
chrZ	60915277	60915355	gga-mir-7479-3_M4	0	-
chrZ	60915277	60915355	gga-mir-7479-1_M18	0	-
chrZ	60915277	60915355	gga-mir-7479-2_M10	0	-
chrZ	60971598	60971676	gga-mir-7479-3_M20	0	-
chrZ	60971598	60971676	gga-mir-7479-1_M10	0	-
chrZ	60971598	60971676	gga-mir-7479-2_M2	0	-
chrZ	60979337	60979415	gga-mir-7479-3_M21	0	-
chrZ	60979337	60979415	gga-mir-7479-1_M11	0	-
chrZ	60979337	60979415	gga-mir-7479-2_M3	0	-
chrZ	60985086	60985164	gga-mir-7479-3_M12	0	-
chrZ	60985086	60985164	gga-mir-7479-1_M2	0	-
chrZ	60985086	60985164	gga-mir-7479-2_M18	0	-
chrZ	61237851	61237959	gga-mir-3607	0	-
chrZ	62791844	62791934	gga-mir-1756a	0	-
chrZ	64304207	64304259	gga-mir-7481	0	+
chrZ	64670255	64670324	gga-mir-7440	0	+
chrZ	66442095	66442173	gga-mir-1452	0	+
chrZ	66445286	66445371	gga-mir-1459	0	+
chrZ	68483505	68483580	gga-mir-7437	0	+
chrZ	70733042	70733110	gga-mir-2954	0	+
chrZ	70734340	70734438	gga-mir-1583	0	+
chrZ	70743816	70743905	gga-mir-2131	0	-
chrZ	70775548	70775613	gga-mir-7438	0	+
chrZ	78512251	78512345	gga-mir-31	0	-
chrZ	81533137	81533194	gga-mir-7483	0	-
chrZ_NT_463593v1_random	11815	11892	gga-mir-122-2_M1	0	+
chrZ_NT_463593v1_random	11821	11879	gga-novel-149	0	-
chrZ_NT_463624v1_random	10647	10704	gga-mir-7482-2_M1	0	-
chrZ_NT_463624v1_random	10647	10704	gga-mir-7482-3_M1	0	-
chrZ_NT_463624v1_random	10647	10704	gga-mir-7482-1_M1	0	-
chrZ_NT_463624v1_random	10647	10704	gga-mir-7482-5_M1	0	-
chrZ_NT_463624v1_random	10647	10704	gga-mir-7482-6_M1	0	-
chrZ_NT_463624v1_random	10647	10704	gga-mir-7482-4_M1	0	-
chrZ_NT_463637v1_random	13926	14004	gga-mir-7479-3_M24	0	-
chrZ_NT_463637v1_random	13926	14004	gga-mir-7479-1_M14	0	-
chrZ_NT_463637v1_random	13926	14004	gga-mir-7479-2_M6	0	-
