# Supplementary material for: Sex-biased microRNA expression in mammals and birds reveals underlying regulatory mechanisms and a role in dosage compensation
Source: HighWire-hosted journal article supplement (doi:10.1101/gr.225391.117), 2017-10-27
Supplement: Supplemental_Table_S2_.xlsx [file Supplemental_Table_S2_.xlsx]

## Sheet: Sheet1
Supplemental Tables S2A-C contain temporary names and assigned miRBase Ids for novel miRNAs.
Note that some putative novel miRNAs did not pass the final filtering step performed by miRBase (e.g. due to overlap with snoRNAs, rRNAs, etc; hairpin not meeting structure criteria; low complexity) and therefore do not have assigned IDs.
All analyses were performed with the full set of putative novel miRNA precursors (see Supplemental Table S1).

## Sheet: TableS2A_Mouse_novel_miRBase
Temporary ID	miRBase ID
mmu-novel-1	mmu-mir-5104b
mmu-novel-2	mmu-mir-12178
mmu-novel-3	mmu-mir-12179
mmu-novel-4	mmu-mir-12180
mmu-novel-7	mmu-mir-12181
mmu-novel-8	mmu-mir-12182
mmu-novel-10	mmu-mir-12183
mmu-novel-13	mmu-mir-203b
mmu-novel-15	mmu-mir-12184
mmu-novel-16	mmu-mir-9b-2
mmu-novel-17	mmu-mir-12185
mmu-novel-18	mmu-mir-12186
mmu-novel-20	mmu-mir-12187
mmu-novel-21	mmu-mir-1970b
mmu-novel-22	mmu-mir-12188
mmu-novel-23	mmu-mir-3083b
mmu-novel-24	mmu-mir-12189
mmu-novel-25	mmu-mir-12190
mmu-novel-26	mmu-mir-12191
mmu-novel-27	mmu-mir-122b
mmu-novel-28	mmu-mir-12192
mmu-novel-29	mmu-mir-12193
mmu-novel-33	mmu-mir-124b
mmu-novel-34	mmu-mir-12194
mmu-novel-35	mmu-mir-12195
mmu-novel-36	mmu-mir-9b-1
mmu-novel-38	mmu-mir-3473h
mmu-novel-44	mmu-mir-12196
mmu-novel-45	mmu-mir-12197
mmu-novel-46	mmu-mir-12198
mmu-novel-47	mmu-mir-12199
mmu-novel-48	mmu-mir-12200
mmu-novel-50	mmu-mir-12201
mmu-novel-51	mmu-mir-12202
mmu-novel-54	mmu-mir-9b-3
mmu-novel-55	mmu-mir-12203
mmu-novel-58	mmu-mir-12204
mmu-novel-60	mmu-mir-1970c
mmu-novel-61	mmu-mir-12205
mmu-novel-62	mmu-mir-12206

## Sheet: TableS2B_Opossum_novel_miRBase
Temporary ID	miRBase ID
mdo-novel-1	mdo-mir-12296
mdo-novel-116	mdo-mir-12297a
mdo-novel-170	mdo-mir-12297b
mdo-novel-100	mdo-mir-12297c-1
mdo-novel-80	mdo-mir-12297c-2
mdo-novel-101	mdo-mir-12297c-3
mdo-novel-8	mdo-mir-12297d
mdo-novel-139	mdo-mir-12297e-1
mdo-novel-174	mdo-mir-12297e-2
mdo-novel-85	mdo-mir-12297e-3
mdo-novel-163	mdo-mir-12297f
mdo-novel-7	mdo-mir-12297g-1
mdo-novel-9	mdo-mir-12297g-2
mdo-novel-6	mdo-mir-12297g-3
mdo-novel-121	mdo-mir-12297h
mdo-novel-143	mdo-mir-12297i
mdo-novel-10	mdo-mir-12297j
mdo-novel-3	mdo-mir-12298
mdo-novel-4	mdo-mir-9b-3
mdo-novel-5	mdo-mir-12299-1
mdo-novel-157	mdo-mir-12299-2
mdo-novel-11	mdo-mir-12300
mdo-novel-12	mdo-mir-325
mdo-novel-13	mdo-mir-12301
mdo-novel-14	mdo-mir-12302
mdo-novel-15	mdo-mir-12303
mdo-novel-16	mdo-mir-12304-1
mdo-novel-17	mdo-mir-12304-2
mdo-novel-18	mdo-mir-12305
mdo-novel-19	mdo-mir-7356b
mdo-novel-20	mdo-mir-12306
mdo-novel-23	mdo-mir-12307
mdo-novel-24	mdo-mir-12308a
mdo-novel-102	mdo-mir-12308b
mdo-novel-25	mdo-mir-1388
mdo-novel-26	mdo-mir-352
mdo-novel-27	mdo-mir-12309
mdo-novel-28	mdo-mir-12310
mdo-novel-29	mdo-mir-12311
mdo-novel-30	mdo-mir-12312
mdo-novel-31	mdo-mir-1329
mdo-novel-35	mdo-mir-12313
mdo-novel-36	mdo-mir-7286b
mdo-novel-37	mdo-mir-12314
mdo-novel-38	mdo-mir-12315
mdo-novel-39	mdo-mir-12316
mdo-novel-41	mdo-mir-12317
mdo-novel-43	mdo-mir-7284b
mdo-novel-45	mdo-mir-12318
mdo-novel-46	mdo-mir-12319
mdo-novel-47	mdo-mir-12320
mdo-novel-48	mdo-mir-205b
mdo-novel-49	mdo-mir-12321
mdo-novel-50	mdo-mir-9b-1
mdo-novel-51	mdo-mir-12322
mdo-novel-52	mdo-mir-12323
mdo-novel-55	mdo-mir-12324a
mdo-novel-72	mdo-mir-12324b
mdo-novel-57	mdo-mir-12325
mdo-novel-58	mdo-mir-12326
mdo-novel-59	mdo-mir-12327-1
mdo-novel-60	mdo-mir-12327-2
mdo-novel-61	mdo-mir-12328
mdo-novel-63	mdo-mir-133b
mdo-novel-65	mdo-mir-7262c
mdo-novel-68	mdo-mir-7262d
mdo-novel-79	mdo-mir-7262e
mdo-novel-213	mdo-mir-7262f
mdo-novel-104	mdo-mir-7262g
mdo-novel-178	mdo-mir-7262h
mdo-novel-238	mdo-mir-7262i
mdo-novel-131	mdo-mir-7262j
mdo-novel-84	mdo-mir-7262k
mdo-novel-135	mdo-mir-7262l
mdo-novel-140	mdo-mir-7262m
mdo-novel-66	mdo-mir-12329
mdo-novel-67	mdo-mir-12330
mdo-novel-69	mdo-mir-12331
mdo-novel-71	mdo-mir-12332
mdo-novel-73	mdo-mir-3600
mdo-novel-74	mdo-mir-12333
mdo-novel-75	mdo-mir-12334
mdo-novel-76	mdo-mir-12335-1
mdo-novel-77	mdo-mir-12335-2
mdo-novel-78	mdo-mir-12336
mdo-novel-81	mdo-mir-12337
mdo-novel-82	mdo-mir-12338
mdo-novel-83	mdo-mir-9b-2
mdo-novel-86	mdo-mir-122b
mdo-novel-87	mdo-mir-12339
mdo-novel-88	mdo-mir-30e
mdo-novel-89	mdo-mir-12340
mdo-novel-90	mdo-mir-12341
mdo-novel-91	mdo-mir-12342
mdo-novel-92	mdo-mir-12343
mdo-novel-93	mdo-mir-12344
mdo-novel-94	mdo-mir-12345
mdo-novel-96	mdo-mir-1306
mdo-novel-97	mdo-mir-12346
mdo-novel-98	mdo-mir-1546b
mdo-novel-99	mdo-mir-7312b
mdo-novel-103	mdo-mir-12347
mdo-novel-105	mdo-mir-12348
mdo-novel-106	mdo-mir-12349
mdo-novel-107	mdo-mir-12350
mdo-novel-108	mdo-mir-12351
mdo-novel-109	mdo-mir-34d
mdo-novel-110	mdo-mir-2985-1
mdo-novel-111	mdo-mir-12352
mdo-novel-113	mdo-mir-12353
mdo-novel-114	mdo-mir-12354
mdo-novel-118	mdo-mir-12355
mdo-novel-119	mdo-mir-12356
mdo-novel-120	mdo-mir-12357
mdo-novel-122	mdo-mir-12358
mdo-novel-124	mdo-mir-12359
mdo-novel-125	mdo-mir-12360
mdo-novel-126	mdo-mir-12361
mdo-novel-127	mdo-mir-7323b
mdo-novel-128	mdo-mir-12362
mdo-novel-129	mdo-mir-12363
mdo-novel-130	mdo-mir-2985-2
mdo-novel-132	mdo-mir-12364
mdo-novel-134	mdo-mir-12365
mdo-novel-136	mdo-mir-12366a
mdo-novel-250	mdo-mir-12366b
mdo-novel-137	mdo-mir-12367
mdo-novel-142	mdo-mir-12368
mdo-novel-144	mdo-mir-7320b
mdo-novel-145	mdo-mir-12369
mdo-novel-146	mdo-mir-12370
mdo-novel-147	mdo-mir-12371
mdo-novel-148	mdo-mir-12372
mdo-novel-150	mdo-mir-12373
mdo-novel-151	mdo-mir-12374
mdo-novel-152	mdo-mir-12375
mdo-novel-153	mdo-mir-12376
mdo-novel-154	mdo-mir-12377
mdo-novel-155	mdo-mir-12378
mdo-novel-156	mdo-mir-12379
mdo-novel-158	mdo-mir-12380
mdo-novel-159	mdo-mir-12381
mdo-novel-160	mdo-mir-12382
mdo-novel-161	mdo-mir-12383
mdo-novel-162	mdo-mir-12384
mdo-novel-164	mdo-mir-12385
mdo-novel-165	mdo-mir-12386
mdo-novel-166	mdo-mir-12387
mdo-novel-167	mdo-mir-551c
mdo-novel-168	mdo-mir-12388
mdo-novel-169	mdo-mir-12389
mdo-novel-171	mdo-mir-12390
mdo-novel-176	mdo-mir-12391
mdo-novel-177	mdo-mir-12392
mdo-novel-179	mdo-mir-12393
mdo-novel-180	mdo-mir-12394
mdo-novel-181	mdo-mir-12395
mdo-novel-182	mdo-mir-12396
mdo-novel-183	mdo-mir-12397
mdo-novel-184	mdo-mir-12398
mdo-novel-185	mdo-mir-210b
mdo-novel-187	mdo-mir-1549b
mdo-novel-189	mdo-mir-7345b
mdo-novel-190	mdo-mir-12399
mdo-novel-192	mdo-mir-12400
mdo-novel-195	mdo-mir-7385g-1
mdo-novel-196	mdo-mir-7385g-2
mdo-novel-199	mdo-mir-7385g-3
mdo-novel-197	mdo-mir-7385h
mdo-novel-198	mdo-mir-7385i-1
mdo-novel-194	mdo-mir-7385i-2
mdo-novel-200	mdo-mir-12401
mdo-novel-201	mdo-mir-1544f
mdo-novel-202	mdo-mir-1545d-1
mdo-novel-212	mdo-mir-1545d-2
mdo-novel-207	mdo-mir-1545d-3
mdo-novel-208	mdo-mir-1545d-4
mdo-novel-204	mdo-mir-1545e-1
mdo-novel-205	mdo-mir-1545e-2
mdo-novel-203	mdo-mir-1545e-3
mdo-novel-209	mdo-mir-1545e-4
mdo-novel-210	mdo-mir-1545e-5
mdo-novel-206	mdo-mir-1545f
mdo-novel-211	mdo-mir-1544g
mdo-novel-214	mdo-mir-12402-1
mdo-novel-215	mdo-mir-12402-2
mdo-novel-216	mdo-mir-16b
mdo-novel-217	mdo-mir-7386p
mdo-novel-222	mdo-mir-7371k
mdo-novel-224	mdo-mir-7371l
mdo-novel-221	mdo-mir-7371m
mdo-novel-219	mdo-mir-7371n
mdo-novel-218	mdo-mir-7371o
mdo-novel-225	mdo-mir-7371p
mdo-novel-220	mdo-mir-7371q
mdo-novel-223	mdo-mir-7386q
mdo-novel-226	mdo-mir-7373e
mdo-novel-227	mdo-mir-12403
mdo-novel-230	mdo-mir-7375c-1
mdo-novel-235	mdo-mir-7375c-2
mdo-novel-229	mdo-mir-7375c-3
mdo-novel-228	mdo-mir-7375c-4
mdo-novel-233	mdo-mir-7375d
mdo-novel-232	mdo-mir-7375e
mdo-novel-236	mdo-mir-7374d
mdo-novel-237	mdo-mir-7373f
mdo-novel-239	mdo-mir-7394c
mdo-novel-240	mdo-mir-7398v
mdo-novel-241	mdo-mir-7398w
mdo-novel-242	mdo-mir-7398x
mdo-novel-243	mdo-mir-7398y
mdo-novel-244	mdo-mir-12404
mdo-novel-245	mdo-mir-12405
mdo-novel-246	mdo-mir-12406
mdo-novel-247	mdo-mir-12407
mdo-novel-248	mdo-mir-12408
mdo-novel-249	mdo-mir-12409
mdo-novel-251	mdo-mir-12410
mdo-novel-252	mdo-mir-12411
mdo-novel-253	mdo-mir-12412

## Sheet: TableS2C_Chicken_novel_miRBase
Temporary ID	miRBase ID
gga-novel-1	gga-mir-12207
gga-novel-2	gga-mir-182
gga-novel-3	gga-mir-96
gga-novel-4	gga-mir-12208
gga-novel-5	gga-mir-12209
gga-novel-6	gga-mir-12210
gga-novel-7	gga-mir-12211
gga-novel-8	gga-mir-12212
gga-novel-9	gga-mir-12213
gga-novel-10	gga-mir-2984
gga-novel-11	gga-mir-12214
gga-novel-12	gga-mir-2985-1
gga-novel-13	gga-mir-12215
gga-novel-14	gga-mir-12216
gga-novel-15	gga-mir-9b-1
gga-novel-16	gga-mir-12217
gga-novel-17	gga-mir-184b
gga-novel-18	gga-mir-12218
gga-novel-20	gga-mir-12219
gga-novel-21	gga-mir-12220
gga-novel-22	gga-mir-12221-1
gga-novel-23	gga-mir-12221-2
gga-novel-24	gga-mir-191
gga-novel-25	gga-mir-425
gga-novel-26	gga-mir-12222
gga-novel-27	gga-mir-145
gga-novel-28	gga-mir-143
gga-novel-29	gga-mir-12223
gga-novel-30	gga-mir-12224
gga-novel-31	gga-mir-12225
gga-novel-32	gga-mir-12226
gga-novel-33	gga-mir-12227
gga-novel-34	gga-mir-12228
gga-novel-35	gga-mir-12229
gga-novel-36	gga-mir-12230
gga-novel-37	gga-mir-12231
gga-novel-39	gga-mir-12232
gga-novel-41	gga-mir-338
gga-novel-42	gga-mir-12233
gga-novel-43	gga-mir-12234
gga-novel-44	gga-mir-2184b
gga-novel-45	gga-mir-2184a
gga-novel-46	gga-mir-132a
gga-novel-47	gga-mir-132b
gga-novel-48	gga-mir-212
gga-novel-49	gga-mir-132c
gga-novel-50	gga-mir-12235
gga-novel-51	gga-mir-12236
gga-novel-52	gga-mir-12237
gga-novel-53	gga-mir-10585
gga-novel-54	gga-mir-12238
gga-novel-55	gga-mir-12239
gga-novel-56	gga-mir-12240
gga-novel-57	gga-mir-12241
gga-novel-58	gga-mir-12242
gga-novel-59	gga-mir-1388b
gga-novel-60	gga-mir-1388a
gga-novel-61	gga-mir-12243
gga-novel-62	gga-mir-12244
gga-novel-63	gga-mir-12245
gga-novel-64	gga-mir-12246
gga-novel-65	gga-mir-12247-1
gga-novel-66	gga-mir-12247-2
gga-novel-68	gga-mir-12248
gga-novel-69	gga-mir-12249
gga-novel-70	gga-mir-12250
gga-novel-72	gga-mir-12251
gga-novel-73	gga-mir-190b
gga-novel-75	gga-mir-12252
gga-novel-76	gga-mir-205c
gga-novel-77	gga-mir-12253
gga-novel-78	gga-mir-12254
gga-novel-79	gga-mir-12255
gga-novel-80	gga-mir-12256
gga-novel-81	gga-mir-12257
gga-novel-83	gga-mir-12258
gga-novel-86	gga-mir-12259
gga-novel-87	gga-mir-1784b
gga-novel-88	gga-mir-12260
gga-novel-89	gga-mir-12261
gga-novel-91	gga-mir-12262
gga-novel-92	gga-mir-12263
gga-novel-93	gga-mir-12264
gga-novel-94	gga-mir-12265
gga-novel-95	gga-mir-12266-1
gga-novel-143	gga-mir-12266-2
gga-novel-144	gga-mir-12266-3
gga-novel-96	gga-mir-10c
gga-novel-97	gga-mir-148b
gga-novel-98	gga-mir-12267
gga-novel-99	gga-mir-12268
gga-novel-101	gga-mir-363
gga-novel-102	gga-mir-12269
gga-novel-105	gga-mir-12270
gga-novel-106	gga-mir-12271
gga-novel-107	gga-mir-2985-2
gga-novel-108	gga-mir-12272
gga-novel-109	gga-mir-12273
gga-novel-110	gga-mir-12274
gga-novel-111	gga-mir-12275
gga-novel-112	gga-mir-12276
gga-novel-113	gga-mir-12277
gga-novel-114	gga-mir-12278
gga-novel-115	gga-mir-12279
gga-novel-116	gga-mir-210b
gga-novel-117	gga-mir-210a
gga-novel-118	gga-mir-129-1
gga-novel-119	gga-mir-1763b
gga-novel-120	gga-mir-12280
gga-novel-121	gga-mir-214b
gga-novel-122	gga-mir-12281
gga-novel-123	gga-mir-12282
gga-novel-124	gga-mir-12283
gga-novel-125	gga-mir-12284
gga-novel-127	gga-mir-12285
gga-novel-128	gga-mir-12286
gga-novel-129	gga-mir-12287
gga-novel-130	gga-mir-12288
gga-novel-131	gga-mir-12289-1
gga-novel-133	gga-mir-12289-2
gga-novel-132	gga-let-7l-1
gga-novel-134	gga-mir-129-2
gga-novel-135	gga-mir-12290
gga-novel-136	gga-mir-726
gga-novel-137	gga-mir-12291
gga-novel-138	gga-mir-129-3
gga-novel-139	gga-let-7l-2
gga-novel-140	gga-mir-12292
gga-novel-141	gga-mir-12293
gga-novel-142	gga-mir-122b-1
gga-novel-145	gga-mir-12294
gga-novel-146	gga-mir-449d
gga-novel-147	gga-mir-12295
gga-novel-148	gga-mir-9b-2
gga-novel-149	gga-mir-122b-2
